# Supplementary material for: An organoselenium-catalyzed N1- and N2-selective aza-Wacker reaction of alkenes with benzotriazoles
Source: Royal Society of Chemistry journal article supplement (doi:10.1039/d0cc01079k), 2020-01-01

## Electronic Supplementary Information

### Organoselenium-Catalyzed N<sup>1</sup>- and N<sup>2</sup>-selective aza-Wacker reaction of alkenes with benzotriazoles

#### Table of Contents

|                                                                                                  |     |
|--------------------------------------------------------------------------------------------------|-----|
| I. General Remarks.....                                                                          | S2  |
| II. GC-MS study.....                                                                             | S2  |
| II. Synthesis Procedure.....                                                                     | S2  |
| III. Analytical Data of Compounds <b>3</b> and <b>4</b> .....                                    | S3  |
| IV. <sup>1</sup> H NMR, and <sup>13</sup> C NMR Spectra of Compounds <b>3</b> and <b>4</b> ..... | S27 |

## I. General remarks.

All reagents were purchased from commercial sources and used without further purification.  $^1\text{H}$  NMR and  $^{13}\text{C}$  NMR spectra were recorded on a Bruker Ascend™ 400 spectrometer in deuterated solvents containing TMS as an internal reference standard. High-resolution mass spectrometry (HRMS) analyses were conducted on a Waters LCT Premier/XE. Melting points were measured on a melting point apparatus equipped with a thermometer and were uncorrected. All the reactions were conducted in oil bath and monitored by thin-layer chromatography (TLC) using GF254 silica gel-coated TLC plates. Purification by flash column chromatography was performed over  $\text{SiO}_2$  (silica gel 200–300 mesh).

## II. GC-MS study

To a reaction tube equipped with a stir bar, styrene **1a** (0.5 mmol, 52.0 mg), benzotriazole **2a** (0.5 mmol, 59.6 mg),  $(\text{PhSe})_2$  (5% mol, 7.8 mg) and selectfluor (0.6 mmol, 212.4 mg) were added. The reaction mixture was stirred in DME (2.0 mL) at 120 °C for 1.5 h. And then take 2  $\mu\text{L}$  reaction liquid for GC-MS analysis. After scanned for 8.202 min, the signal 260.1, which is more like a mass fragment from intermediate **6**.

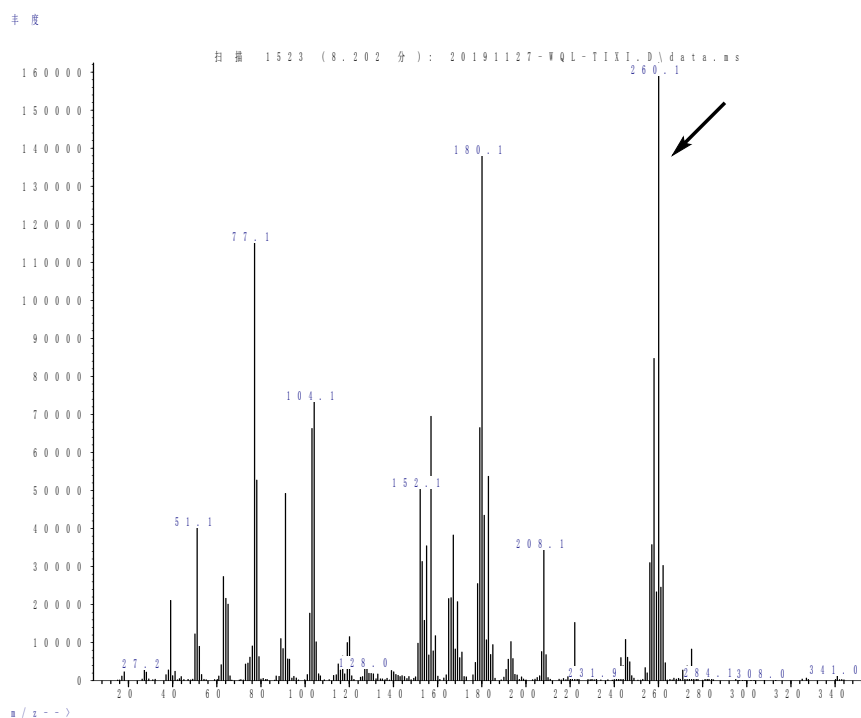

### III. General procedure:

#### General procedure for compounds 3:

To a reaction tube equipped with a stir bar, alkenes **1** (0.5 mmol), benzotriazoles **2** (0.5 mmol), (PhSe)<sub>2</sub> (5% mol), and selectfluor (0.6 mmol) were added sequentially. Then the reaction mixture was stirred in DME (2.0 mL) at 120 °C. Upon completion of the reaction (as monitored by TLC), the mixture was cooled to room temperature and quenched with water before being extracted with dichloromethane (5 × 3 mL). The combined organic layers were dried over anhydrous Na<sub>2</sub>SO<sub>4</sub> and concentrated under reduced pressure to give a residue, which was purified by flash column chromatography to give the desired product **3**.

#### General procedure for compounds 4:

To a reaction tube equipped with a stir bar, alkenes **1** (0.5 mmol), benzotriazoles **2** (0.5 mmol), (PhSe)<sub>2</sub> (5% mol), Me<sub>3</sub>SiH (0.5 mmol, 37.1 mg) and K<sub>2</sub>S<sub>2</sub>O<sub>8</sub> (0.6 mmol) were added sequentially. Then the reaction mixture was stirred in dioxane (2.0 mL) at 120 °C. Upon completion of the reaction (as monitored by TLC), the mixture was cooled to room temperature and quenched with water before being extracted with dichloromethane (5 × 3 mL). The combined organic layers were dried over anhydrous Na<sub>2</sub>SO<sub>4</sub> and concentrated under reduced pressure to give a residue, which was purified by flash column chromatography to give the desired product **4**.

**General procedure for compounds 5, 6, 7 and 8, please see references 1-4.**

### IV. Analytical data of products obtained in this study

#### 1-(1-phenylvinyl)-1*H*-benzo[*d*][1,2,3]triazole (**3a**).

styrene **1a** (0.5 mmol, 52.0 mg), benzotriazole **2a** (0.5 mmol, 59.6 mg), (PhSe)<sub>2</sub> (5% mol, 7.8 mg) and selectfluor (0.6 mmol, 212.4 mg). Then the reaction mixture was stirred in DME (2.0 mL) at 120 °C. Upon completion of the reaction (as monitored by TLC), the mixture was cooled to room temperature and quenched with water before being extracted with dichloromethane (5 × 3 mL). The combined organic layers were

dried over anhydrous Na<sub>2</sub>SO<sub>4</sub> and concentrated under reduced pressure to give a residue, which was purified by flash column chromatography to give the desired product **3a** as pale yellow liquid (79%, 87.4 mg).

<sup>1</sup>H NMR (400 MHz; CDCl<sub>3</sub>): δ = 5.79 (d, *J* = 0.8, 1H), 5.81 (s, 1H), 7.07 (d, *J* = 6.0, 1H), 7.30 (d, *J* = 7.2, 2H), 7.37-7.44 (m, 5H), 8.12 (t, *J* = 2.0, 1H). <sup>13</sup>C NMR (100 MHz; CDCl<sub>3</sub>): δ = 111.1, 111.2, 120.1, 124.2, 126.9, 127.8, 128.8, 129.8, 132.9, 134.6, 142.6, 146.1. HRMS (ESI-TOF) Calcd for C<sub>14</sub>H<sub>12</sub>N<sub>3</sub>, [M+H]<sup>+</sup> 222.1031; Found 222.1038.

#### **1-(1-(2-fluorophenyl)vinyl)-1*H*-benzo[*d*][1,2,3]triazole (3b).**

1-fluoro-2-vinylbenzene **1b** (0.5 mmol, 61.0 mg), benzotriazole **2a** (0.5 mmol, 59.6 mg), (PhSe)<sub>2</sub> (5% mol, 7.8 mg) and selectfluor (0.6 mmol, 212.4 mg). Then the reaction mixture was stirred in DME (2.0 mL) at 120 °C. Upon completion of the reaction (as monitored by TLC), the mixture was cooled to room temperature and quenched with water before being extracted with dichloromethane (5 × 3 mL). The combined organic layers were dried over anhydrous Na<sub>2</sub>SO<sub>4</sub> and concentrated under reduced pressure to give a residue, which was purified by flash column chromatography to give the desired product **3b** as pale yellow liquid (73%, 87.3 mg).

<sup>1</sup>H NMR (400 MHz; CDCl<sub>3</sub>): δ = 5.82 (s, 1H), 6.01 (s, 1H), 7.12-7.20 (m, 3H), 7.25 (d, *J* = 7.2, 1H), 7.37-7.43 (m, 3H), 8.10 (s, 1H). <sup>13</sup>C NMR (100 MHz; CDCl<sub>3</sub>): δ = 110.6, 113.6 (d, *J* = 4.3 Hz), 116.5 (d, *J* = 21.6 Hz), 120.2, 124.2, 124.5, 127.9, 130.1 (d, *J* = 2.2 Hz), 131.4, 132.5, 137.4, 146.1, 158.9, 161.4 (d, *J* = 252.3 Hz). HRMS (ESI-TOF) Calcd for C<sub>14</sub>H<sub>11</sub>FN<sub>3</sub>, [M+H]<sup>+</sup> 240.0937; Found 240.0940.

#### **1-(1-(4-fluorophenyl)vinyl)-1*H*-benzo[*d*][1,2,3]triazole (3c).**

1-fluoro-4-vinylbenzene **1c** (0.5 mmol, 61.0 mg), benzotriazole **2a** (0.5 mmol, 59.6 mg), (PhSe)<sub>2</sub> (5% mol, 7.8 mg) and selectfluor (0.6 mmol, 212.4 mg). Then the reaction mixture was stirred in DME (2.0 mL) at 120 °C. Upon completion of the reaction (as monitored by TLC), the mixture was cooled to room temperature and

quenched with water before being extracted with dichloromethane (5 × 3 mL). The combined organic layers were dried over anhydrous Na<sub>2</sub>SO<sub>4</sub> and concentrated under reduced pressure to give a residue, which was purified by flash column chromatography to give the desired product **3c** as pale yellow liquid (75%, 89.7 mg).

<sup>1</sup>H NMR (400 MHz; CDCl<sub>3</sub>): δ = 5.76 (s, 2H), 7.07-7.13 (m, 3H), 7.30 (q, *J* = 5.2, 2H), 7.39-7.42 (m, 2H), 8.12 (d, *J* = 6.8, 1H). <sup>13</sup>C NMR (100 MHz; CDCl<sub>3</sub>): δ = 110.8, 111.0, 115.8, 116.0, 120.4, 124.3, 127.9, 128.9 (d, *J* = 8.3 Hz), 130.8 (d, *J* = 3.3 Hz), 132.8, 141.7, 146.1, 162.3 (d, *J* = 250.3 Hz), 164.8. HRMS (ESI-TOF) Calcd for C<sub>14</sub>H<sub>11</sub>FN<sub>3</sub>, [M+H]<sup>+</sup> 240.0937; Found 240.0933.

#### **1-(1-(2-chlorophenyl)vinyl)-1*H*-benzo[*d*][1,2,3]triazole (3d).**

1-chloro-2-vinylbenzene **1d** (0.5 mmol, 69.3 mg), benzotriazole **2a** (0.5 mmol, 59.6 mg), (PhSe)<sub>2</sub> (5% mol, 7.8 mg) and selectfluor (0.6 mmol, 212.4 mg). Then the reaction mixture was stirred in DME (2.0 mL) at 120 °C. Upon completion of the reaction (as monitored by TLC), the mixture was cooled to room temperature and quenched with water before being extracted with dichloromethane (5 × 3 mL). The combined organic layers were dried over anhydrous Na<sub>2</sub>SO<sub>4</sub> and concentrated under reduced pressure to give a residue, which was purified by flash column chromatography to give the desired product **3d** as white solid (76%, 97.1 mg), melting point: 68-69 °C.

<sup>1</sup>H NMR (400 MHz; CDCl<sub>3</sub>): δ = 5.59 (s, 1H), 6.08 (s, 1H), 7.08 (d, *J* = 6.8, 1H), 7.37-7.41 (m, 5H), 7.55 (dd, *J*<sub>1</sub> = 1.2, *J*<sub>2</sub> = 6.0, 1H), 8.09 (d, *J* = 2.0, 1H). <sup>13</sup>C NMR (100 MHz; CDCl<sub>3</sub>): δ = 110.7, 111.7, 120.2, 124.2, 127.2, 128.0, 130.3, 130.9, 131.6, 132.2, 133.4, 134.1, 140.7, 146.2. HRMS (ESI-TOF) Calcd for C<sub>14</sub>H<sub>11</sub>ClN<sub>3</sub>, [M+H]<sup>+</sup> 256.0642; Found 256.0638.

#### **1-(1-(3-chlorophenyl)vinyl)-1*H*-benzo[*d*][1,2,3]triazole (3e).**

1-chloro-3-vinylbenzene **1e** (0.5 mmol, 69.3 mg), benzotriazole **2a** (0.5 mmol, 59.6 mg), (PhSe)<sub>2</sub> (5% mol, 7.8 mg) and selectfluor (0.6 mmol, 212.4 mg). Then the reaction mixture was stirred in DME (2.0 mL) at 120 °C. Upon completion of the

reaction (as monitored by TLC), the mixture was cooled to room temperature and quenched with water before being extracted with dichloromethane (5 × 3 mL). The combined organic layers were dried over anhydrous Na<sub>2</sub>SO<sub>4</sub> and concentrated under reduced pressure to give a residue, which was purified by flash column chromatography to give the desired product **3e** as pale yellow liquid (74%, 94.6 mg).

<sup>1</sup>H NMR (400 MHz; CDCl<sub>3</sub>): δ = 5.81 (s, 1H), 5.84 (s, 1H), 7.15 (d, *J* = 8.0, 2H), 7.32-7.43 (m, 5H), 8.13 (t, *J* = 1.2, 1H). <sup>13</sup>C NMR (100 MHz; CDCl<sub>3</sub>): δ = 110.9, 112.1, 120.2, 124.3, 125.1, 127.0, 128.1, 129.8, 130.1, 132.8, 134.9, 136.5, 141.4, 146.1. HRMS (ESI-TOF) Calcd for C<sub>14</sub>H<sub>11</sub>ClN<sub>3</sub>, [M+H]<sup>+</sup> 256.0642; Found 256.0647.

#### **1-(1-(4-chlorophenyl)vinyl)-1*H*-benzo[*d*][1,2,3]triazole (3f).**

1-chloro-4-vinylbenzene **1f** (0.5 mmol, 69.3 mg), benzotriazole **2a** (0.5 mmol, 59.6 mg), (PhSe)<sub>2</sub> (5% mol, 7.8 mg) and selectfluor (0.6 mmol, 212.4 mg). Then the reaction mixture was stirred in DME (2.0 mL) at 120 °C. Upon completion of the reaction (as monitored by TLC), the mixture was cooled to room temperature and quenched with water before being extracted with dichloromethane (5 × 3 mL). The combined organic layers were dried over anhydrous Na<sub>2</sub>SO<sub>4</sub> and concentrated under reduced pressure to give a residue, which was purified by flash column chromatography to give the desired product **3f** as white solid (78%, 99.7 mg), melting point: 57-58 °C.

<sup>1</sup>H NMR (400 MHz; CDCl<sub>3</sub>): δ = 5.80 (s, 1H), 5.81 (s, 1H), 7.13 (d, *J* = 6.8, 1H), 7.24 (d, *J* = 8.4, 2H), 7.33-7.42 (m, 4H), 8.13 (d, *J* = 2.0, 1H). <sup>13</sup>C NMR (100 MHz; CDCl<sub>3</sub>): δ = 111.0, 111.4, 120.2, 124.3, 128.0, 128.2, 129.1, 132.7, 133.1, 135.8, 141.6, 146.1. HRMS (ESI-TOF) Calcd for C<sub>14</sub>H<sub>11</sub>ClN<sub>3</sub>, [M+H]<sup>+</sup> 256.0642; Found 256.0639.

#### **1-(1-(2-bromophenyl)vinyl)-1*H*-benzo[*d*][1,2,3]triazole (3g).**

1-bromo-2-vinylbenzene **1g** (0.5 mmol, 91.5 mg), benzotriazole **2a** (0.5 mmol, 59.6 mg), (PhSe)<sub>2</sub> (5% mol, 7.8 mg) and selectfluor (0.6 mmol, 212.4 mg). Then the reaction mixture was stirred in DME (2.0 mL) at 120 °C. Upon completion of the

reaction (as monitored by TLC), the mixture was cooled to room temperature and quenched with water before being extracted with dichloromethane (5 × 3 mL). The combined organic layers were dried over anhydrous Na<sub>2</sub>SO<sub>4</sub> and concentrated under reduced pressure to give a residue, which was purified by flash column chromatography to give the desired product **3g** as white solid (75%, 112.6 mg), melting point: 67-68 °C.

<sup>1</sup>H NMR (400 MHz; CDCl<sub>3</sub>): δ = 5.55 (d, *J* = 0.8, 1H), 6.08 (d, *J* = 0.8, 1H), 7.05 (d, *J* = 6.8, 1H), 7.34-7.38 (m, 3H), 7.46 (q, *J* = 6.4, 1H), 7.57-7.62 (m, 2H), 8.09 (dd, *J*<sub>1</sub> = 2.8, *J*<sub>2</sub> = 6.8, 1H). <sup>13</sup>C NMR (100 MHz; CDCl<sub>3</sub>): δ = 110.8, 111.2, 120.2, 122.9, 124.2, 127.8, 128.0, 131.1, 131.9, 132.2, 133.5, 136.0, 142.0, 146.3. HRMS (ESI-TOF) Calcd for C<sub>14</sub>H<sub>11</sub>BrN<sub>3</sub>, [M+H]<sup>+</sup> 300.0137; Found 300.0142.

#### **1-(1-(3-bromophenyl)vinyl)-1H-benzo[*d*][1,2,3]triazole (3h).**

1-bromo-3-vinylbenzene **1h** (0.5 mmol, 91.5 mg), benzotriazole **2a** (0.5 mmol, 59.6 mg), (PhSe)<sub>2</sub> (5% mol, 7.8 mg) and selectfluor (0.6 mmol, 212.4 mg). Then the reaction mixture was stirred in DME (2.0 mL) at 120 °C. Upon completion of the reaction (as monitored by TLC), the mixture was cooled to room temperature and quenched with water before being extracted with dichloromethane (5 × 3 mL). The combined organic layers were dried over anhydrous Na<sub>2</sub>SO<sub>4</sub> and concentrated under reduced pressure to give a residue, which was purified by flash column chromatography to give the desired product **3h** as pale yellow liquid (72%, 108.1 mg). <sup>1</sup>H NMR (400 MHz; CDCl<sub>3</sub>): δ = 5.82 (s, 1H), 5.84 (s, 1H), 7.14 (d, *J* = 8.0, 2H), 7.19 (d, *J* = 8.4, 1H), 7.24-7.28 (m, 2H), 7.39-7.46 (m, 2H), 7.56 (d, *J* = 8.0, 1H). <sup>13</sup>C NMR (100 MHz; CDCl<sub>3</sub>): δ = 110.9, 112.1, 120.3, 124.4, 125.5, 128.1, 129.9, 130.3, 132.8, 136.7, 141.3, 146.1. HRMS (ESI-TOF) Calcd for C<sub>14</sub>H<sub>11</sub>BrN<sub>3</sub>, [M+H]<sup>+</sup> 300.0137; Found 300.0148.

#### **1-(1-(4-bromophenyl)vinyl)-1H-benzo[*d*][1,2,3]triazole (3i).**

1-bromo-4-vinylbenzene **1i** (0.5 mmol, 91.5 mg), benzotriazole **2a** (0.5 mmol, 59.6 mg), (PhSe)<sub>2</sub> (5% mol, 7.8 mg) and selectfluor (0.6 mmol, 212.4 mg). Then the

reaction mixture was stirred in DME (2.0 mL) at 120 °C. Upon completion of the reaction (as monitored by TLC), the mixture was cooled to room temperature and quenched with water before being extracted with dichloromethane (5 × 3 mL). The combined organic layers were dried over anhydrous Na<sub>2</sub>SO<sub>4</sub> and concentrated under reduced pressure to give a residue, which was purified by flash column chromatography to give the desired product **3i** as white solid (80%, 120.1 mg), melting point: 57-58 °C.

<sup>1</sup>H NMR (400 MHz; CDCl<sub>3</sub>): δ = 5.80 (d, *J* = 1.2, 1H), 5.82 (d, *J* = 0.8, 1H), 7.11-7.13 (m, 1H), 7.17 (dd, *J*<sub>1</sub> = 1.6, *J*<sub>2</sub> = 6.8, 2H), 7.40 (dd, *J*<sub>1</sub> = 1.6, *J*<sub>2</sub> = 4.8, 2H), 7.43 (d, *J* = 1.6, 2H), 7.53 (t, *J* = 6.4, 1H). <sup>13</sup>C NMR (100 MHz; CDCl<sub>3</sub>): δ = 110.9, 111.4, 120.2, 124.1, 124.3, 128.0, 128.4, 132.0, 132.8, 133.6, 141.7, 146.1. HRMS (ESI-TOF) Calcd for C<sub>14</sub>H<sub>11</sub>BrN<sub>3</sub>, [M+H]<sup>+</sup> 300.0137; Found 300.0141.

#### **1-(1-(4-(trifluoromethyl)phenyl)vinyl)-1*H*-benzo[*d*][1,2,3]triazole (3j).**

1-(trifluoromethyl)-4-vinylbenzene **1j** (0.5 mmol, 86.0 mg), benzotriazole **2a** (0.5 mmol, 59.6 mg), (PhSe)<sub>2</sub> (5% mol, 7.8 mg) and selectfluor (0.6 mmol, 212.4 mg). Then the reaction mixture was stirred in DME (2.0 mL) at 120 °C. Upon completion of the reaction (as monitored by TLC), the mixture was cooled to room temperature and quenched with water before being extracted with dichloromethane (5 × 3 mL). The combined organic layers were dried over anhydrous Na<sub>2</sub>SO<sub>4</sub> and concentrated under reduced pressure to give a residue, which was purified by flash column chromatography to give the desired product **3j** as white solid (77%, 111.4 mg), melting point: 83-84 °C.

<sup>1</sup>H NMR (400 MHz; CDCl<sub>3</sub>): δ = 5.89 (s, 1H), 5.92 (s, 1H), 7.13 (d, *J* = 7.6, 1H), 7.42-7.44 (m, 4H), 7.64 (d, *J* = 8.4, 2H), 8.13 (d, *J* = 7.2, 1H). <sup>13</sup>C NMR (100 MHz; CDCl<sub>3</sub>): δ = 110.8, 112.9 (*J*<sub>C-F</sub> = 209 Hz), 120.3, 123.8 (d, *J* = 272.9 Hz), 124.4, 125.8 (q, *J* = 3.7 Hz), 126.7, 128.2, 131.6 (q, *J* = 32.7 Hz), 132.7, 138.1, 141.4, 146.1. HRMS (ESI-TOF) Calcd for C<sub>15</sub>H<sub>11</sub>F<sub>3</sub>N<sub>3</sub>, [M+H]<sup>+</sup> 290.0905; Found 290.0909.

#### **1-(1-(2,6-dichlorophenyl)vinyl)-1*H*-benzo[*d*][1,2,3]triazole (3k).**



1,3-dichloro-2-vinylbenzene **1k** (0.5 mmol, 86.5 mg), benzotriazole **2a** (0.5 mmol, 59.6 mg), (PhSe)<sub>2</sub> (5% mol, 7.8 mg) and selectfluor (0.6 mmol, 212.4 mg). Then the reaction mixture was stirred in DME (2.0 mL) at 120 °C. Upon completion of the reaction (as monitored by TLC), the mixture was cooled to room temperature and quenched with water before being extracted with dichloromethane (5 × 3 mL). The combined organic layers were dried over anhydrous Na<sub>2</sub>SO<sub>4</sub> and concentrated under reduced pressure to give a residue, which was purified by flash column chromatography to give the desired product **3k** as white solid (73%, 105.9 mg), melting point: 91-92 °C.

<sup>1</sup>H NMR (400 MHz; CDCl<sub>3</sub>): δ = 5.50 (s, 1H), 6.26 (s, 1H), 7.24 (d, *J* = 8.4, 1H), 7.30-7.42 (m, 5H), 8.06 (dd, *J*<sub>1</sub> = 0.8, *J*<sub>2</sub> = 8.4, 1H). <sup>13</sup>C NMR (100 MHz; CDCl<sub>3</sub>): δ = 110.7, 111.9, 120.3, 124.3, 128.4, 131.0, 131.7, 133.2, 135.8, 136.9, 146.2. HRMS (ESI-TOF) Calcd for C<sub>14</sub>H<sub>10</sub>Cl<sub>2</sub>N<sub>3</sub>, [M+H]<sup>+</sup> 290.0252; Found 290.0258.

#### **1-(1-(*m*-tolyl)vinyl)-1*H*-benzo[*d*][1,2,3]triazole (3l).**

1-methyl-3-vinylbenzene **1l** (0.5 mmol, 59.1 mg), benzotriazole **2a** (0.5 mmol, 59.6 mg), (PhSe)<sub>2</sub> (5% mol, 7.8 mg) and selectfluor (0.6 mmol, 212.4 mg). Then the reaction mixture was stirred in DME (2.0 mL) at 120 °C. Upon completion of the reaction (as monitored by TLC), the mixture was cooled to room temperature and quenched with water before being extracted with dichloromethane (5 × 3 mL). The combined organic layers were dried over anhydrous Na<sub>2</sub>SO<sub>4</sub> and concentrated under reduced pressure to give a residue, which was purified by flash column chromatography to give the desired product **3l** as pale yellow liquid (85%, 100.0 mg).

<sup>1</sup>H NMR (400 MHz; CDCl<sub>3</sub>): δ = 2.33 (s, 3H), 5.75 (s, 1H), 5.78 (s, 1H), 7.07-7.11 (m, 3H), 7.25 (d, *J* = 3.6, 2H), 7.37 (dd, *J*<sub>1</sub> = 3.2, *J*<sub>2</sub> = 6.4, 2H), 8.11 (dd, *J*<sub>1</sub> = 1.2, *J*<sub>2</sub> = 4.0, 1H). <sup>13</sup>C NMR (100 MHz; CDCl<sub>3</sub>): δ = 21.4, 110.9, 111.3, 120.0, 124.1, 127.5, 127.7, 128.7, 130.6, 132.9, 134.6, 138.6, 142.7, 146.1. HRMS (ESI-TOF) Calcd for C<sub>15</sub>H<sub>14</sub>N<sub>3</sub>, [M+H]<sup>+</sup> 236.1188; Found 236.1184.

#### **1-(1-(*p*-tolyl)vinyl)-1*H*-benzo[*d*][1,2,3]triazole (3m).**

1-methyl-4-vinylbenzene **1m** (0.5 mmol, 59.1 mg), benzotriazole **2a** (0.5 mmol, 59.6 mg), (PhSe)<sub>2</sub> (5% mol, 7.8 mg) and selectfluor (0.6 mmol, 212.4 mg). Then the reaction mixture was stirred in DME (2.0 mL) at 120 °C. Upon completion of the reaction (as monitored by TLC), the mixture was cooled to room temperature and quenched with water before being extracted with dichloromethane (5 × 3 mL). The combined organic layers were dried over anhydrous Na<sub>2</sub>SO<sub>4</sub> and concentrated under reduced pressure to give a residue, which was purified by flash column chromatography to give the desired product **3m** as pale yellow liquid (83%, 97.6 mg). <sup>1</sup>H NMR (400 MHz; CDCl<sub>3</sub>): δ = 2.40 (s, 3H), 5.73 (s, 1H), 5.76 (s, 1H), 7.08 (d, *J* = 6.4, 1H), 7.20 (s, 4H), 7.37 (dd, *J*<sub>1</sub> = 3.2, *J*<sub>2</sub> = 6.4, 2H), 8.11-8.14 (m, 1H). <sup>13</sup>C NMR (100 MHz; CDCl<sub>3</sub>): δ = 21.3, 110.2, 111.3, 120.1, 124.1, 126.8, 127.6, 129.5, 131.8, 132.9, 139.9, 142.6, 146.1. HRMS (ESI-TOF) Calcd for C<sub>15</sub>H<sub>14</sub>N<sub>3</sub>, [M+H]<sup>+</sup> 236.1188; Found 236.1191.

**1-(1-(4-(*tert*-butyl)phenyl)vinyl)-1*H*-benzo[*d*][1,2,3]triazole (3n).**

1-(*tert*-butyl)-4-vinylbenzene **1n** (0.5 mmol, 80.1 mg), benzotriazole **2a** (0.5 mmol, 59.6 mg), (PhSe)<sub>2</sub> (5% mol, 7.8 mg) and selectfluor (0.6 mmol, 212.4 mg). Then the reaction mixture was stirred in DME (2.0 mL) at 120 °C. Upon completion of the reaction (as monitored by TLC), the mixture was cooled to room temperature and quenched with water before being extracted with dichloromethane (5 × 3 mL). The combined organic layers were dried over anhydrous Na<sub>2</sub>SO<sub>4</sub> and concentrated under reduced pressure to give a residue, which was purified by flash column chromatography to give the desired product **3n** as pale yellow liquid (79%, 109.6 mg). <sup>1</sup>H NMR (400 MHz; CDCl<sub>3</sub>): δ = 1.34 (s, 9H), 5.71 (s, 1H), 5.80 (s, 1H), 7.14 (d, *J* = 6.4, 1H), 7.22 (d, *J* = 8.4, 2H), 7.37-7.41 (m, 4H), 8.12 (d, *J* = 2.0, 1H). <sup>13</sup>C NMR (100 MHz; CDCl<sub>3</sub>): δ = 31.2, 34.8, 110.4, 111.2, 120.0, 124.1, 125.7, 126.5, 127.7, 131.7, 133.0, 142.5, 146.0, 153.1. HRMS (ESI-TOF) Calcd for C<sub>18</sub>H<sub>20</sub>N<sub>3</sub>, [M+H]<sup>+</sup> 278.1657; Found 278.1652.

**1-(1-(4-(chloromethyl)phenyl)vinyl)-1*H*-benzo[*d*][1,2,3]triazole (3o).**

1-(chloromethyl)-4-vinylbenzene **1o** (0.5 mmol, 76.3 mg), benzotriazole **2a** (0.5 mmol, 59.6 mg), (PhSe)<sub>2</sub> (5% mol, 7.8 mg) and selectfluor (0.6 mmol, 212.4 mg). Then the reaction mixture was stirred in DME (2.0 mL) at 120 °C. Upon completion of the reaction (as monitored by TLC), the mixture was cooled to room temperature and quenched with water before being extracted with dichloromethane (5 × 3 mL). The combined organic layers were dried over anhydrous Na<sub>2</sub>SO<sub>4</sub> and concentrated under reduced pressure to give a residue, which was purified by flash column chromatography to give the desired product **3o** as pale yellow liquid (76%, 102.5 mg). <sup>1</sup>H NMR (400 MHz; CDCl<sub>3</sub>): δ = 4.60 (s, 2H), 5.78 (s, 1H), 5.83 (d, *J* = 0.8, 1H), 7.11-7.13 (m, 1H), 7.28 (d, *J* = 8.0, 2H), 7.38-7.41 (m, 4H), 8.11 (t, *J* = 2.0, 1H). <sup>13</sup>C NMR (100 MHz; CDCl<sub>3</sub>): δ = 31.2, 34.8, 110.4, 111.2, 120.0, 124.1, 125.7, 126.5, 127.7, 131.7, 133.0, 142.5, 146.0, 153.1. HRMS (ESI-TOF) Calcd for C<sub>15</sub>H<sub>13</sub>ClN<sub>3</sub>, [M+H]<sup>+</sup> 270.0798; Found 270.0792.

#### **4-(1-(1*H*-benzo[*d*][1,2,3]triazol-1-yl)vinyl)phenyl acetate (3p).**

4-vinylphenyl acetate **1p** (0.5 mmol, 81.1 mg), benzotriazole **2a** (0.5 mmol, 59.6 mg), (PhSe)<sub>2</sub> (5% mol, 7.8 mg) and selectfluor (0.6 mmol, 212.4 mg). Then the reaction mixture was stirred in DME (2.0 mL) at 120 °C. Upon completion of the reaction (as monitored by TLC), the mixture was cooled to room temperature and quenched with water before being extracted with dichloromethane (5 × 3 mL). The combined organic layers were dried over anhydrous Na<sub>2</sub>SO<sub>4</sub> and concentrated under reduced pressure to give a residue, which was purified by flash column chromatography to give the desired product **3p** as white solid (69%, 96.4 mg), melting point: 95-96 °C.

<sup>1</sup>H NMR (400 MHz; CDCl<sub>3</sub>): δ = 2.30 (s, 3H), 5.75 (s, 1H), 5.79 (s, 1H), 7.11 (d, *J* = 6.8, 3H), 7.30 (d, *J* = 8.4, 2H), 7.37-7.39 (m, 2H), 8.09 (t, *J* = 2.4, 1H). <sup>13</sup>C NMR (100 MHz; CDCl<sub>3</sub>): δ = 21.1, 111.1, 111.3, 120.1, 122.1, 124.3, 128.0, 132.2, 132.8, 141.7, 146.0, 151.7, 169.1. HRMS (ESI-TOF) Calcd for C<sub>16</sub>H<sub>14</sub>N<sub>3</sub>O<sub>2</sub>, [M+H]<sup>+</sup> 280.1086; Found 280.1082.

#### **1-(1-(cyclohex-1-en-1-yl)vinyl)-1*H*-benzo[*d*][1,2,3]triazole (3q).**

cyclohexene **1q** (0.5 mmol, 41.1 mg), benzotriazole **2a** (0.5 mmol, 59.6 mg), (PhSe)<sub>2</sub> (5% mol, 7.8 mg) and selectfluor (0.6 mmol, 212.4 mg). Then the reaction mixture was stirred in DME (2.0 mL) at 120 °C. Upon completion of the reaction (as monitored by TLC), the mixture was cooled to room temperature and quenched with water before being extracted with dichloromethane (5 × 3 mL). The combined organic layers were dried over anhydrous Na<sub>2</sub>SO<sub>4</sub> and concentrated under reduced pressure to give a residue, which was purified by flash column chromatography to give the desired product **3q** as pale yellow liquid (72%, 81.1 mg).

<sup>1</sup>H NMR (400 MHz; CDCl<sub>3</sub>): δ = 1.79-1.82 (m, 2H), 1.94-1.97 (m, 2H), 2.36-2.38 (m, 2H), 2.78-2.80 (m, 2H), 6.19-6.21 (m, 1H), 7.40 (m, 1H), 7.47 (t, *J* = 7.6, 1H), 7.66 (d, *J* = 8.4, 1H). <sup>13</sup>C NMR (100 MHz; CDCl<sub>3</sub>): δ = 21.6, 22.4, 24.4, 27.6, 111.0, 120.0, 121.3, 124.0, 127.5, 131.9, 135.2, 146.0. HRMS (ESI-TOF) Calcd for C<sub>14</sub>H<sub>16</sub>N<sub>3</sub>, [M+H]<sup>+</sup> 226.1344; Found 226.1347.

**(*E*)-1-(1-(cyclooct-1-en-1-yl)vinyl)-1*H*-benzo[*d*][1,2,3]triazole (3r).**

(*Z*)-cyclooctene **1r** (0.5 mmol, 55.1 mg), benzotriazole **2a** (0.5 mmol, 59.6 mg), (PhSe)<sub>2</sub> (5% mol, 7.8 mg) and selectfluor (0.6 mmol, 212.4 mg). Then the reaction mixture was stirred in DME (2.0 mL) at 120 °C. Upon completion of the reaction (as monitored by TLC), the mixture was cooled to room temperature and quenched with water before being extracted with dichloromethane (5 × 3 mL). The combined organic layers were dried over anhydrous Na<sub>2</sub>SO<sub>4</sub> and concentrated under reduced pressure to give a residue, which was purified by flash column chromatography to give the desired product **3r** as pale yellow liquid (70%, 88.7 mg).

<sup>1</sup>H NMR (400 MHz; CDCl<sub>3</sub>): δ = 1.68-1.75 (m, 8H), 2.41-2.46 (m, 2H), 2.93-2.93 (m, 2H), 6.11 (t, *J* = 8.4, 1H), 7.38 (t, *J* = 7.2, 1H), 7.47-7.51 (m, 1H), 7.65 (d, *J* = 8.4, 1H), 8.07 (d, *J* = 8.4, 1H). <sup>13</sup>C NMR (100 MHz; CDCl<sub>3</sub>): δ = 26.0, 26.1, 26.5, 28.5, 29.1, 29.9, 111.0, 120.0, 123.9, 124.2, 127.5, 132.4, 137.4, 145.9. HRMS (ESI-TOF) Calcd for C<sub>16</sub>H<sub>20</sub>N<sub>3</sub>, [M+H]<sup>+</sup> 254.1657; Found 254.1656.

**5,6-dimethyl-1-(1-phenylvinyl)-1*H*-benzo[*d*][1,2,3]triazole (3s).**

styrene **1a** (0.5 mmol, 54.0 mg), 5,6-dimethyl-2*H*-benzo[*d*][1,2,3]triazole (0.5 mmol, 73.6 mg), (PhSe)<sub>2</sub> (5% mol, 7.8 mg) and selectfluor (0.6 mmol, 212.4 mg). Then the reaction mixture was stirred in DME (2.0 mL) at 120 °C. Upon completion of the reaction (as monitored by TLC), the mixture was cooled to room temperature and quenched with water before being extracted with dichloromethane (5 × 3 mL). The combined organic layers were dried over anhydrous Na<sub>2</sub>SO<sub>4</sub> and concentrated under reduced pressure to give a residue, which was purified by flash column chromatography to give the desired product **3s** as white solid (79%, 98.5 mg), melting point: 81-82 °C.

<sup>1</sup>H NMR (400 MHz; CDCl<sub>3</sub>): δ = 2.30 (s, 3H), 2.40 (s, 3H), 5.73 (s, 1H), 5.78 (s, 1H), 6.86 (s, 1H), 7.29 (d, *J* = 7.6, 2H), 7.36-7.42 (m, 3H), 7.85 (s, 1H). <sup>13</sup>C NMR (100 MHz; CDCl<sub>3</sub>): δ = 20.3, 20.9, 110.5, 110.7, 119.1, 126.8, 128.7, 129.6, 132.0, 134.0, 138.2, 142.7, 145.3. HRMS (ESI-TOF) Calcd for C<sub>16</sub>H<sub>16</sub>N<sub>3</sub>, [M+H]<sup>+</sup> 250.1344; Found 250.1340.

#### **2-(1-phenylvinyl)-2*H*-benzo[*d*][1,2,3]triazole (4a).**

styrene **1a** (0.5 mmol, 52.0 mg), benzotriazole **2a** (0.5 mmol, 59.6 mg), (PhSe)<sub>2</sub> (5% mol, 7.8 mg), Me<sub>3</sub>SiH (0.5 mmol, 37.1 mg) and K<sub>2</sub>S<sub>2</sub>O<sub>8</sub> (0.6 mmol, 162.0 mg). Then the reaction mixture was stirred in dioxane (2.0 mL) at 120 °C. Upon completion of the reaction (as monitored by TLC), the mixture was cooled to room temperature and quenched with water before being extracted with dichloromethane (5 × 3 mL). The combined organic layers were dried over anhydrous Na<sub>2</sub>SO<sub>4</sub> and concentrated under reduced pressure to give a residue, which was purified by flash column chromatography to give the desired product **4a** as pale yellow liquid (79%, 87.3 mg).

<sup>1</sup>H NMR (400 MHz; CDCl<sub>3</sub>): δ = 5.67 (s, 1H), 6.21 (s, 1H), 7.42-7.45 (m, 7H), 7.92 (dd, *J*<sub>1</sub> = 2.8, *J*<sub>2</sub> = 6.8, 2H). <sup>13</sup>C NMR (100 MHz; CDCl<sub>3</sub>): δ = 111.0, 118.5, 127.2, 128.4, 129.6, 134.6, 144.7, 147.1. HRMS (ESI-TOF) Calcd for C<sub>14</sub>H<sub>12</sub>N<sub>3</sub>, [M+H]<sup>+</sup> 222.1031; Found 222.1037.

#### **2-(1-(2-fluorophenyl)vinyl)-2*H*-benzo[*d*][1,2,3]triazole (4b).**

1-fluoro-2-vinylbenzene **1b** (0.5 mmol, 61.0 mg), benzotriazole **2a** (0.5 mmol, 59.6 mg), (PhSe)<sub>2</sub> (5% mol, 7.8 mg), Me<sub>3</sub>SiH (0.5 mmol, 37.1 mg) and K<sub>2</sub>S<sub>2</sub>O<sub>8</sub> (0.6 mmol, 162.0 mg). Then the reaction mixture was stirred in dioxane (2.0 mL) at 120 °C. Upon completion of the reaction (as monitored by TLC), the mixture was cooled to room temperature and quenched with water before being extracted with dichloromethane (5 × 3 mL). The combined organic layers were dried over anhydrous Na<sub>2</sub>SO<sub>4</sub> and concentrated under reduced pressure to give a residue, which was purified by flash column chromatography to give the desired product **4b** as white solid (74%, 88.5 mg), melting point: 67-68 °C.

<sup>1</sup>H NMR (400 MHz; CDCl<sub>3</sub>): δ = 5.63 (s, 1H), 6.50 (s, 1H), 7.14 (t, *J* = 8.4, 1H), 7.27 (d, *J* = 7.2, 1H), 7.40 (dd, *J*<sub>1</sub> = 3.2, *J*<sub>2</sub> = 6.8, 2H), 7.47 (t, *J* = 7.2, 2H), 7.88 (d, *J* = 6.4, 2H). <sup>13</sup>C NMR (100 MHz; CDCl<sub>3</sub>): δ = 112.6, 115.8, 116.1, 118.5, 124.2, 127.2, 131.1, 131.2 (d, *J* = 2.5 Hz), 131.4 (d, *J* = 8.3 Hz), 131.5, 141.9, 144.7, 159.0, 160.2 (d, *J* = 251.4 Hz), 161.5. HRMS (ESI-TOF) Calcd for C<sub>14</sub>H<sub>11</sub>FN<sub>3</sub>, [M+H]<sup>+</sup> 240.0937; Found 240.0942.

#### **2-(1-(4-fluorophenyl)vinyl)-2H-benzo[*d*][1,2,3]triazole (4c).**

1-fluoro-4-vinylbenzene **1c** (0.5 mmol, 61.0 mg), benzotriazole **2a** (0.5 mmol, 59.6 mg), (PhSe)<sub>2</sub> (5% mol, 7.8 mg), Me<sub>3</sub>SiH (0.5 mmol, 37.1 mg) and K<sub>2</sub>S<sub>2</sub>O<sub>8</sub> (0.6 mmol, 162.0 mg). Then the reaction mixture was stirred in dioxane (2.0 mL) at 120 °C. Upon completion of the reaction (as monitored by TLC), the mixture was cooled to room temperature and quenched with water before being extracted with dichloromethane (5 × 3 mL). The combined organic layers were dried over anhydrous Na<sub>2</sub>SO<sub>4</sub> and concentrated under reduced pressure to give a residue, which was purified by flash column chromatography to give the desired product **4c** as pale yellow liquid (70%, 83.7 mg).

<sup>1</sup>H NMR (400 MHz; CDCl<sub>3</sub>): δ = 5.61 (s, 1H), 6.22 (s, 1H), 7.15 (t, *J* = 8.4, 2H), 7.41-7.45 (m, 4H), 7.91 (dd, *J*<sub>1</sub> = 2.8, *J*<sub>2</sub> = 6.8, 2H). <sup>13</sup>C NMR (100 MHz; CDCl<sub>3</sub>): δ = 110.8, 115.4 (d, *J* = 21.9 Hz), 115.6, 118.4, 127.4, 130.3 (d, *J* = 8.5 Hz), 130.7 (d, *J* = 3.4 Hz), 144.7, 146.1, 162.2, 163.4 (d, *J* = 249.8 Hz), 164.7. HRMS (ESI-TOF) Calcd

for C<sub>14</sub>H<sub>11</sub>FN<sub>3</sub>, [M+H]<sup>+</sup> 240.0937; Found 240.0941.

**2-(1-(2-chlorophenyl)vinyl)-2H-benzo[d][1,2,3]triazole (4d).**

1-chloro-2-vinylbenzene **1d** (0.5 mmol, 69.3 mg), benzotriazole **2a** (0.5 mmol, 59.6 mg), (PhSe)<sub>2</sub> (5% mol, 7.8 mg), Me<sub>3</sub>SiH (0.5 mmol, 37.1 mg) and K<sub>2</sub>S<sub>2</sub>O<sub>8</sub> (0.6 mmol, 162.0 mg). Then the reaction mixture was stirred in dioxane (2.0 mL) at 120 °C. Upon completion of the reaction (as monitored by TLC), the mixture was cooled to room temperature and quenched with water before being extracted with dichloromethane (5 × 3 mL). The combined organic layers were dried over anhydrous Na<sub>2</sub>SO<sub>4</sub> and concentrated under reduced pressure to give a residue, which was purified by flash column chromatography to give the desired product **4d** as pale yellow liquid (71%, 90.8 mg).

<sup>1</sup>H NMR (400 MHz; CDCl<sub>3</sub>): δ = 5.52 (s, 1H), 6.56 (s, 1H), 7.38-7.46 (m, 5H), 7.56 (dd, *J*<sub>1</sub> = 2.0, *J*<sub>2</sub> = 6.8, 1H), 7.87 (d, *J* = 3.2, 2H). <sup>13</sup>C NMR (100 MHz; CDCl<sub>3</sub>): δ = 111.9, 118.5, 126.9, 127.2, 129.8, 130.8, 131.8, 134.0, 134.1, 144.6, 144.8. HRMS (ESI-TOF) Calcd for C<sub>14</sub>H<sub>11</sub>ClN<sub>3</sub>, [M+H]<sup>+</sup> 256.0642; Found 256.0640.

**2-(1-(3-chlorophenyl)vinyl)-2H-benzo[d][1,2,3]triazole (4e).**

1-chloro-3-vinylbenzene **1e** (0.5 mmol, 69.3 mg), benzotriazole **2a** (0.5 mmol, 59.6 mg), (PhSe)<sub>2</sub> (5% mol, 7.8 mg), Me<sub>3</sub>SiH (0.5 mmol, 37.1 mg) and K<sub>2</sub>S<sub>2</sub>O<sub>8</sub> (0.6 mmol, 162.0 mg). Then the reaction mixture was stirred in dioxane (2.0 mL) at 120 °C. Upon completion of the reaction (as monitored by TLC), the mixture was cooled to room temperature and quenched with water before being extracted with dichloromethane (5 × 3 mL). The combined organic layers were dried over anhydrous Na<sub>2</sub>SO<sub>4</sub> and concentrated under reduced pressure to give a residue, which was purified by flash column chromatography to give the desired product **4e** as pale yellow liquid (73%, 93.3 mg).

<sup>1</sup>H NMR (400 MHz; CDCl<sub>3</sub>): δ = 5.67 (s, 1H), 6.26 (s, 1H), 7.34 (q, *J* = 7.6, 2H), 7.43-7.47 (m, 4H), 7.91 (dd, *J*<sub>1</sub> = 2.8, *J*<sub>2</sub> = 6.4, 2H). <sup>13</sup>C NMR (100 MHz; CDCl<sub>3</sub>): δ = 111.8, 118.5, 124.6, 126.5, 127.4, 128.4, 129.7, 134.4, 136.3, 144.7, 145.8. HRMS

(ESI-TOF) Calcd for C<sub>14</sub>H<sub>11</sub>ClN<sub>3</sub>, [M+H]<sup>+</sup> 256.0642; Found 256.0649.

**2-(1-(4-chlorophenyl)vinyl)-2H-benzo[d][1,2,3]triazole (4f).**

1-chloro-4-vinylbenzene **1f** (0.5 mmol, 69.3 mg), benzotriazole **2a** (0.5 mmol, 59.6 mg), (PhSe)<sub>2</sub> (5% mol, 7.8 mg), Me<sub>3</sub>SiH (0.5 mmol, 37.1 mg) and K<sub>2</sub>S<sub>2</sub>O<sub>8</sub> (0.6 mmol, 162.0 mg). Then the reaction mixture was stirred in dioxane (2.0 mL) at 120 °C. Upon completion of the reaction (as monitored by TLC), the mixture was cooled to room temperature and quenched with water before being extracted with dichloromethane (5 × 3 mL). The combined organic layers were dried over anhydrous Na<sub>2</sub>SO<sub>4</sub> and concentrated under reduced pressure to give a residue, which was purified by flash column chromatography to give the desired product **4f** as white solid (75%, 95.9 mg), melting point: 156-157 °C.

<sup>1</sup>H NMR (400 MHz; CDCl<sub>3</sub>): δ = 5.65 (s, 1H), 6.24 (s, 1H), 7.39-7.44 (m, 6H), 7.90 (dd, *J*<sub>1</sub> = 3.2, *J*<sub>2</sub> = 6.8, 2H). <sup>13</sup>C NMR (100 MHz; CDCl<sub>3</sub>): δ = 111.2, 118.4, 127.4, 128.7, 129.6, 133.0, 135.6, 144.7, 146.0. HRMS (ESI-TOF) Calcd for C<sub>14</sub>H<sub>11</sub>ClN<sub>3</sub>, [M+H]<sup>+</sup> 256.0642; Found 256.0648.

**2-(1-(2-bromophenyl)vinyl)-2H-benzo[d][1,2,3]triazole (4g).**

1-bromo-2-vinylbenzene **1g** (0.5 mmol, 91.5 mg), benzotriazole **2a** (0.5 mmol, 59.6 mg), (PhSe)<sub>2</sub> (5% mol, 7.8 mg), Me<sub>3</sub>SiH (0.5 mmol, 37.1 mg) and K<sub>2</sub>S<sub>2</sub>O<sub>8</sub> (0.6 mmol, 162.0 mg). Then the reaction mixture was stirred in dioxane (2.0 mL) at 120 °C. Upon completion of the reaction (as monitored by TLC), the mixture was cooled to room temperature and quenched with water before being extracted with dichloromethane (5 × 3 mL). The combined organic layers were dried over anhydrous Na<sub>2</sub>SO<sub>4</sub> and concentrated under reduced pressure to give a residue, which was purified by flash column chromatography to give the desired product **4g** as pale yellow liquid (68%, 102.1 mg).

<sup>1</sup>H NMR (400 MHz; CDCl<sub>3</sub>): δ = 5.50 (s, 1H), 5.67 (s, 1H), 7.36-7.41 (m, 3H), 7.56-7.58 (m, 2H), 7.65 (d, *J* = 8.0, 1H), 7.89 (t, *J* = 3.6, 2H). <sup>13</sup>C NMR (100 MHz; CDCl<sub>3</sub>): δ = 111.7, 118.5, 123.8, 127.3, 127.6, 130.9, 132.1, 133.0, 136.0, 144.8, 145.8.



HRMS (ESI-TOF) Calcd for C<sub>14</sub>H<sub>11</sub>BrN<sub>3</sub>, [M+H]<sup>+</sup> 300.0136; Found 300.0144.

**2-(1-(3-bromophenyl)vinyl)-2H-benzo[d][1,2,3]triazole (4h).**

1-bromo-3-vinylbenzene **1h** (0.5 mmol, 91.5 mg), benzotriazole **2a** (0.5 mmol, 59.6 mg), (PhSe)<sub>2</sub> (5% mol, 7.8 mg), Me<sub>3</sub>SiH (0.5 mmol, 37.1 mg) and K<sub>2</sub>S<sub>2</sub>O<sub>8</sub> (0.6 mmol, 162.0 mg). Then the reaction mixture was stirred in dioxane (2.0 mL) at 120 °C. Upon completion of the reaction (as monitored by TLC), the mixture was cooled to room temperature and quenched with water before being extracted with dichloromethane (5 × 3 mL). The combined organic layers were dried over anhydrous Na<sub>2</sub>SO<sub>4</sub> and concentrated under reduced pressure to give a residue, which was purified by flash column chromatography to give the desired product **4h** as white solid (62%, 93.0 mg), melting point: 125-126 °C.

<sup>1</sup>H NMR (400 MHz; CDCl<sub>3</sub>): δ = 5.66 (s, 1H), 6.26 (s, 1H), 7.29-7.44 (m, 4H), 7.60 (d, *J* = 7.6, 2H), 7.90 (s, 2H). <sup>13</sup>C NMR (100 MHz; CDCl<sub>3</sub>): δ = 111.8, 118.5, 122.5, 127.0, 127.4, 129.9, 131.3, 132.5, 136.7, 144.7, 145.7. HRMS (ESI-TOF) Calcd for C<sub>14</sub>H<sub>11</sub>BrN<sub>3</sub>, [M+H]<sup>+</sup> 300.0136; Found 300.0141.

**2-(1-(4-bromophenyl)vinyl)-2H-benzo[d][1,2,3]triazole (4i).**

1-bromo-4-vinylbenzene **1i** (0.5 mmol, 91.5 mg), benzotriazole **2a** (0.5 mmol, 59.6 mg), (PhSe)<sub>2</sub> (5% mol, 7.8 mg), Me<sub>3</sub>SiH (0.5 mmol, 37.1 mg) and K<sub>2</sub>S<sub>2</sub>O<sub>8</sub> (0.6 mmol, 162.0 mg). Then the reaction mixture was stirred in dioxane (2.0 mL) at 120 °C. Upon completion of the reaction (as monitored by TLC), the mixture was cooled to room temperature and quenched with water before being extracted with dichloromethane (5 × 3 mL). The combined organic layers were dried over anhydrous Na<sub>2</sub>SO<sub>4</sub> and concentrated under reduced pressure to give a residue, which was purified by flash column chromatography to give the desired product **4i** as pale yellow liquid (70%, 105.1 mg).

<sup>1</sup>H NMR (400 MHz; CDCl<sub>3</sub>): δ = 5.65 (s, 1H), 6.24 (d, *J* = 0.8, 1H), 7.33 (d, *J* = 8.4, 2H), 7.43 (dd, *J*<sub>1</sub> = 2.8, *J*<sub>2</sub> = 6.4, 2H), 7.57 (d, *J* = 8.8, 2H), 7.89 (dd, *J*<sub>1</sub> = 3.2, *J*<sub>2</sub> = 6.8, 2H). <sup>13</sup>C NMR (100 MHz; CDCl<sub>3</sub>): δ = 111.2, 118.4, 123.9, 127.4, 129.9, 131.6,

133.5, 144.7, 146.1. HRMS (ESI-TOF) Calcd for C<sub>14</sub>H<sub>11</sub>BrN<sub>3</sub>, [M+H]<sup>+</sup> 300.0136; Found 300.0139.

**2-(1-(4-(trifluoromethyl)phenyl)vinyl)-2H-benzo[d][1,2,3]triazole (4j).**

1-(trifluoromethyl)-4-vinylbenzene **1j** (0.5 mmol, 86.0 mg), benzotriazole **2a** (0.5 mmol, 59.6 mg), (PhSe)<sub>2</sub> (5% mol, 7.8 mg), Me<sub>3</sub>SiH (0.5 mmol, 37.1 mg) and K<sub>2</sub>S<sub>2</sub>O<sub>8</sub> (0.6 mmol, 162.0 mg). Then the reaction mixture was stirred in dioxane (2.0 mL) at 120 °C. Upon completion of the reaction (as monitored by TLC), the mixture was cooled to room temperature and quenched with water before being extracted with dichloromethane (5 × 3 mL). The combined organic layers were dried over anhydrous Na<sub>2</sub>SO<sub>4</sub> and concentrated under reduced pressure to give a residue, which was purified by flash column chromatography to give the desired product **4j** as white solid (72%, 104.1 mg), melting point: 89-90 °C.

<sup>1</sup>H NMR (400 MHz; CDCl<sub>3</sub>): δ = 5.72 (s, 1H), 6.35 (s, 1H), 7.44 (dd, *J*<sub>1</sub> = 3.2, *J*<sub>2</sub> = 6.8, 2H), 7.59 (d, *J* = 4.4, 2H), 7.70 (d, *J* = 8.0, 2H), 7.91 (dd, *J*<sub>1</sub> = 3.2, *J*<sub>2</sub> = 6.8, 2H). <sup>13</sup>C NMR (100 MHz; CDCl<sub>3</sub>): δ = 111.2, 118.1, 118.4, 123.8 (d, *J* = 272.9 Hz), 125.4 (q, *J* = 3.7 Hz), 127.5, 127.6, 128.8, 131.4 (q, *J* = 32.5 Hz), 138.0, 144.8, 145.8. HRMS (ESI-TOF) Calcd for C<sub>15</sub>H<sub>11</sub>F<sub>3</sub>N<sub>3</sub>, [M+H]<sup>+</sup> 290.0905; Found 290.0911.

**2-(1-(4-nitrophenyl)vinyl)-2H-benzo[d][1,2,3]triazole (4k).**

1-nitro-4-vinylbenzene **1k** (0.5 mmol, 74.5 mg), benzotriazole **2a** (0.5 mmol, 59.6 mg), (PhSe)<sub>2</sub> (5% mol, 7.8 mg), Me<sub>3</sub>SiH (0.5 mmol, 37.1 mg) and K<sub>2</sub>S<sub>2</sub>O<sub>8</sub> (0.6 mmol, 162.0 mg). Then the reaction mixture was stirred in dioxane (2.0 mL) at 120 °C. Upon completion of the reaction (as monitored by TLC), the mixture was cooled to room temperature and quenched with water before being extracted with dichloromethane (5 × 3 mL). The combined organic layers were dried over anhydrous Na<sub>2</sub>SO<sub>4</sub> and concentrated under reduced pressure to give a residue, which was purified by flash column chromatography to give the desired product **4k** as white solid (65%, 86.5 mg), melting point: 110-111 °C.

<sup>1</sup>H NMR (400 MHz; CDCl<sub>3</sub>): δ = 5.78 (s, 1H), 6.43 (s, 1H), 7.45 (dd, *J*<sub>1</sub> = 3.2, *J*<sub>2</sub> = 6.8,

2H), 7.65 (d,  $J = 8.8$ , 2H), 7.89 (dd,  $J_1 = 3.2$ ,  $J_2 = 6.8$ , 2H), 8.30 (d,  $J = 8.8$ , 2H).  $^{13}\text{C}$  NMR (100 MHz;  $\text{CDCl}_3$ ):  $\delta = 113.2, 118.4, 123.7, 127.7, 129.4, 140.6, 144.8, 145.1, 148.3$ . HRMS (ESI-TOF) Calcd for  $\text{C}_{14}\text{H}_{11}\text{O}_2\text{N}_4$ ,  $[\text{M}+\text{H}]^+$  267.0882; Found 267.0887.

**2-(1-(2,6-dichlorophenyl)vinyl)-2H-benzo[d][1,2,3]triazole (4l).**

1,3-dichloro-2-vinylbenzene **1l** (0.5 mmol, 86.5 mg), benzotriazole **2a** (0.5 mmol, 59.6 mg),  $(\text{PhSe})_2$  (5% mol, 7.8 mg), NIS (0.5 mmol, 112.5 mg),  $\text{Me}_3\text{SiH}$  (0.5 mmol, 37.1 mg) and  $\text{K}_2\text{S}_2\text{O}_8$  (0.6 mmol, 162.0 mg). Then the reaction mixture was stirred in dioxane (2.0 mL) at 120 °C. Upon completion of the reaction (as monitored by TLC), the mixture was cooled to room temperature and quenched with water before being extracted with dichloromethane ( $5 \times 3$  mL). The combined organic layers were dried over anhydrous  $\text{Na}_2\text{SO}_4$  and concentrated under reduced pressure to give a residue, which was purified by flash column chromatography to give the desired product **4l** as white solid (80%, 116.1 mg), melting point: 150-151 °C.

$^1\text{H}$  NMR (400 MHz;  $\text{CDCl}_3$ ):  $\delta = 5.51$  (d,  $J = 0.8$ , 1H), 6.85 (s, 1H), 7.36-7.40 (m, 3H), 7.47 (d,  $J = 7.6$ , 2H), 7.85-7.88 (m, 2H).  $^{13}\text{C}$  NMR (100 MHz;  $\text{CDCl}_3$ ):  $\delta = 112.5, 118.5, 127.3, 128.1, 130.8, 133.0, 136.0, 140.6, 144.8$ . HRMS (ESI-TOF) Calcd for  $\text{C}_{14}\text{H}_{10}\text{Cl}_2\text{N}_3$ ,  $[\text{M}+\text{H}]^+$  290.0252; Found 290.0257.

**2-(1-(naphthalen-2-yl)vinyl)-2H-benzo[d][1,2,3]triazole (4m).**

2-vinylnaphthalene **1m** (0.5 mmol, 72.1 mg), benzotriazole **2a** (0.5 mmol, 59.6 mg),  $(\text{PhSe})_2$  (5% mol, 7.8 mg),  $\text{Me}_3\text{SiH}$  (0.5 mmol, 37.1 mg) and  $\text{K}_2\text{S}_2\text{O}_8$  (0.6 mmol, 162.0 mg). Then the reaction mixture was stirred in dioxane (2.0 mL) at 120 °C. Upon completion of the reaction (as monitored by TLC), the mixture was cooled to room temperature and quenched with water before being extracted with dichloromethane ( $5 \times 3$  mL). The combined organic layers were dried over anhydrous  $\text{Na}_2\text{SO}_4$  and concentrated under reduced pressure to give a residue, which was purified by flash column chromatography to give the desired product **4m** as pale yellow liquid (76%, 102.7 mg).

$^1\text{H}$  NMR (400 MHz;  $\text{CDCl}_3$ ):  $\delta = 5.80$  (s, 1H), 6.31 (s, 1H), 7.44 (dd,  $J_1 = 3.2$ ,  $J_2 = 6.4$ ,

2H), 7.53 (dd,  $J_1 = 3.6$ ,  $J_2 = 7.2$ , 2H), 7.89-7.99 (m, 7H).  $^{13}\text{C}$  NMR (100 MHz;  $\text{CDCl}_3$ ):  $\delta = 111.4, 118.5, 125.4, 126.5, 127.0, 127.3, 127.7, 128.0, 128.1, 128.5, 132.0, 133.0, 133.7, 144.7, 147.2$ . HRMS (ESI-TOF) Calcd for  $\text{C}_{18}\text{H}_{14}\text{N}_3$ ,  $[\text{M}+\text{H}]^+$  272.1188; Found 272.1182.

#### **2-(1-(*m*-tolyl)vinyl)-2*H*-benzo[*d*][1,2,3]triazole (4n).**

1-methyl-3-vinylbenzene **1n** (0.5 mmol, 59.7 mg), benzotriazole **2a** (0.5 mmol, 59.6 mg),  $(\text{PhSe})_2$  (5% mol, 7.8 mg),  $\text{Me}_3\text{SiH}$  (0.5 mmol, 37.1 mg) and  $\text{K}_2\text{S}_2\text{O}_8$  (0.6 mmol, 162.0 mg). Then the reaction mixture was stirred in dioxane (2.0 mL) at 120 °C. Upon completion of the reaction (as monitored by TLC), the mixture was cooled to room temperature and quenched with water before being extracted with dichloromethane (5  $\times$  3 mL). The combined organic layers were dried over anhydrous  $\text{Na}_2\text{SO}_4$  and concentrated under reduced pressure to give a residue, which was purified by flash column chromatography to give the desired product **4n** as pale yellow liquid (75%, 88.2 mg).

$^1\text{H}$  NMR (400 MHz;  $\text{CDCl}_3$ ):  $\delta = 2.39$  (s, 3H), 5.65 (s, 1H), 6.18 (s, 1H), 7.24 (t,  $J = 8.0$ , 3H), 7.32 (d,  $J = 7.6$ , 1H), 7.42 (dd,  $J_1 = 3.2$ ,  $J_2 = 6.4$ , 2H), 7.92 (dd,  $J_1 = 3.2$ ,  $J_2 = 6.8$ , 2H).  $^{13}\text{C}$  NMR (100 MHz;  $\text{CDCl}_3$ ):  $\delta = 21.4, 110.9, 118.5, 125.4, 127.2, 128.3, 128.8, 130.4, 134.6, 138.1, 144.7, 147.3$ . HRMS (ESI-TOF) Calcd for  $\text{C}_{15}\text{H}_{14}\text{N}_3$ ,  $[\text{M}+\text{H}]^+$  236.1188; Found 236.1192.

#### **2-(1-(*p*-tolyl)vinyl)-2*H*-benzo[*d*][1,2,3]triazole (4o).**

1-methyl-4-vinylbenzene **1o** (0.5 mmol, 59.7 mg), benzotriazole **2a** (0.5 mmol, 59.6 mg),  $(\text{PhSe})_2$  (5% mol, 7.8 mg),  $\text{Me}_3\text{SiH}$  (0.5 mmol, 37.1 mg) and  $\text{K}_2\text{S}_2\text{O}_8$  (0.6 mmol, 162.0 mg). Then the reaction mixture was stirred in dioxane (2.0 mL) at 120 °C. Upon completion of the reaction (as monitored by TLC), the mixture was cooled to room temperature and quenched with water before being extracted with dichloromethane (5  $\times$  3 mL). The combined organic layers were dried over anhydrous  $\text{Na}_2\text{SO}_4$  and concentrated under reduced pressure to give a residue, which was purified by flash column chromatography to give the desired product **4o** as pale yellow liquid (79%,

92.9 mg).

<sup>1</sup>H NMR (400 MHz; CDCl<sub>3</sub>): δ = 2.42 (s, 3H), 5.63 (s, 1H), 6.16 (s, 1H), 7.24 (d, *J* = 8.0, 2H), 7.34 (d, *J* = 8.4, 2H), 7.42 (dd, *J*<sub>1</sub> = 2.8, *J*<sub>2</sub> = 6.8, 2H), 7.92 (dd, *J*<sub>1</sub> = 3.2, *J*<sub>2</sub> = 6.8, 2H). <sup>13</sup>C NMR (100 MHz; CDCl<sub>3</sub>): δ = 21.3, 110.3, 118.5, 127.1, 128.2, 129.1, 131.8, 139.7, 144.6, 147.1. HRMS (ESI-TOF) Calcd for C<sub>15</sub>H<sub>14</sub>N<sub>3</sub>, [M+H]<sup>+</sup> 236.1188; Found 236.1195.

#### **2-(1-(4-(*tert*-butyl)phenyl)vinyl)-2*H*-benzo[*d*][1,2,3]triazole (4p).**

1-(*tert*-butyl)-4-vinylbenzene **1p** (0.5 mmol, 80.1 mg), benzotriazole **2a** (0.5 mmol, 59.6 mg), (PhSe)<sub>2</sub> (5% mol, 7.8 mg), Me<sub>3</sub>SiH (0.5 mmol, 37.1 mg) and K<sub>2</sub>S<sub>2</sub>O<sub>8</sub> (0.6 mmol, 162.0 mg). Then the reaction mixture was stirred in dioxane (2.0 mL) at 120 °C. Upon completion of the reaction (as monitored by TLC), the mixture was cooled to room temperature and quenched with water before being extracted with dichloromethane (5 × 3 mL). The combined organic layers were dried over anhydrous Na<sub>2</sub>SO<sub>4</sub> and concentrated under reduced pressure to give a residue, which was purified by flash column chromatography to give the desired product **4p** as pale yellow liquid (74%, 102.6 mg).

<sup>1</sup>H NMR (400 MHz; CDCl<sub>3</sub>): δ = 1.36 (s, 9H), 5.65 (s, 1H), 6.15 (s, 1H), 7.38-7.47 (m, 6H), 7.91 (dd, *J*<sub>1</sub> = 3.2, *J*<sub>2</sub> = 6.4, 2H). <sup>13</sup>C NMR (100 MHz; CDCl<sub>3</sub>): δ = 31.2, 34.7, 110.5, 118.5, 125.4, 127.1, 127.9, 131.6, 144.6, 147.1, 152.7. HRMS (ESI-TOF) Calcd for C<sub>18</sub>H<sub>20</sub>N<sub>3</sub>, [M+H]<sup>+</sup> 278.1657; Found 278.1651.

#### **2-(1-(4-(chloromethyl)phenyl)vinyl)-2*H*-benzo[*d*][1,2,3]triazole (4q).**

1-(chloromethyl)-4-vinylbenzene **1q** (0.5 mmol, 76.3 mg), benzotriazole **2a** (0.5 mmol, 59.6 mg), (PhSe)<sub>2</sub> (5% mol, 7.8 mg), Me<sub>3</sub>SiH (0.5 mmol, 37.1 mg) and K<sub>2</sub>S<sub>2</sub>O<sub>8</sub> (0.6 mmol, 162.0 mg). Then the reaction mixture was stirred in dioxane (2.0 mL) at 120 °C. Upon completion of the reaction (as monitored by TLC), the mixture was cooled to room temperature and quenched with water before being extracted with dichloromethane (5 × 3 mL). The combined organic layers were dried over anhydrous Na<sub>2</sub>SO<sub>4</sub> and concentrated under reduced pressure to give a residue, which was

purified by flash column chromatography to give the desired product **4q** as pale yellow liquid (70%, 94.4 mg).

<sup>1</sup>H NMR (400 MHz; CDCl<sub>3</sub>): δ = 4.64 (s, 2H), 5.67 (s, 1H), 6.24 (s, 1H), 7.42-7.46 (m, 6H), 7.90 (dd, *J*<sub>1</sub> = 3.2, *J*<sub>2</sub> = 6.4, 2H). <sup>13</sup>C NMR (100 MHz; CDCl<sub>3</sub>): δ = 45.6, 111.3, 118.4, 127.3, 128.6, 128.7, 134.6, 138.7, 144.7, 146.5. HRMS (ESI-TOF) Calcd for C<sub>15</sub>H<sub>13</sub>ClN<sub>3</sub>, [M+H]<sup>+</sup> 270.0798; Found 270.0793.

#### **4-(1-(2*H*-benzo[*d*][1,2,3]triazol-2-yl)vinyl)phenyl acetate (4r).**

4-vinylphenyl acetate **1r** (0.5 mmol, 81.1 mg), benzotriazole **2a** (0.5 mmol, 59.6 mg), (PhSe)<sub>2</sub> (5% mol, 7.8 mg), Me<sub>3</sub>SiH (0.5 mmol, 37.1 mg) and K<sub>2</sub>S<sub>2</sub>O<sub>8</sub> (0.6 mmol, 162.0 mg). Then the reaction mixture was stirred in dioxane (2.0 mL) at 120 °C. Upon completion of the reaction (as monitored by TLC), the mixture was cooled to room temperature and quenched with water before being extracted with dichloromethane (5 × 3 mL). The combined organic layers were dried over anhydrous Na<sub>2</sub>SO<sub>4</sub> and concentrated under reduced pressure to give a residue, which was purified by flash column chromatography to give the desired product **4r** as white solid (67%, 93.6 mg), melting point: 90-91 °C.

<sup>1</sup>H NMR (400 MHz; CDCl<sub>3</sub>): δ = 2.33 (s, 3H), 6.56 (s, 1H), 6.22 (s, 1H), 7.17 (d, *J* = 8.4, 2H), 7.42-7.49 (m, 4H), 7.90 (dd, *J*<sub>1</sub> = 3.2, *J*<sub>2</sub> = 6.8, 2H). <sup>13</sup>C NMR (100 MHz; CDCl<sub>3</sub>): δ = 21.2, 111.2, 18.4, 121.7, 127.3, 129.5, 132.2, 144.7, 146.2, 151.1, 169.2. HRMS (ESI-TOF) Calcd for C<sub>16</sub>H<sub>14</sub>N<sub>3</sub>O<sub>2</sub>, [M+H]<sup>+</sup> 280.1086; Found 280.1092.

#### **2-(cyclopent-1-en-1-yl)-2*H*-benzo[*d*][1,2,3]triazole (4s).**

cyclopentene **1s** (0.5 mmol, 34.0 mg), benzotriazole **2a** (0.5 mmol, 59.6 mg), (PhSe)<sub>2</sub> (5% mol, 7.8 mg), Me<sub>3</sub>SiH (0.5 mmol, 37.1 mg) and K<sub>2</sub>S<sub>2</sub>O<sub>8</sub> (0.6 mmol, 162.0 mg). Then the reaction mixture was stirred in dioxane (2.0 mL) at 120 °C. Upon completion of the reaction (as monitored by TLC), the mixture was cooled to room temperature and quenched with water before being extracted with dichloromethane (5 × 3 mL). The combined organic layers were dried over anhydrous Na<sub>2</sub>SO<sub>4</sub> and concentrated under reduced pressure to give a residue, which was purified by flash

column chromatography to give the desired product **4s** as white solid (78%, 72.2 mg), melting point: 91-92 °C.

<sup>1</sup>H NMR (400 MHz; CDCl<sub>3</sub>): δ = 2.16-2.23 (m, 2H), 2.65-2.69 (m, 2H), 3.16-3.20 (m, 2H), 6.63 (s, 1H), 7.37 (dd, *J*<sub>1</sub> = 3.2, *J*<sub>2</sub> = 6.8, 2H), 7.86 (dd, *J*<sub>1</sub> = 2.8, *J*<sub>2</sub> = 6.4, 2H). <sup>13</sup>C NMR (100 MHz; CDCl<sub>3</sub>): δ = 22.1, 31.2, 31.4, 118.0, 121.2, 126.9, 141.8, 144.5. HRMS (ESI-TOF) Calcd for C<sub>11</sub>H<sub>12</sub>N<sub>3</sub>, [M+H]<sup>+</sup> 186.1031; Found 186.1037.

**2-(cyclohex-1-en-1-yl)-2H-benzo[d][1,2,3]triazole (4t).**

cyclohexene **1t** (0.5 mmol, 41.0 mg), benzotriazole **2a** (0.5 mmol, 59.6 mg), (PhSe)<sub>2</sub> (5% mol, 7.8 mg), Me<sub>3</sub>SiH (0.5 mmol, 37.1 mg) and K<sub>2</sub>S<sub>2</sub>O<sub>8</sub> (0.6 mmol, 162.0 mg). Then the reaction mixture was stirred in dioxane (2.0 mL) at 120 °C. Upon completion of the reaction (as monitored by TLC), the mixture was cooled to room temperature and quenched with water before being extracted with dichloromethane (5 × 3 mL). The combined organic layers were dried over anhydrous Na<sub>2</sub>SO<sub>4</sub> and concentrated under reduced pressure to give a residue, which was purified by flash column chromatography to give the desired product **4t** as white solid (73%, 72.7 mg), melting point: 65-66 °C.

<sup>1</sup>H NMR (400 MHz; CDCl<sub>3</sub>): δ = 1.72-1.76 (m, 2H), 1.90-1.93 (m, 2H), 2.35-2.37 (m, 2H), 2.90-2.92 (m, 2H), 6.98 (s, 1H), 7.35 (dd, *J*<sub>1</sub> = 2.8, *J*<sub>2</sub> = 6.4, 2H), 7.86 (dd, *J*<sub>1</sub> = 3.2, *J*<sub>2</sub> = 6.4, 2H). <sup>13</sup>C NMR (100 MHz; CDCl<sub>3</sub>): δ = 21.6, 22.3, 24.4, 25.6, 118.0, 120.7, 126.5, 138.2, 144.1. HRMS (ESI-TOF) Calcd for C<sub>12</sub>H<sub>14</sub>N<sub>3</sub>, [M+H]<sup>+</sup> 200.1188; Found 200.1195.

**(E)-2-(cyclooct-1-en-1-yl)-2H-benzo[d][1,2,3]triazole (4u).**

(*Z*)-cyclooctene **1u** (0.5 mmol, 55.1 mg), benzotriazole **2a** (0.5 mmol, 59.6 mg), (PhSe)<sub>2</sub> (5% mol, 7.8 mg), Me<sub>3</sub>SiH (0.5 mmol, 37.1 mg) and K<sub>2</sub>S<sub>2</sub>O<sub>8</sub> (0.6 mmol, 162.0 mg). Then the reaction mixture was stirred in dioxane (2.0 mL) at 120 °C. Upon completion of the reaction (as monitored by TLC), the mixture was cooled to room temperature and quenched with water before being extracted with dichloromethane (5 × 3 mL). The combined organic layers were dried over anhydrous Na<sub>2</sub>SO<sub>4</sub> and

concentrated under reduced pressure to give a residue, which was purified by flash column chromatography to give the desired product **4u** as white solid (82%, 93.2 mg), melting point: 64-65 °C.

<sup>1</sup>H NMR (400 MHz; CDCl<sub>3</sub>):  $\delta$  = 1.59-1.84 (m, 8H), 2.38-2.43 (m, 2H), 3.11-3.14 (m, 2H), 6.96 (s, 1H), 7.35 (dd,  $J_1$  = 2.8,  $J_2$  = 6.4, 2H), 7.86 (dd,  $J_1$  = 3.2,  $J_2$  = 6.4, 2H). <sup>13</sup>C NMR (100 MHz; CDCl<sub>3</sub>):  $\delta$  = 25.9, 26.3, 26.4, 26.7, 28.5, 29.9, 118.0, 123.1, 126.5, 140.5, 144.2. HRMS (ESI-TOF) Calcd for C<sub>14</sub>H<sub>18</sub>N<sub>3</sub>, [M+H]<sup>+</sup> 228.1501; Found 228.1509.

**2-(2,5-dihydrofuran-3-yl)-2H-benzo[d][1,2,3]triazole (4v).**

2,5-dihydrofuran **1v** (0.5 mmol, 35.0 mg), benzotriazole **2a** (0.5 mmol, 59.6 mg), (PhSe)<sub>2</sub> (5% mol, 7.8 mg), Me<sub>3</sub>SiH (0.5 mmol, 37.1 mg) and K<sub>2</sub>S<sub>2</sub>O<sub>8</sub> (0.6 mmol, 162.0 mg). Then the reaction mixture was stirred in dioxane (2.0 mL) at 120 °C. Upon completion of the reaction (as monitored by TLC), the mixture was cooled to room temperature and quenched with water before being extracted with dichloromethane (5 × 3 mL). The combined organic layers were dried over anhydrous Na<sub>2</sub>SO<sub>4</sub> and concentrated under reduced pressure to give a residue, which was purified by flash column chromatography to give the desired product **4v** as white solid (69%, 64.6 mg), melting point: 116-117 °C.

<sup>1</sup>H NMR (400 MHz; CDCl<sub>3</sub>):  $\delta$  = 4.99-5.02 (m, 2H), 5.30-5.33 (m, 2H), 6.69 (t,  $J$  = 2.0, 1H), 7.42 (dd,  $J_1$  = 3.2,  $J_2$  = 7.2, 2H), 7.86 (d,  $J$  = 2.8, 2H). <sup>13</sup>C NMR (100 MHz; CDCl<sub>3</sub>):  $\delta$  = 72.2, 75.5, 115.2, 118.1, 127.6, 144.7. HRMS (ESI-TOF) Calcd for C<sub>10</sub>H<sub>10</sub>ON<sub>3</sub>, [M+H]<sup>+</sup> 188.0824; Found 188.0827.

**5-methyl-2-(1-phenylvinyl)-2H-benzo[d][1,2,3]triazole (4w).**

styrene **1a** (0.5 mmol, 54.0 mg), 5-methyl-2H-benzo[d][1,2,3]triazole (0.5 mmol, 66.5 mg), (PhSe)<sub>2</sub> (5% mol, 7.8 mg), Me<sub>3</sub>SiH (0.5 mmol, 37.1 mg) and K<sub>2</sub>S<sub>2</sub>O<sub>8</sub> (0.6 mmol, 162.0 mg). Then the reaction mixture was stirred in dioxane (2.0 mL) at 120 °C. Upon completion of the reaction (as monitored by TLC), the mixture was cooled to room temperature and quenched with water before being extracted with dichloromethane (5



× 3 mL). The combined organic layers were dried over anhydrous Na<sub>2</sub>SO<sub>4</sub> and concentrated under reduced pressure to give a residue, which was purified by flash column chromatography to give the desired product **4w** as pale yellow liquid (70%, 82.4 mg).

<sup>1</sup>H NMR (400 MHz; CDCl<sub>3</sub>): δ = 2.51 (s, 3H), 5.64 (d, *J* = 0.8, 1H), 6.18 (d, *J* = 0.8, 1H), 7.25 (d, *J* = 1.2, 1H), 7.44-7.46 (m, 5H), 7.66 (d, *J* = 1.2, 1H), 7.79 (d, *J* = 8.8, 1H). <sup>13</sup>C NMR (100 MHz; CDCl<sub>3</sub>): δ = 22.2, 110.5, 116.5, 117.9, 128.2, 128.4, 129.5, 130.2, 134.7, 143.4, 145.2, 147.1. HRMS (ESI-TOF) Calcd for C<sub>15</sub>H<sub>14</sub>N<sub>3</sub>, [M+H]<sup>+</sup> 236.1188; Found 236.1194.

#### **5-chloro-2-(1-phenylvinyl)-2H-benzo[*d*][1,2,3]triazole (4x).**

styrene **1a** (0.5 mmol, 54.0 mg), 5-chloro-2H-benzo[*d*][1,2,3]triazole (0.5 mmol, 76.7 mg), (PhSe)<sub>2</sub> (5% mol, 7.8 mg), Me<sub>3</sub>SiH (0.5 mmol, 37.1 mg) and K<sub>2</sub>S<sub>2</sub>O<sub>8</sub> (0.6 mmol, 162.0 mg). Then the reaction mixture was stirred in dioxane (2.0 mL) at 120 °C. Upon completion of the reaction (as monitored by TLC), the mixture was cooled to room temperature and quenched with water before being extracted with dichloromethane (5 × 3 mL). The combined organic layers were dried over anhydrous Na<sub>2</sub>SO<sub>4</sub> and concentrated under reduced pressure to give a residue, which was purified by flash column chromatography to give the desired product **4x** as white solid (74%, 94.6 mg), melting point: 65-66 °C.

<sup>1</sup>H NMR (400 MHz; CDCl<sub>3</sub>): δ = 5.68 (s, 1H), 6.24 (s, 1H), 7.35-7.46 (m, 6H), 7.84-7.92 (m, 2H). <sup>13</sup>C NMR (100 MHz; CDCl<sub>3</sub>): δ = 111.4, 117.4, 119.7, 128.3, 128.5, 128.8, 129.6, 133.1, 134.3, 143.2, 145.0, 147.0. HRMS (ESI-TOF) Calcd for C<sub>14</sub>H<sub>11</sub>ClN<sub>3</sub>, [M+H]<sup>+</sup> 256.0642; Found 256.0647.

#### **5,6-dimethyl-2-(1-phenylvinyl)-2H-benzo[*d*][1,2,3]triazole (4y).**

styrene **1a** (0.5 mmol, 54.0 mg), 5,6-dimethyl-2H-benzo[*d*][1,2,3]triazole (0.5 mmol, 73.6 mg), (PhSe)<sub>2</sub> (5% mol, 7.8 mg), Me<sub>3</sub>SiH (0.5 mmol, 37.1 mg) and K<sub>2</sub>S<sub>2</sub>O<sub>8</sub> (0.6 mmol, 162.0 mg). Then the reaction mixture was stirred in dioxane (2.0 mL) at 120 °C. Upon completion of the reaction (as monitored by TLC), the mixture was cooled

to room temperature and quenched with water before being extracted with dichloromethane (5 × 3 mL). The combined organic layers were dried over anhydrous Na<sub>2</sub>SO<sub>4</sub> and concentrated under reduced pressure to give a residue, which was purified by flash column chromatography to give the desired product **4y** as pale yellow liquid (75%, 93.5 mg).

<sup>1</sup>H NMR (400 MHz; CDCl<sub>3</sub>): δ = 2.42 (s, 6H), 5.61 (s, 1H), 6.16 (s, 1H), 7.44-7.45 (m, 5H), 7.65 (s, 2H). <sup>13</sup>C NMR (100 MHz; CDCl<sub>3</sub>): δ = 20.9, 110.2, 116.7, 128.2, 128.4, 129.4, 134.8, 137.9, 144.2, 147.1. HRMS (ESI-TOF) Calcd for C<sub>16</sub>H<sub>16</sub>N<sub>3</sub>, [M+H]<sup>+</sup> 250.1344; Found 250.1339.

### References:

1. E. Tang, W.-L. Wang, Y.-J. Zhao, M. Zhang, X. Dai, *Org. Lett.*, 2016, **18**, 176.
2. K. Sun, X. Wang, Y.-H. Lv, G. Li, H.-Z. Jiao, C.-W. Dai, Y.-Y. Li, C. Zhang, L. Liu, *Chem. Commun.*, 2016, **52**, 8471.
3. L. Sun, Y. Yuan, M. Yao, H. Wang, D.-X. Wang, M. Gao, Y.-H. Chen, A.-W. Lei, *Org. Lett.*, 2019, **21**, 1297.
4. 1-(Trimethylsilyl)-1H-benzotriazole **8** (CAS: 43183-36-4) is purchased directly from Sigma-Aldrich or TCI.

# V. $^1\text{H}$ NMR, and $^{13}\text{C}$ NMR Spectra of Compounds **3** and **4**

## Compound **3a**

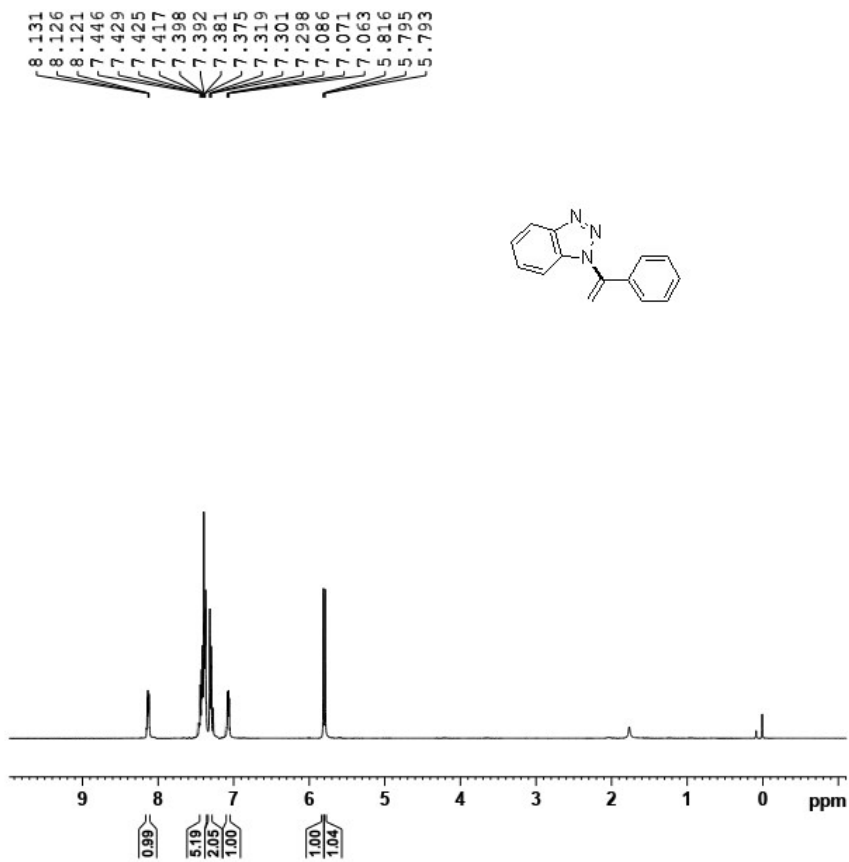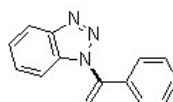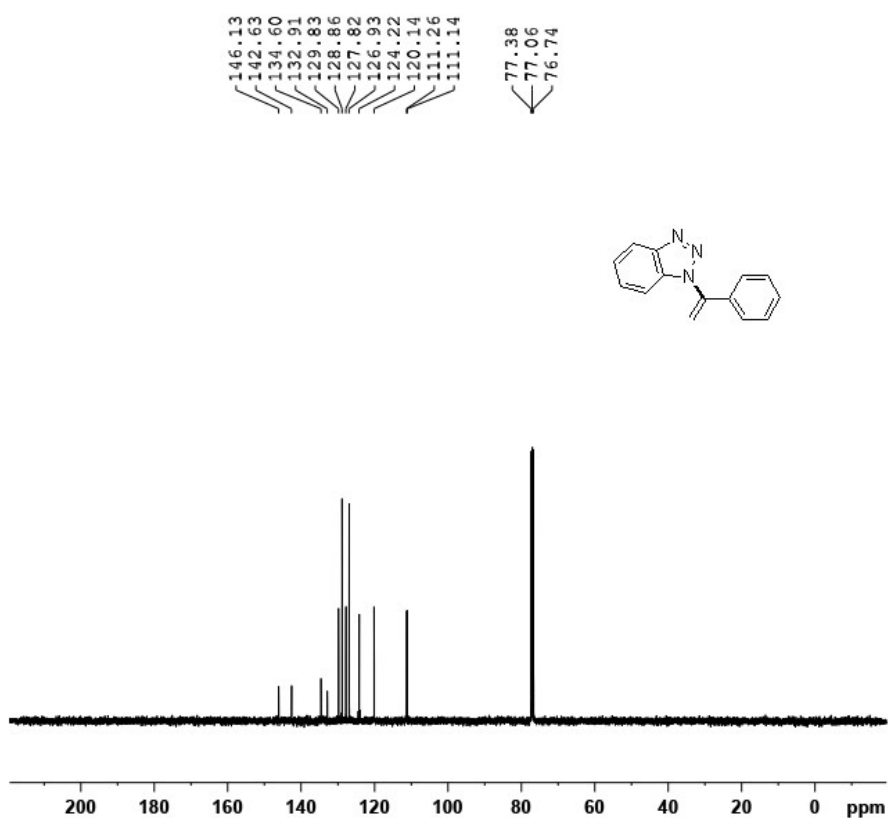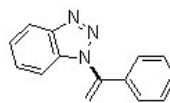

# Compound 3b

8.106  
7.434  
7.431  
7.416  
7.398  
7.381  
7.378  
7.274  
7.260  
7.256  
7.203  
7.201  
7.184  
7.162  
7.150  
7.129  
7.127  
7.123  
6.011  
5.829

— 0.101

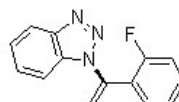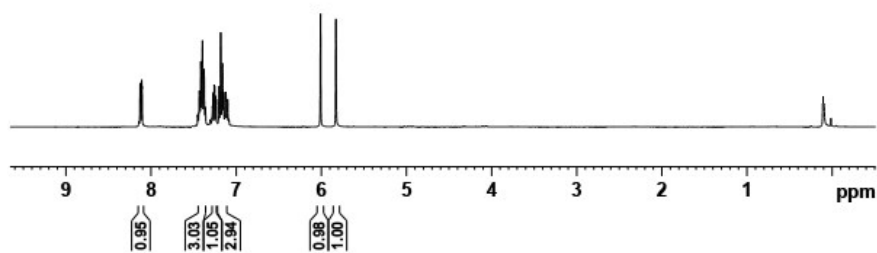

161.41  
158.90  
146.15  
137.44  
132.53  
131.44  
130.16  
127.99  
124.50  
124.22  
120.22  
116.51  
113.65  
110.66

77.37  
77.05  
76.73

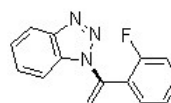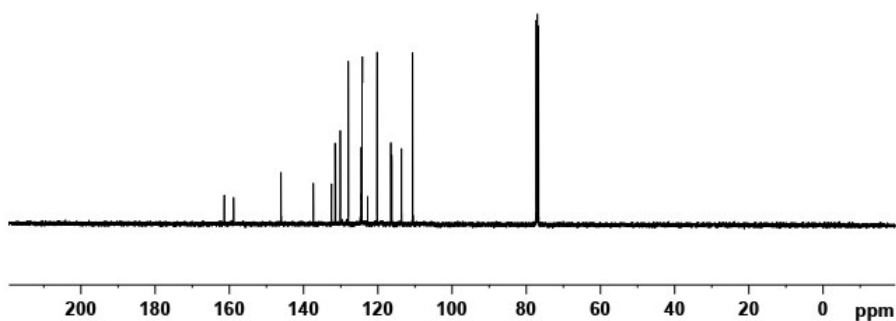

# Compound 3c

8.146  
8.129  
8.124  
7.423  
7.418  
7.409  
7.399  
7.394  
7.323  
7.310  
7.301  
7.288  
7.130  
7.113  
7.109  
7.092  
7.071  
5.767

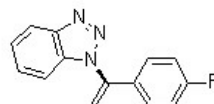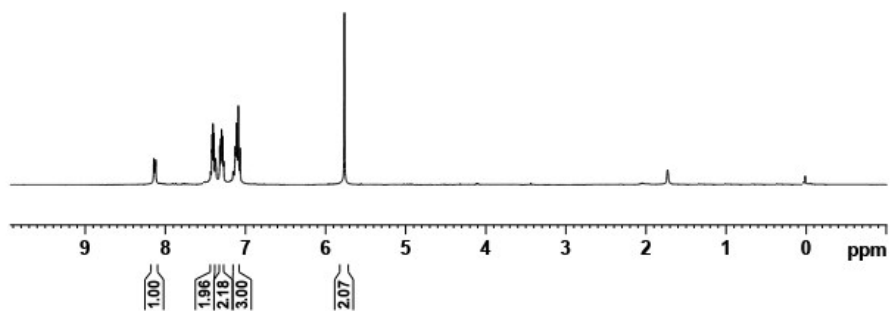

164.83  
162.35  
146.17  
141.71  
132.85  
130.87  
128.95  
128.87  
127.95  
124.30  
120.24  
116.06  
113.84  
111.05  
110.80

77.35  
77.03  
76.71

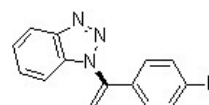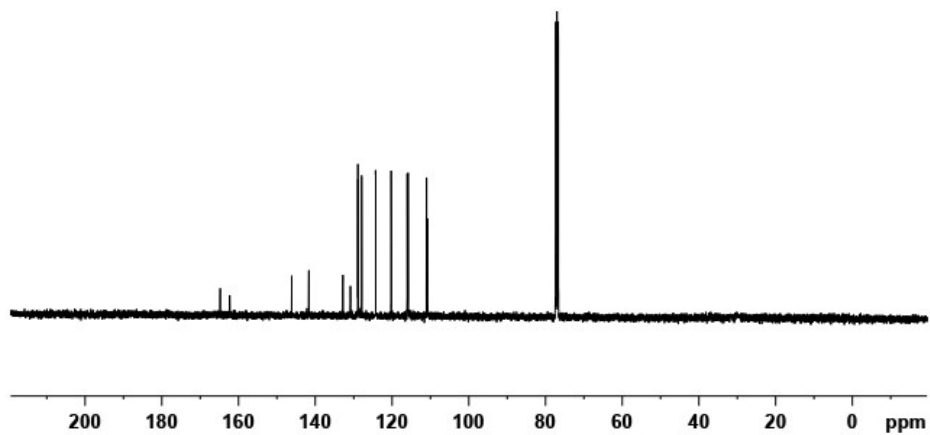

# Compound 3d

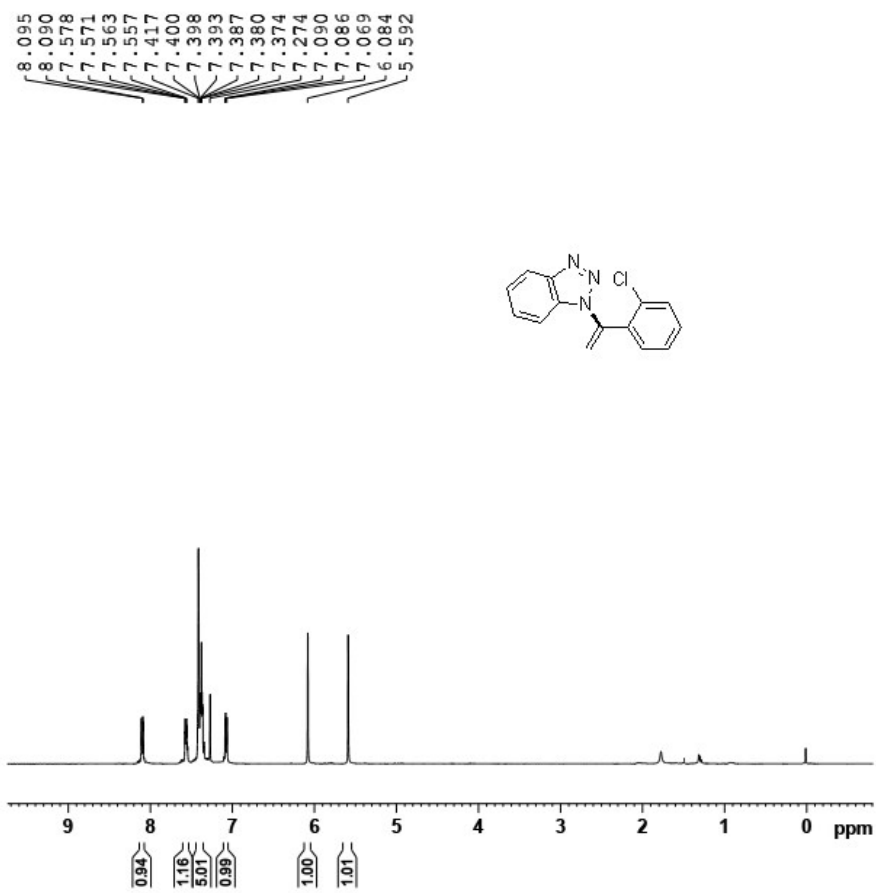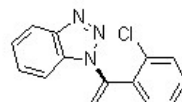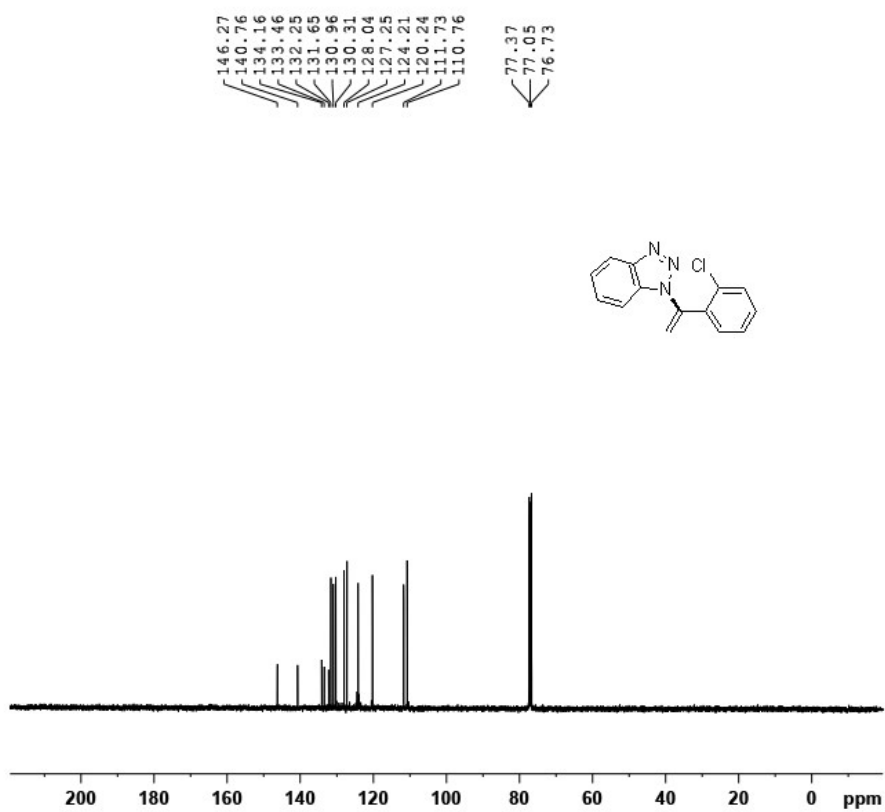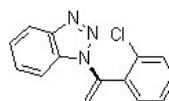

# Compound 3e

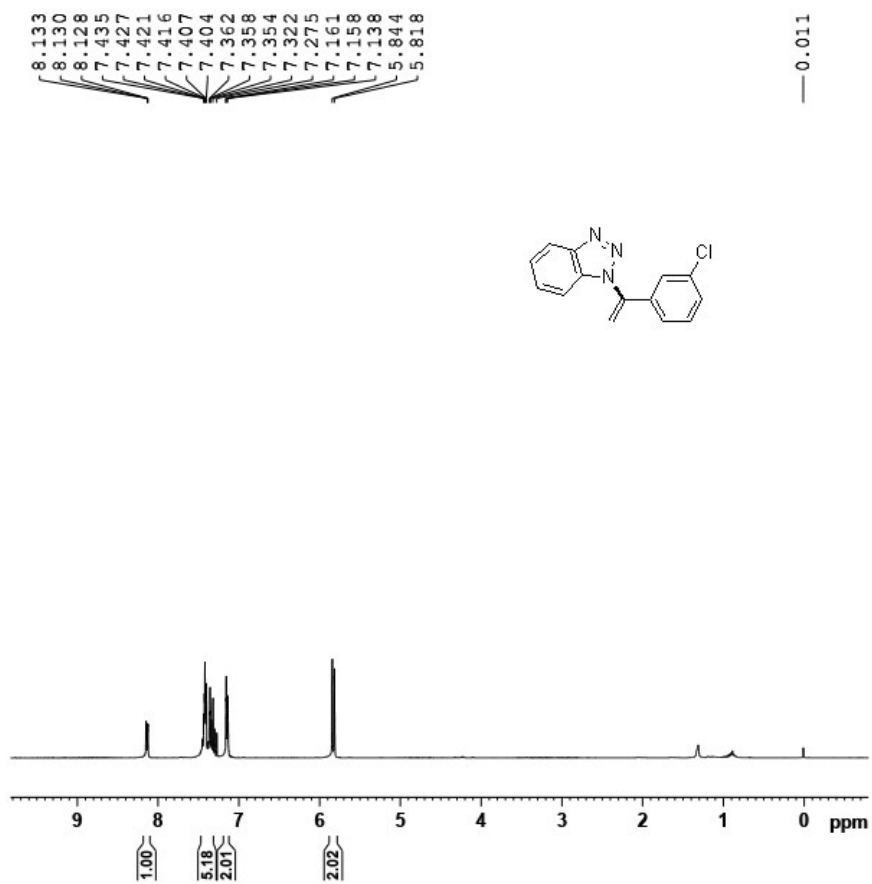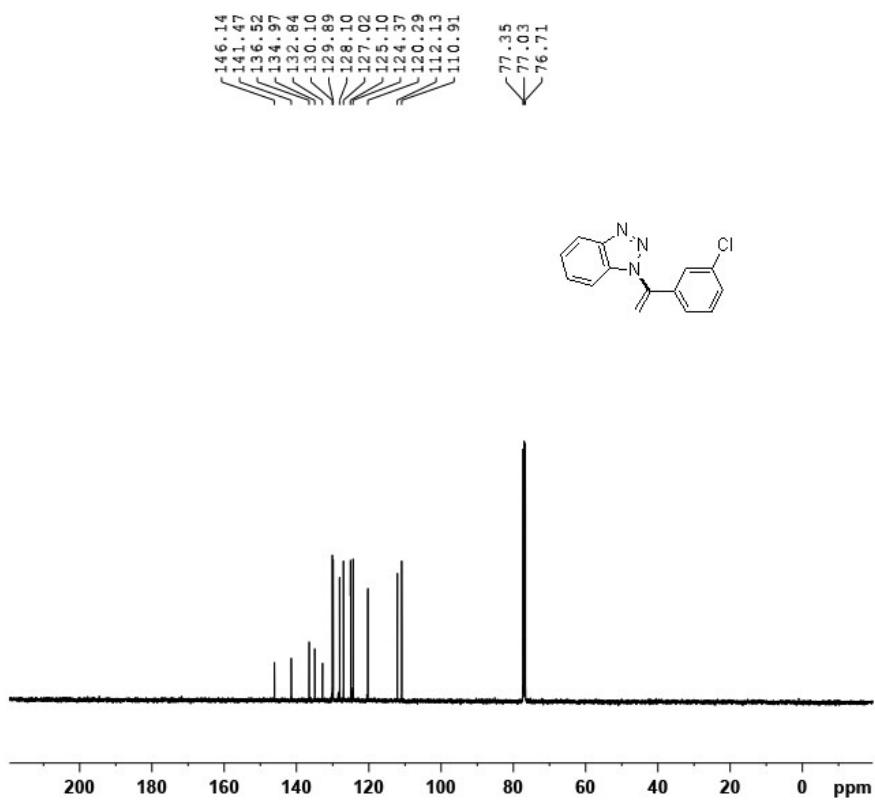

# Compound 3f

8.136  
8.131  
7.428  
7.419  
7.410  
7.404  
7.394  
7.390  
7.378  
7.373  
7.275  
7.265  
7.244  
7.136  
7.131  
7.114  
5.816  
5.805

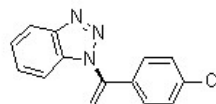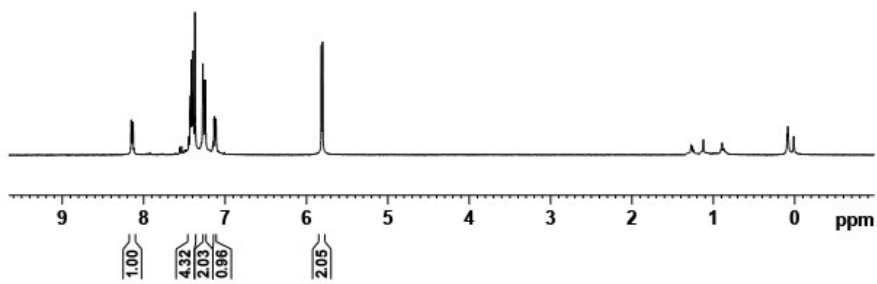

146.15  
141.64  
135.88  
133.12  
132.78  
129.14  
128.24  
128.04  
124.37  
120.29  
111.46  
111.04  
77.35  
77.03  
76.71

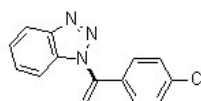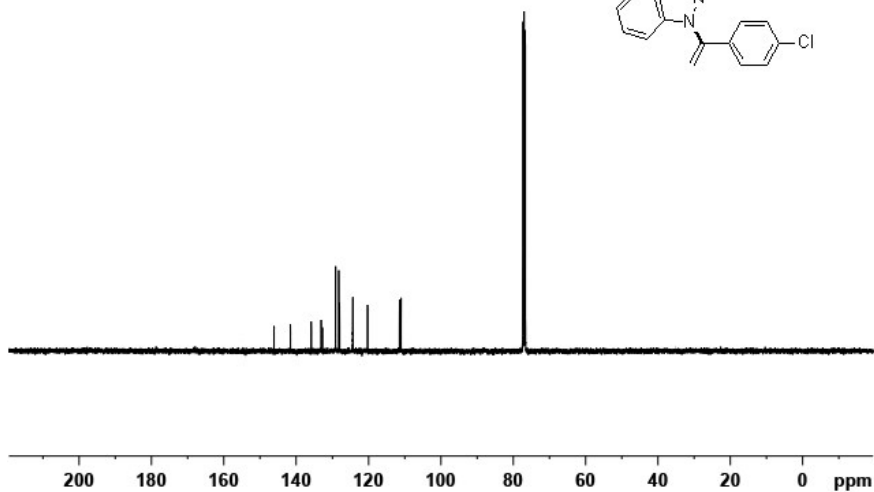



# Compound 3g

8.114  
8.107  
8.097  
8.092  
7.621  
7.619  
7.600  
7.581  
7.577  
7.479  
7.463  
7.460  
7.444  
7.389  
7.382  
7.375  
7.369  
7.365  
7.349  
7.274  
7.074  
7.070  
7.053  
6.082  
5.556  
5.554

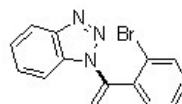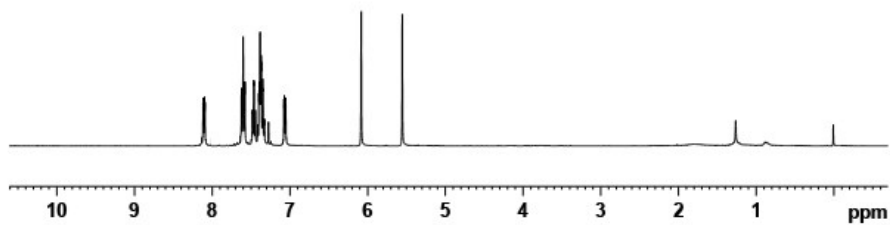

146.30  
142.04  
136.09  
133.54  
132.28  
131.98  
131.10  
128.07  
127.84  
124.23  
122.90  
120.26  
111.29  
110.88

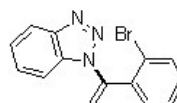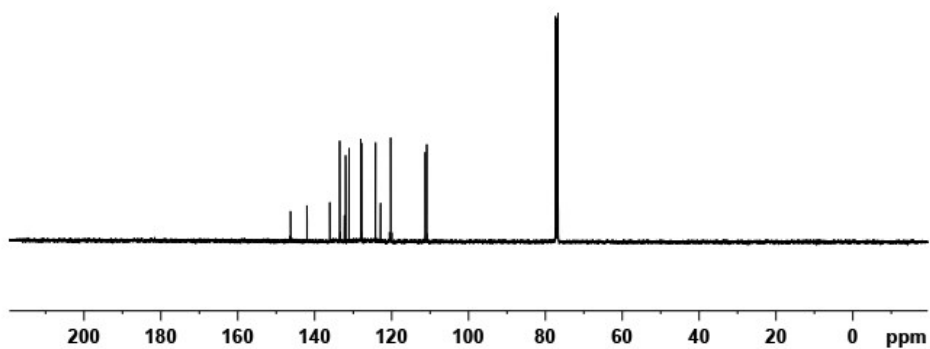

### Compound 3h

7.585  
7.565  
7.530  
7.460  
7.427  
7.396  
7.282  
7.272  
7.264  
7.244  
7.193  
7.172  
7.163  
7.143  
5.840  
5.820

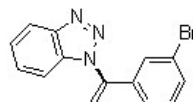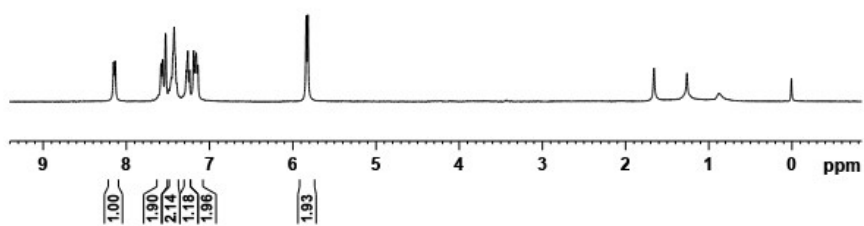

146.13  
141.33  
136.74  
132.84  
130.35  
129.91  
128.13  
125.59  
124.41  
123.01  
120.31  
112.18  
110.94

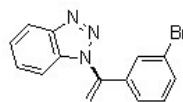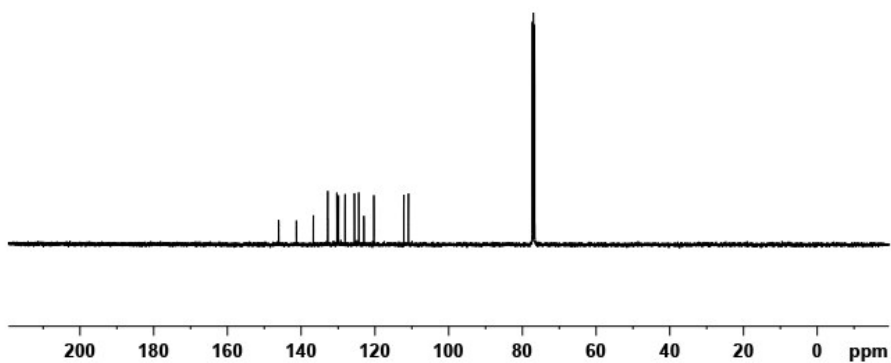

# Compound 3i

7.543  
7.531  
7.527  
7.433  
7.429  
7.425  
7.417  
7.409  
7.405  
7.274  
7.198  
7.193  
7.181  
7.177  
7.138  
7.136  
7.132  
7.123  
7.115  
5.826  
5.824  
5.808  
5.805

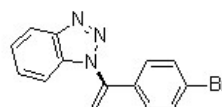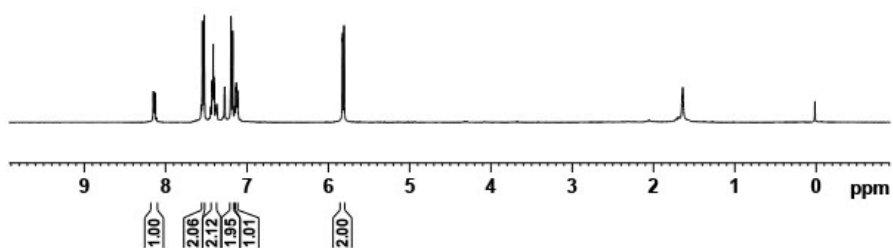

146.16  
144.76  
144.76  
133.63  
132.81  
132.08  
128.66  
128.02  
124.32  
124.12  
120.28  
111.47  
110.98  
77.32  
77.00  
76.68

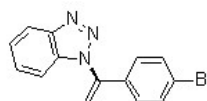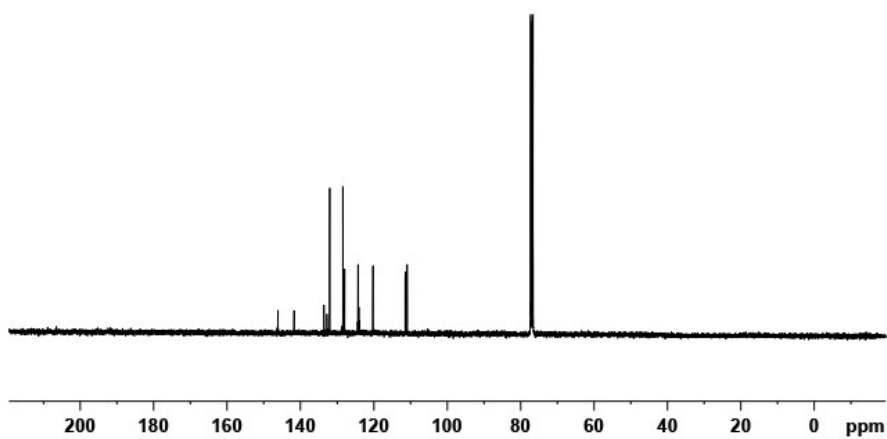

# Compound 3j

8.155  
8.137  
8.134  
7.668  
7.647  
7.445  
7.436  
7.431  
7.426  
7.155  
7.136  
5.921  
5.891

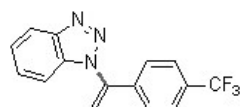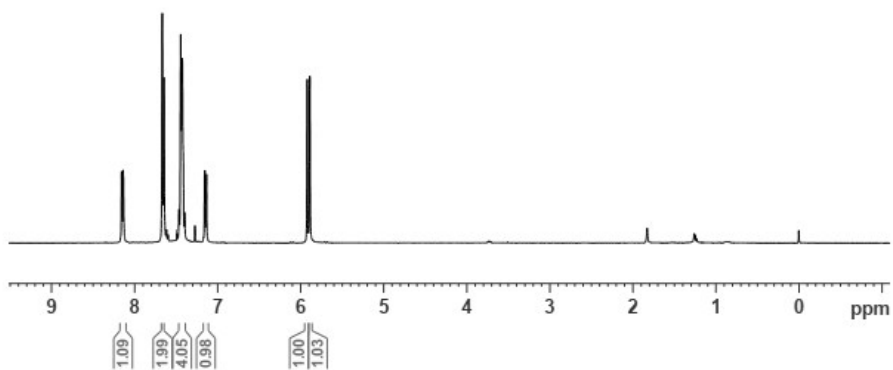

146.15  
141.47  
138.12  
132.78  
128.25  
127.30  
126.72  
125.94  
125.90  
125.86  
125.83  
124.49  
120.35  
112.92  
110.83  
77.38  
77.06  
76.74

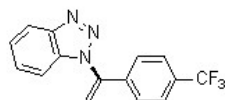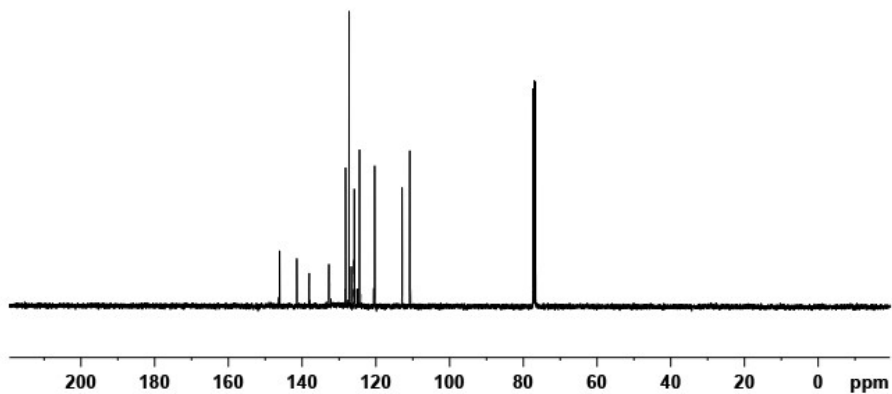

# Compound 3k

8.087  
8.085  
8.066  
8.065  
7.428  
7.425  
7.407  
7.400  
7.397  
7.387  
7.378  
7.375  
7.354  
7.352  
7.323  
7.300  
7.261  
7.240  
6.267  
5.507

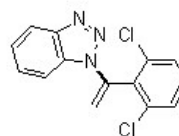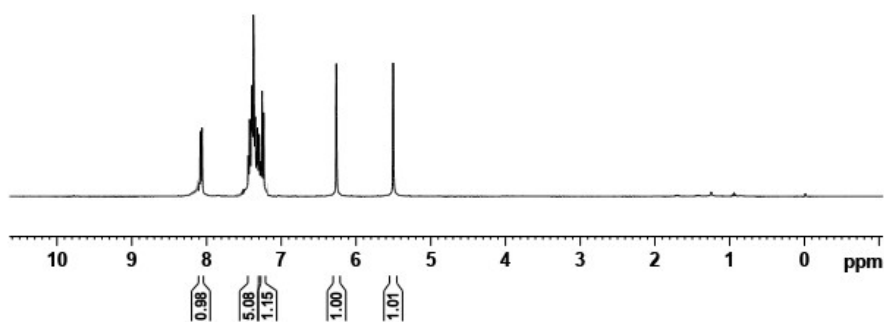

146.25  
136.96  
135.81  
133.23  
132.72  
131.70  
131.06  
128.45  
128.41  
124.37  
120.33  
111.91  
110.71  
77.51  
77.19  
76.87

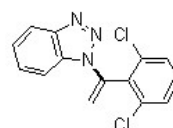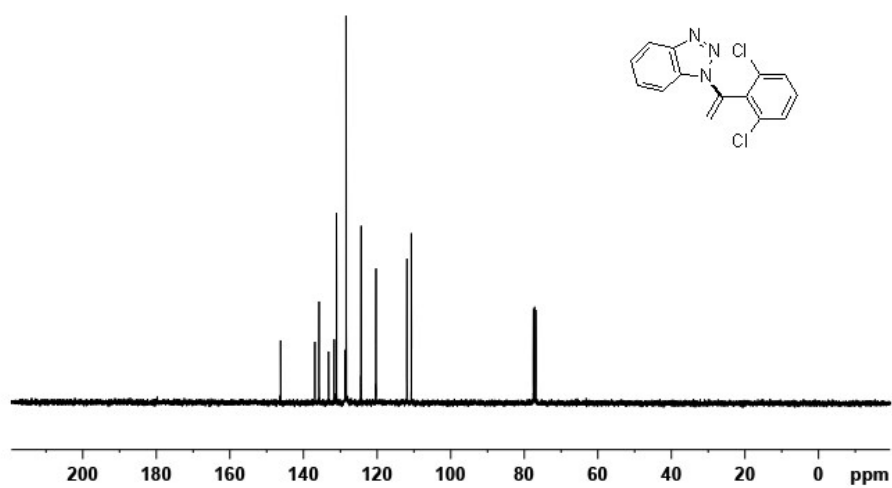

# Compound 3l

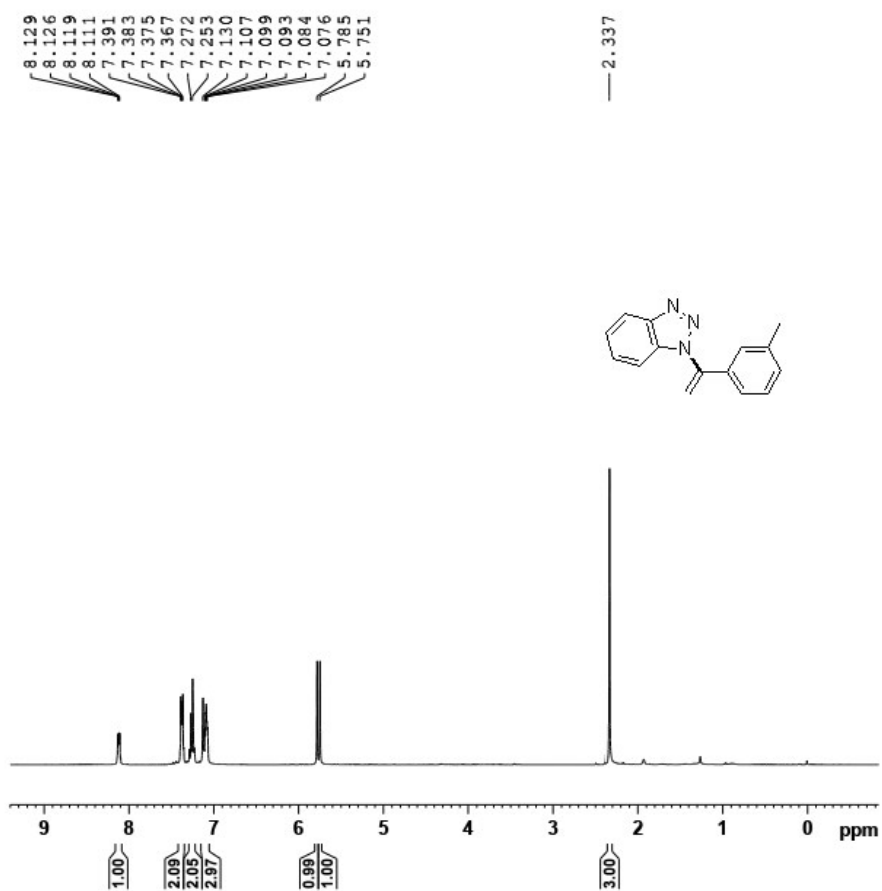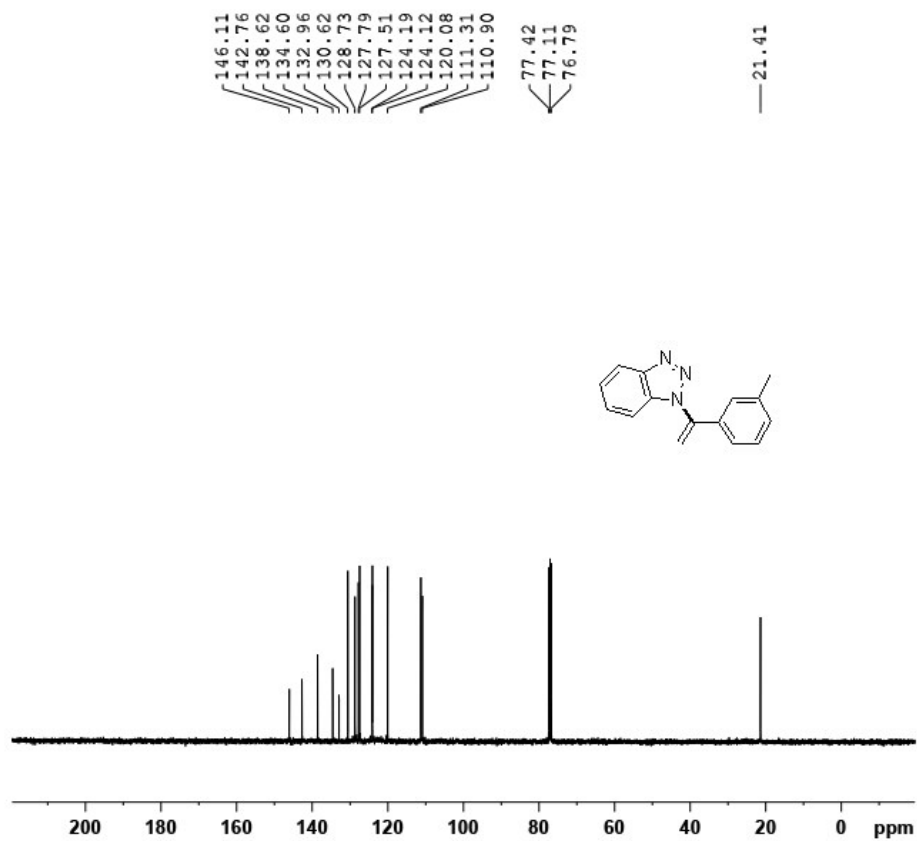

# Compound 3m

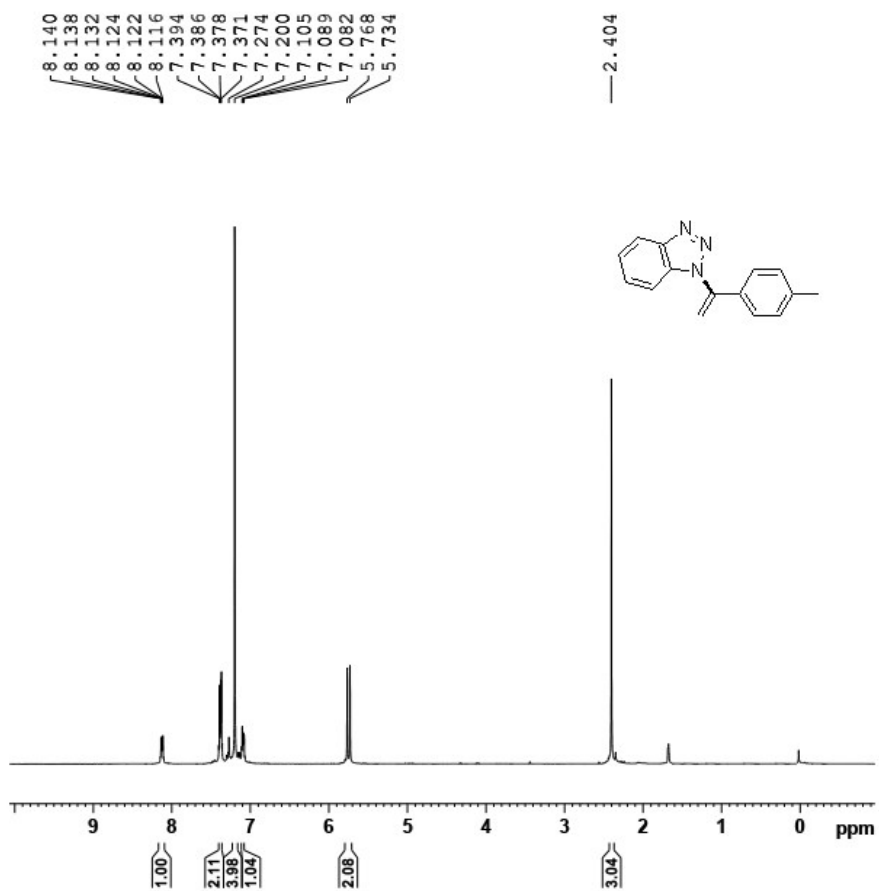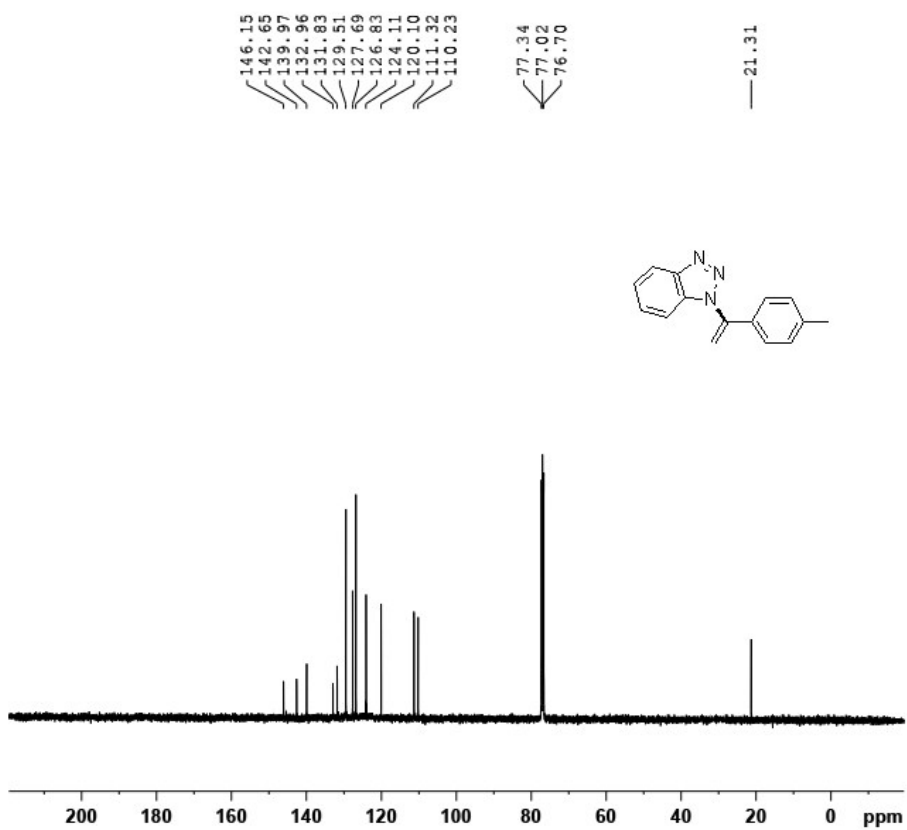

# Compound 3n

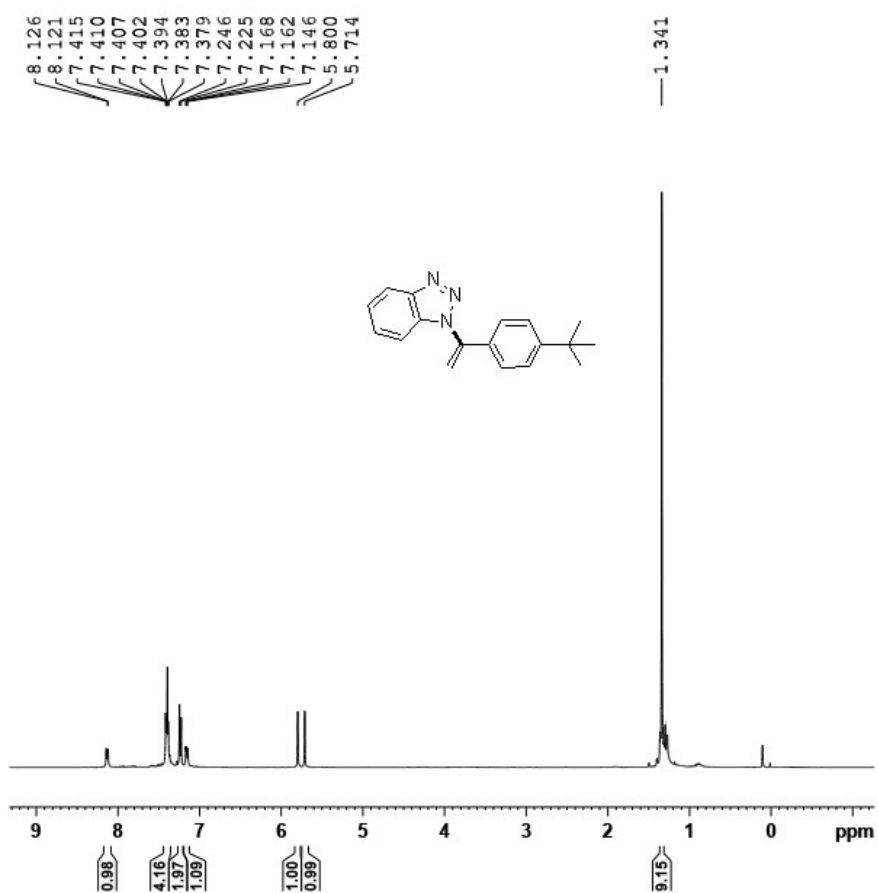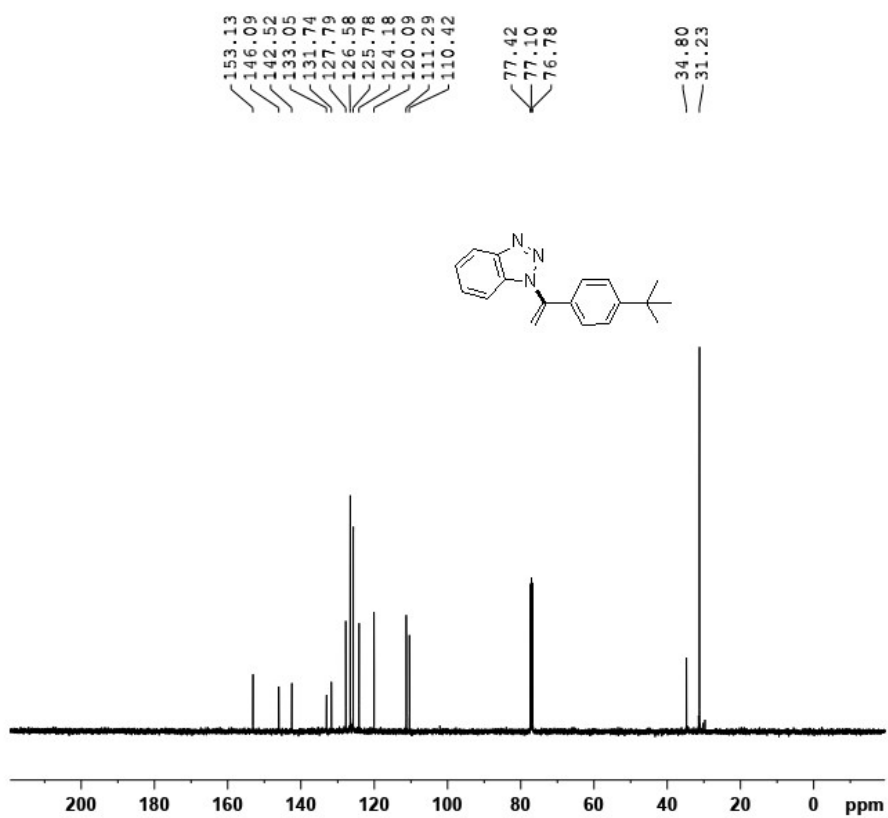



# Compound 3o

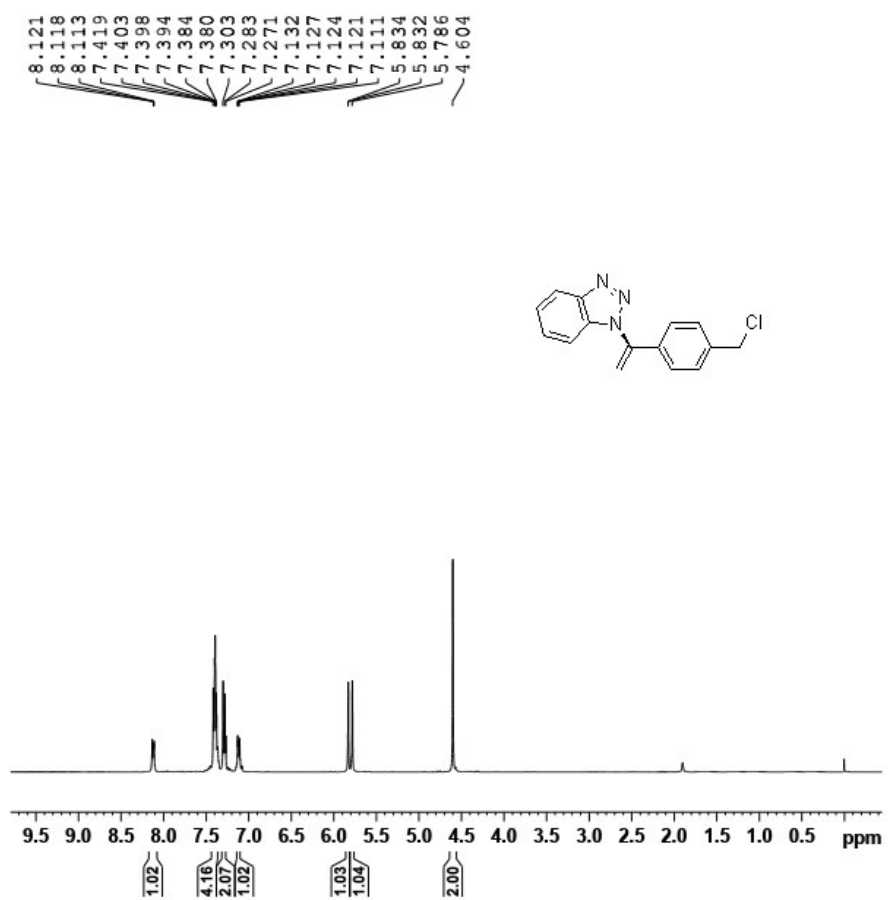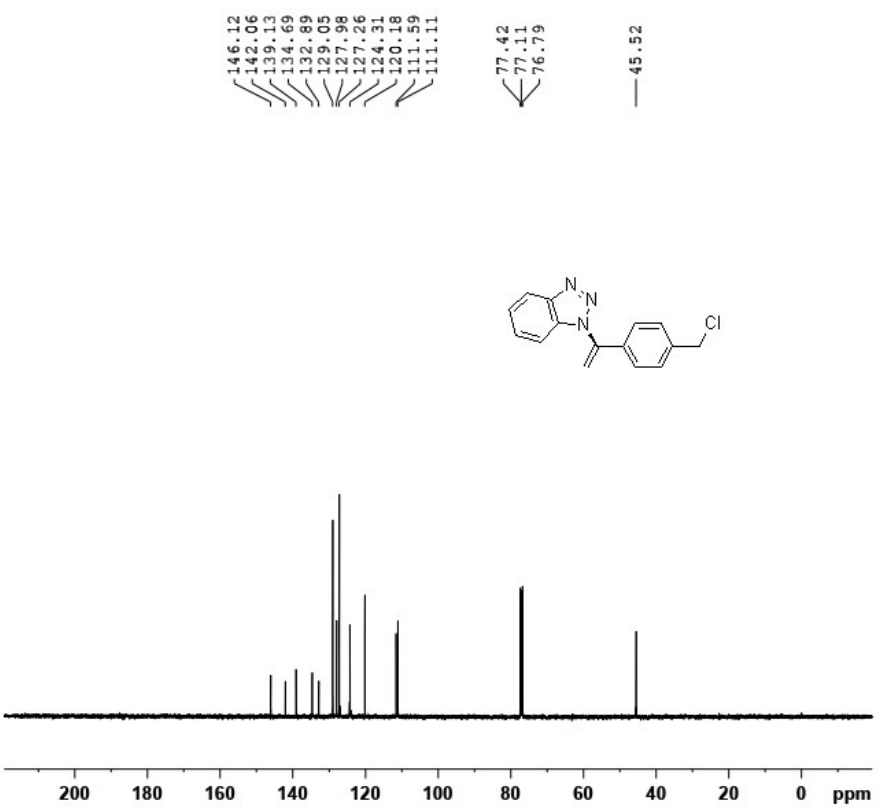

# Compound 3p

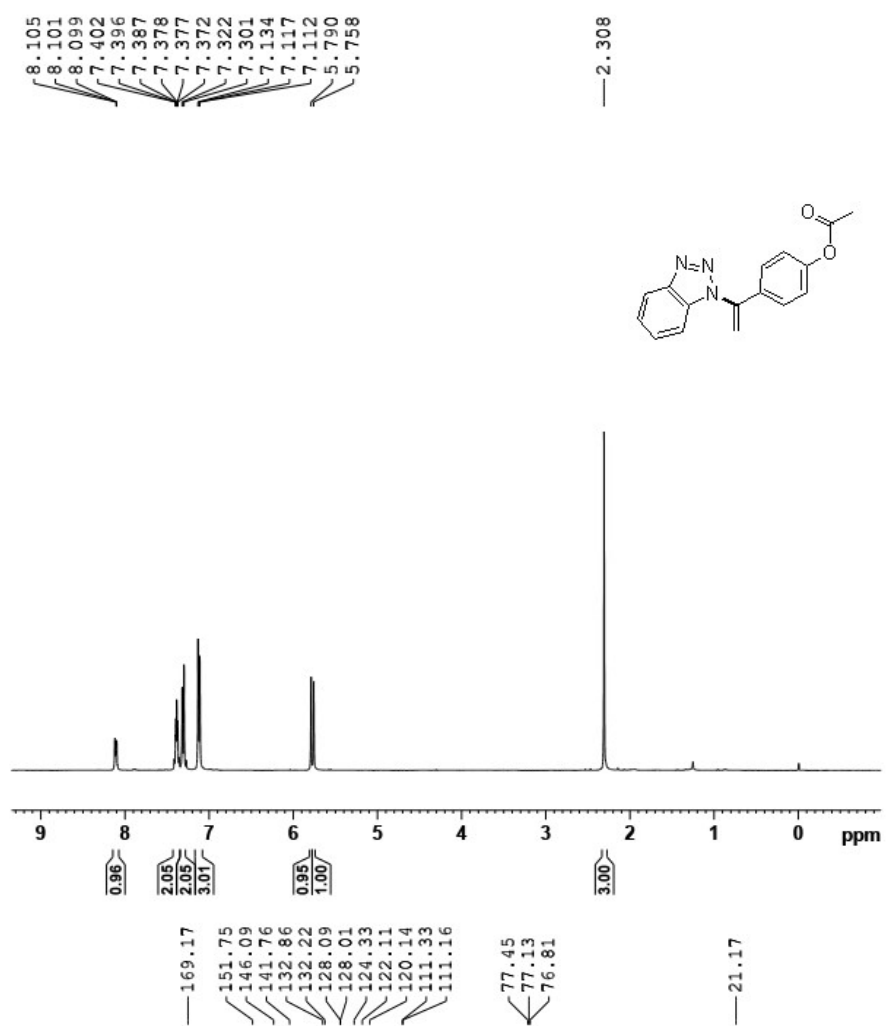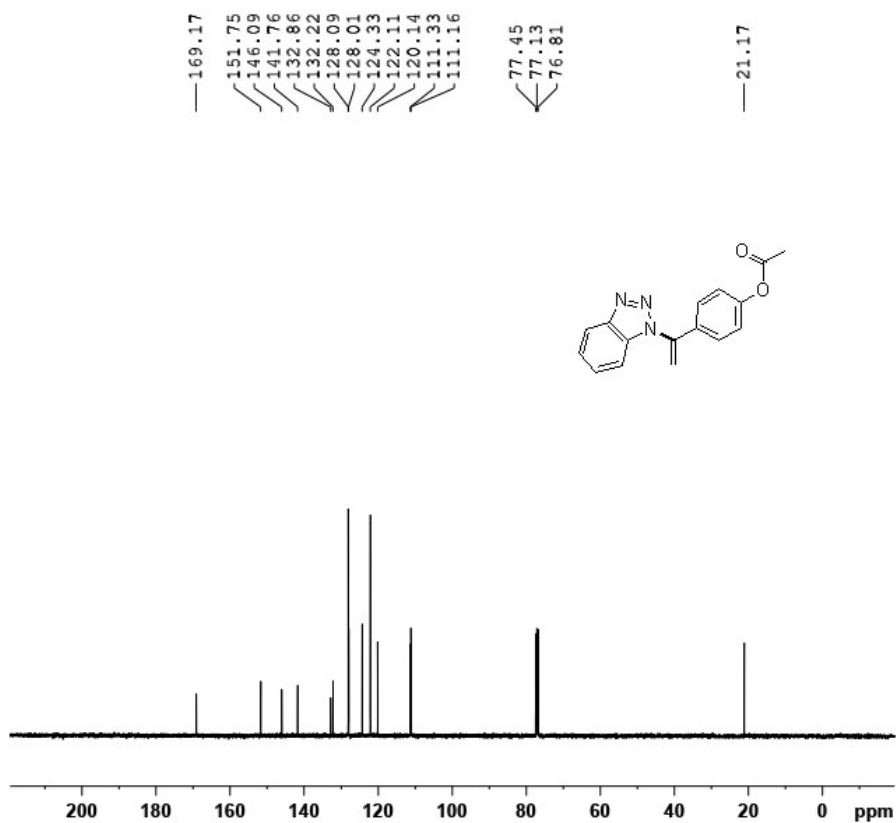

# Compound 3q

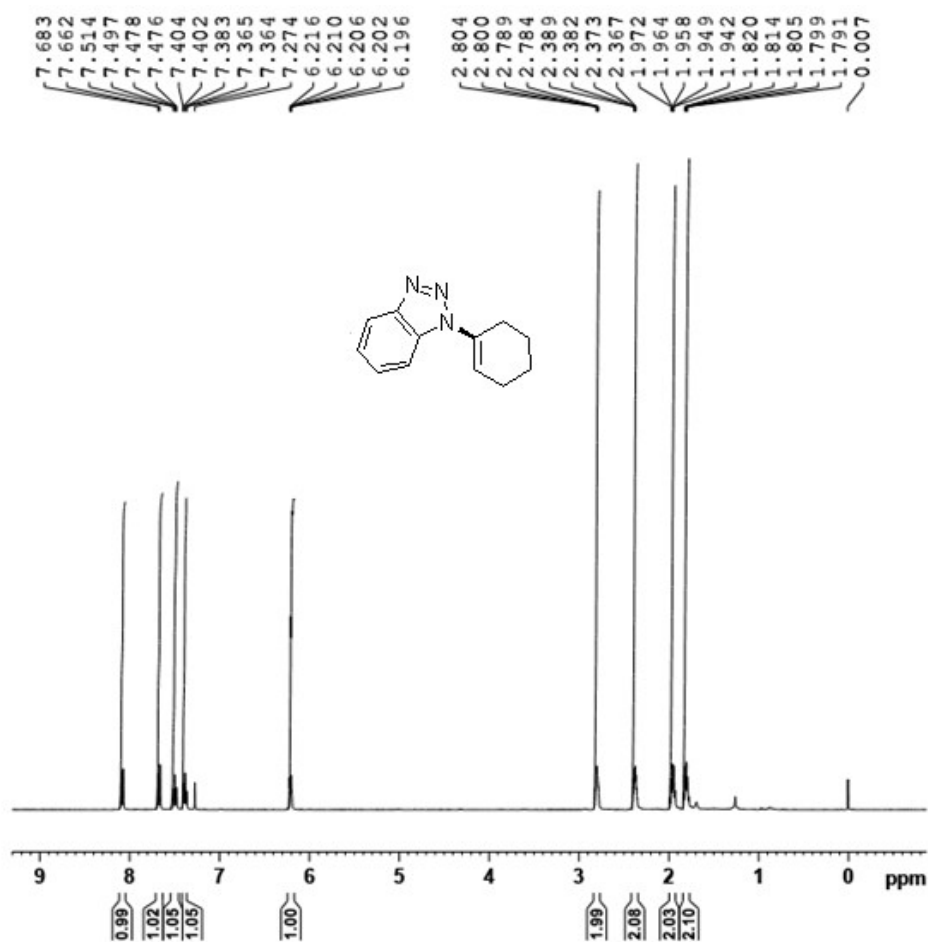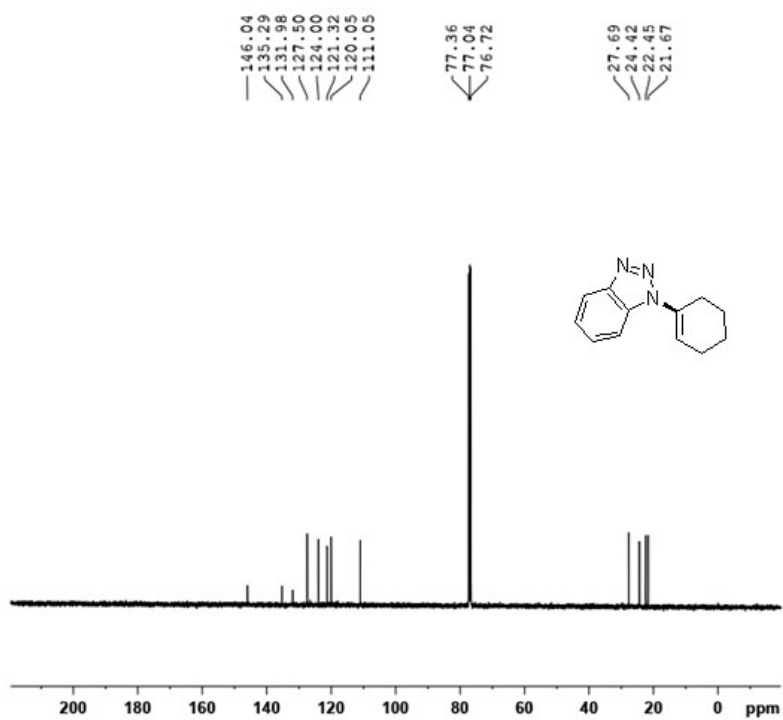

# Compound 3r

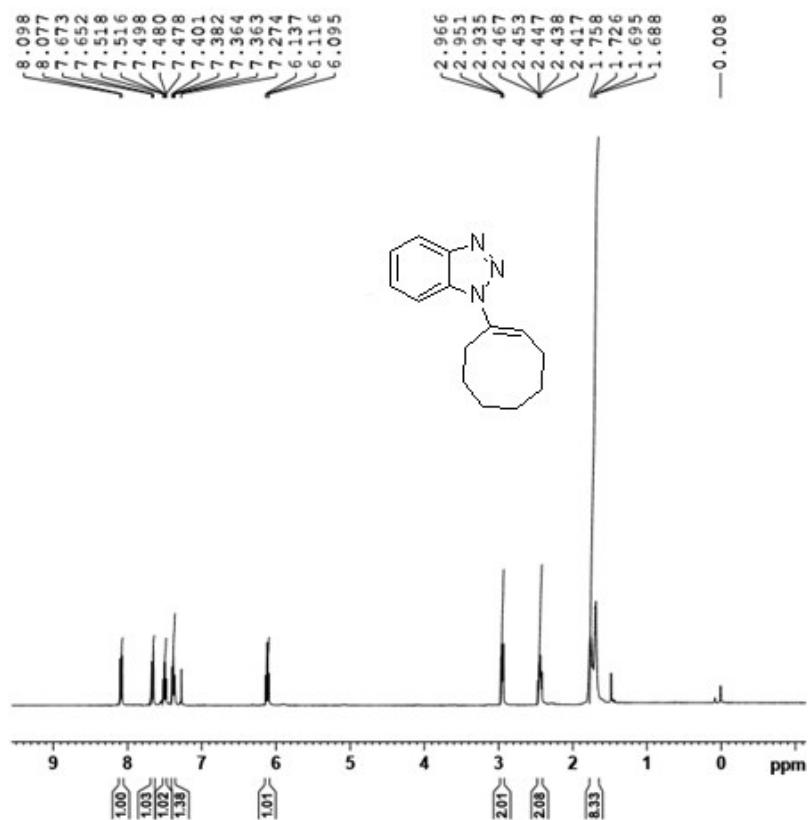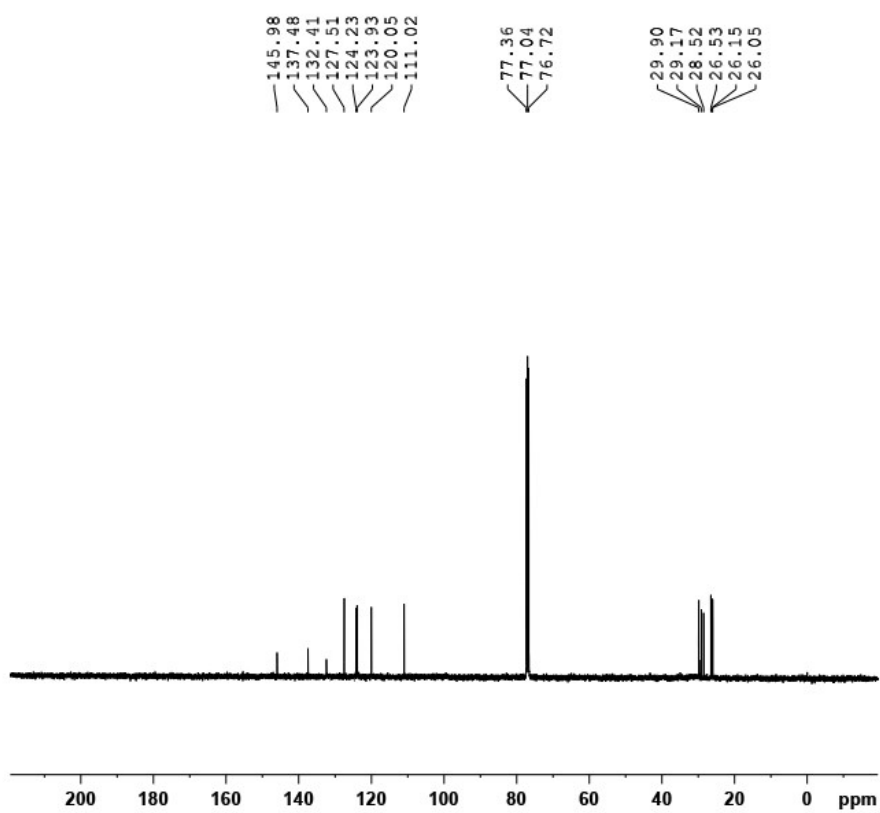

# Compound 3s

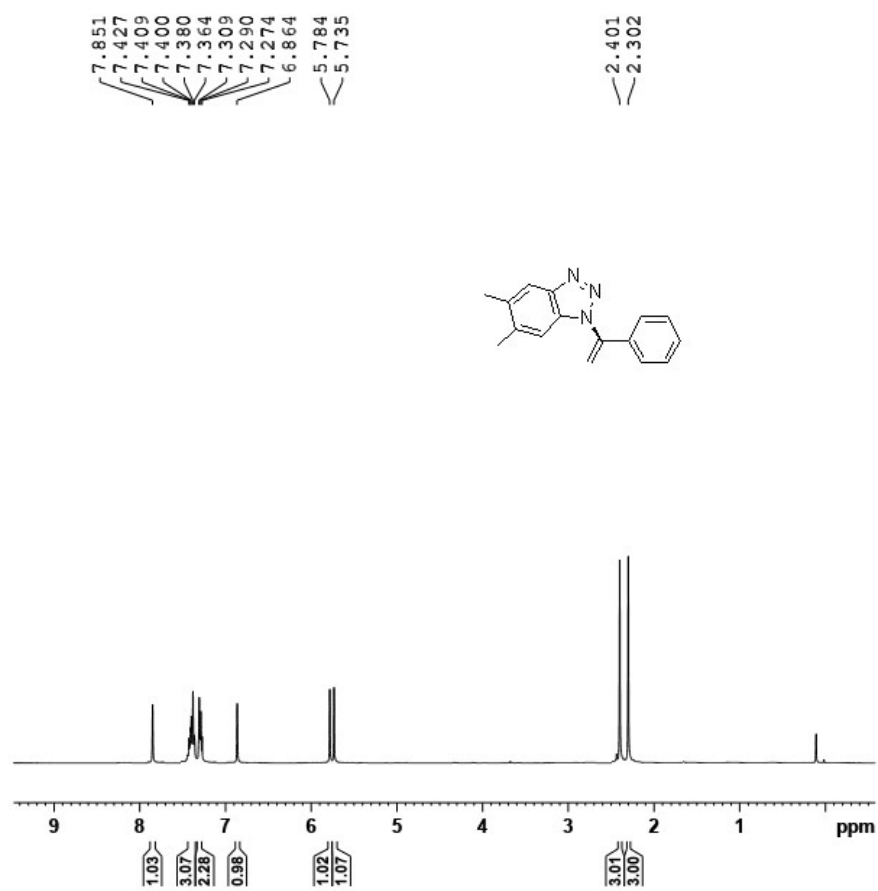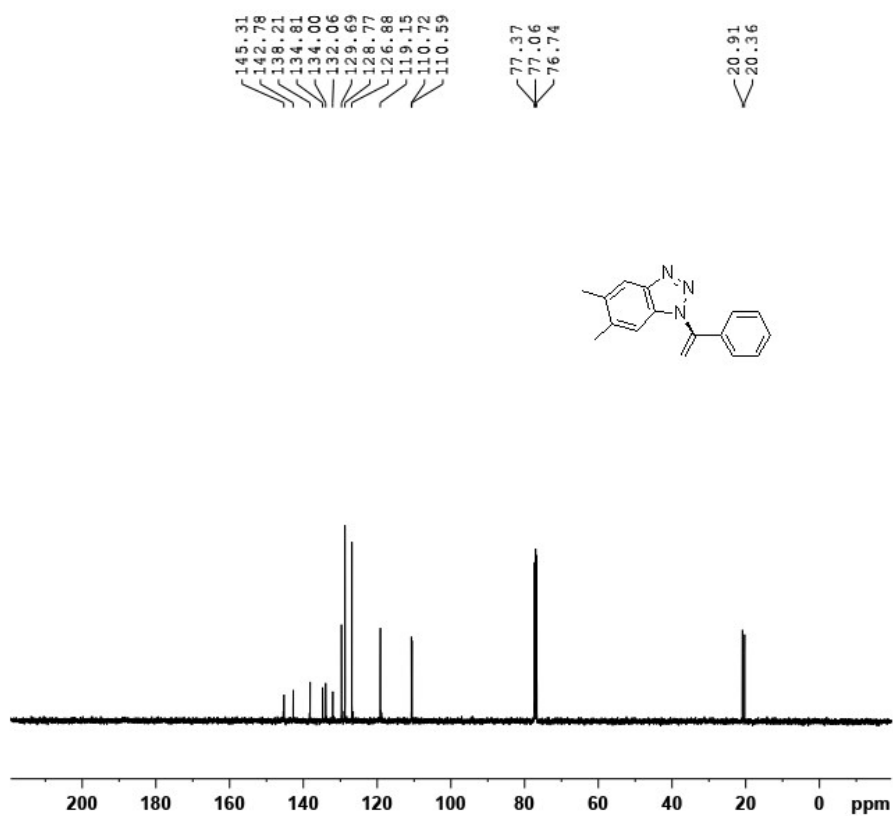

# Compound 4a

7.939  
7.932  
7.923  
7.916  
7.459  
7.447  
7.439  
7.429  
7.422  
7.271  
6.219  
— 5.678

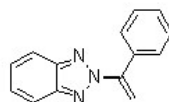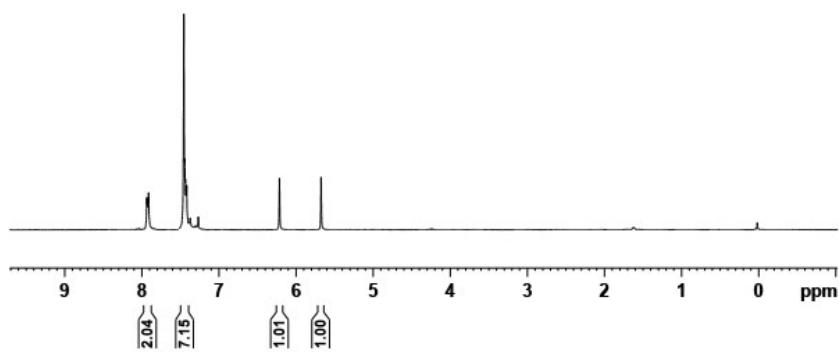

147.18  
144.72  
134.63  
129.60  
128.47  
128.28  
127.27  
118.52  
111.06

77.36  
77.04  
76.72

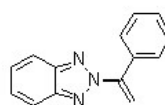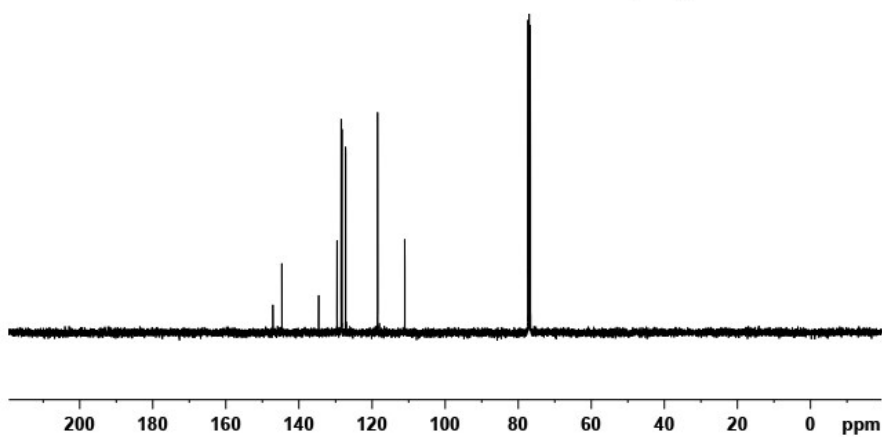

# Compound 4b

7.896  
7.888  
7.880  
7.487  
7.471  
7.453  
7.419  
7.412  
7.403  
7.395  
7.279  
7.272  
7.261  
7.190  
7.165  
7.143  
6.503  
5.632

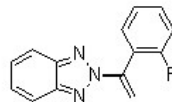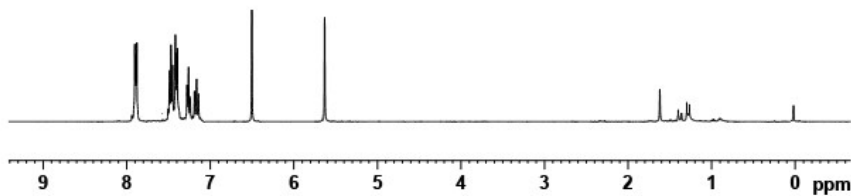

2.18  
1.98  
2.18  
1.10  
1.12

1.00

1.00

161.52  
159.02  
144.76  
141.90  
131.41  
131.21  
131.19  
127.23  
124.24  
124.21  
118.51  
116.10  
115.88  
112.61

77.33  
77.02  
76.70

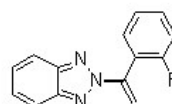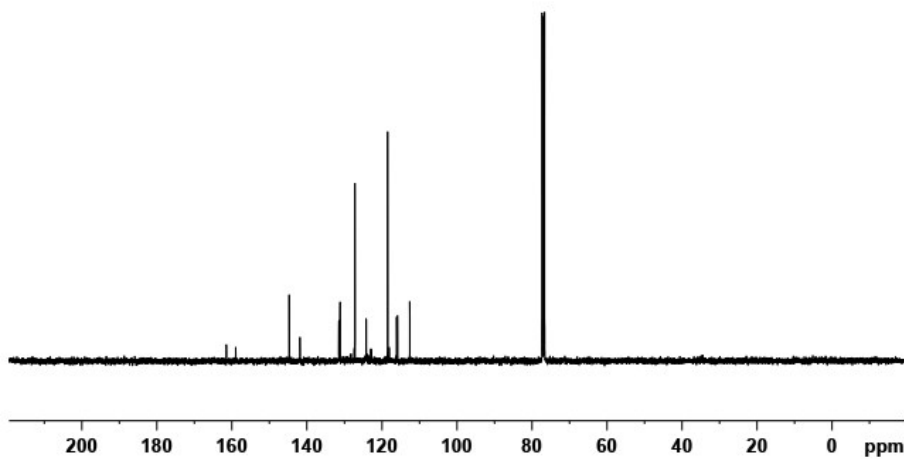

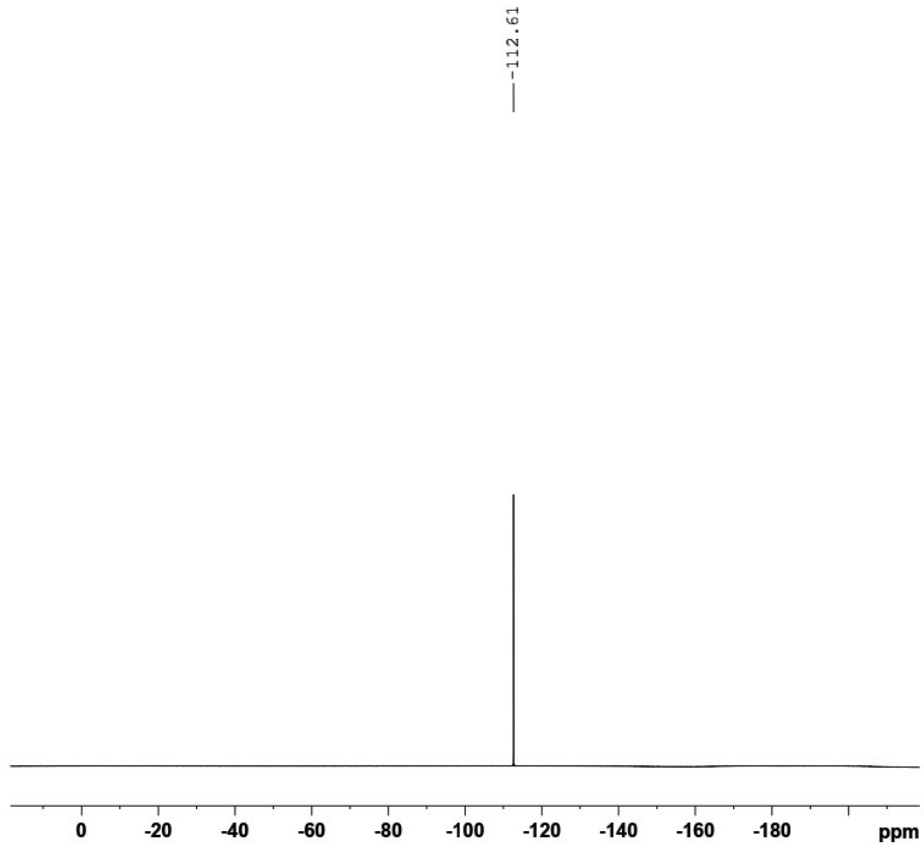

**Compound 4c**

7.929  
7.921  
7.912  
7.905  
7.458  
7.449  
7.440  
7.436  
7.433  
7.424  
7.416  
7.272  
7.156  
7.113  
7.113  
6.226  
5.616

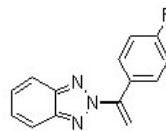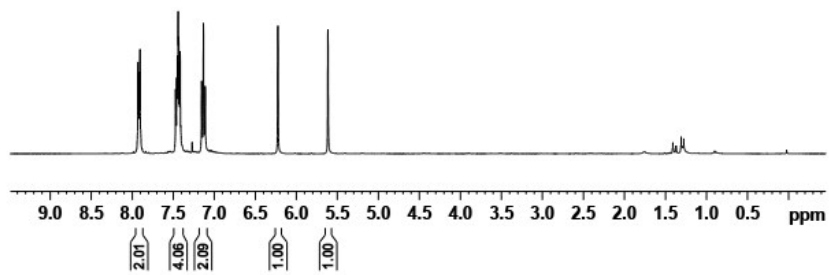



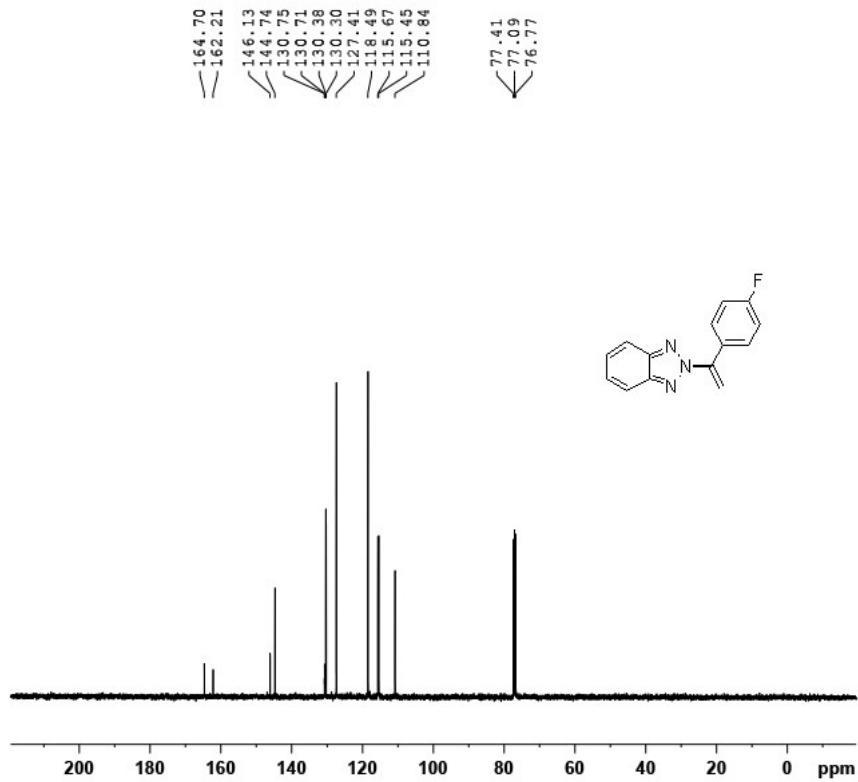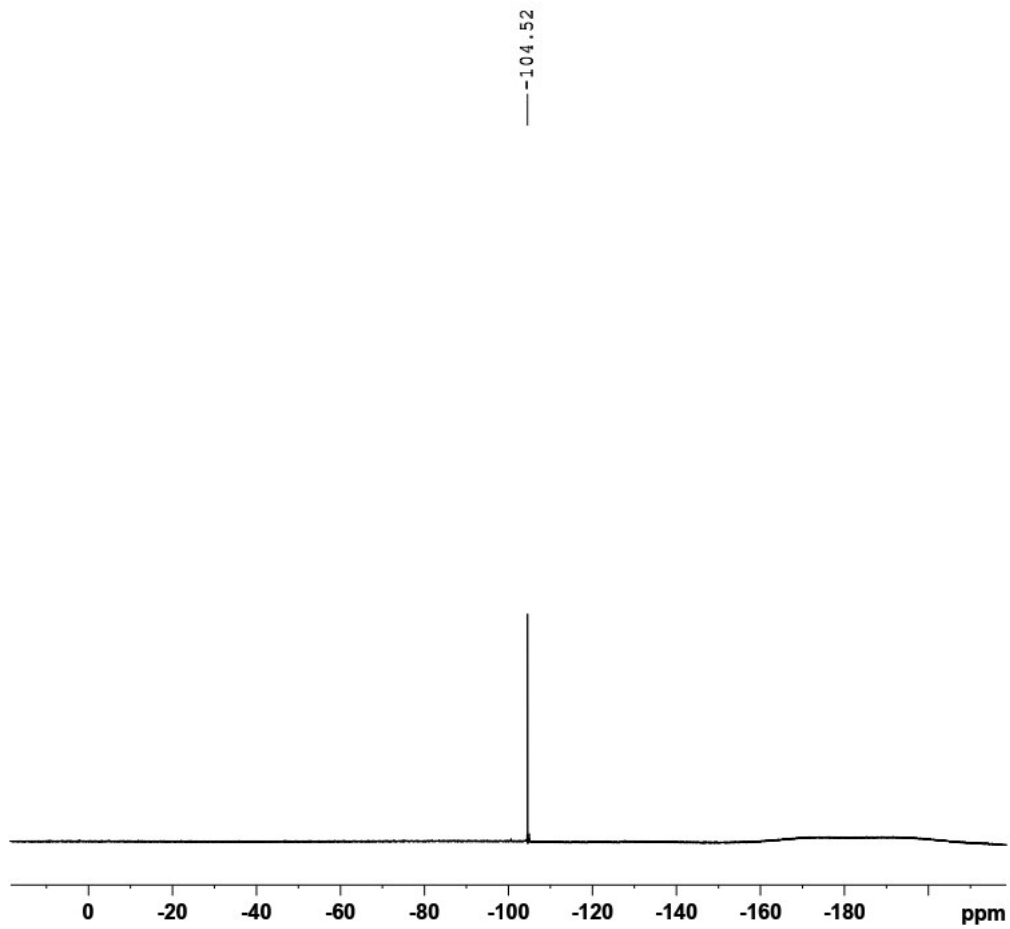

# Compound 4d

7.881  
7.873  
7.582  
7.579  
7.565  
7.560  
7.469  
7.451  
7.433  
7.415  
7.410  
7.402  
7.393  
7.385  
7.271  
6.564  
5.521

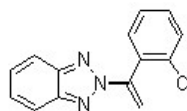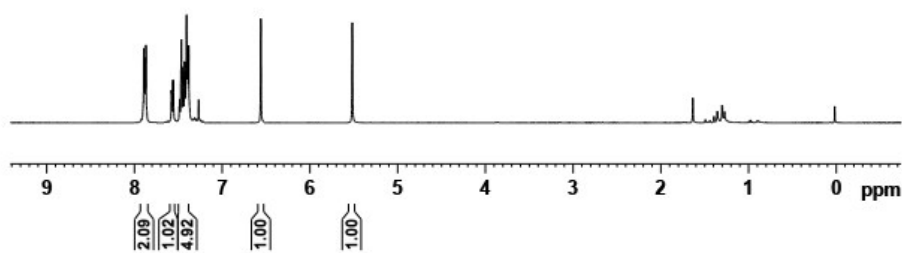

144.81  
144.66  
134.14  
134.09  
131.88  
130.81  
129.88  
127.23  
126.98  
118.55  
111.94  
77.35  
77.04  
76.72

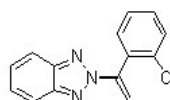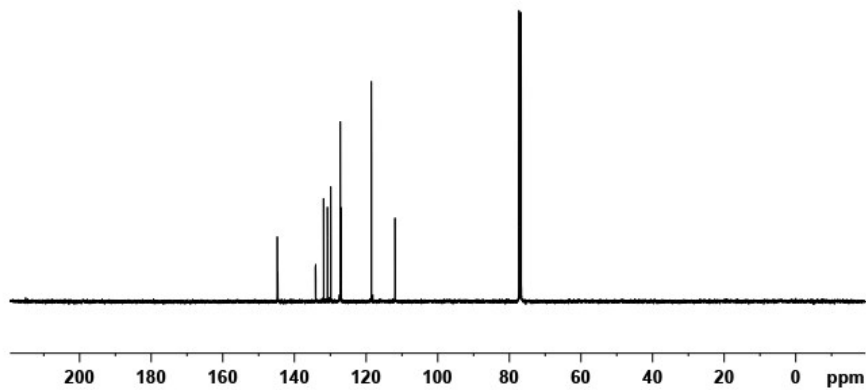

# Compound 4e

7.930  
7.923  
7.914  
7.906  
7.871  
7.454  
7.446  
7.437  
7.430  
7.381  
7.363  
7.349  
7.330  
7.271  
6.267  
5.678

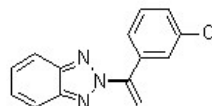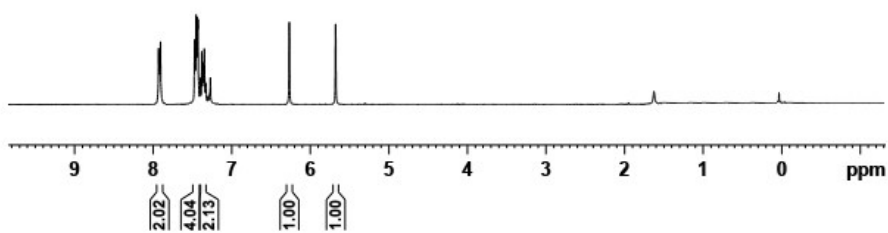

145.86  
144.78  
136.32  
134.46  
129.70  
128.49  
127.47  
126.57  
124.37  
118.51  
111.84

77.34  
77.03  
76.71

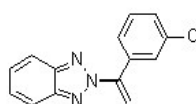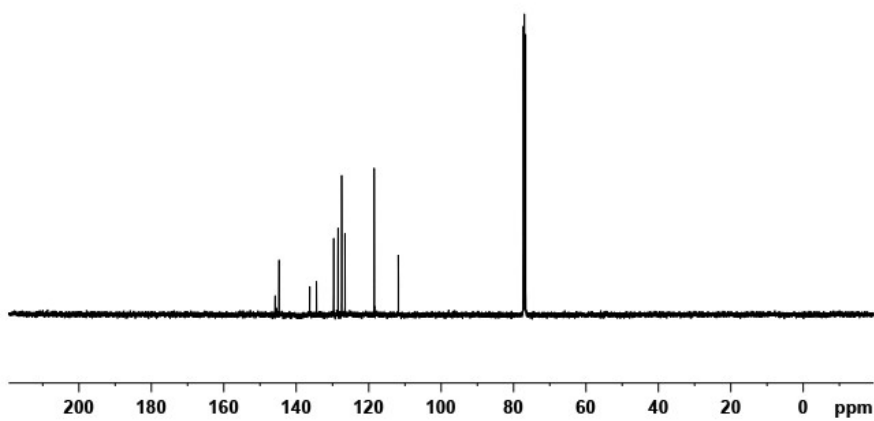

# Compound 4f

7.925  
7.917  
7.908  
7.901  
7.449  
7.442  
7.433  
7.425  
7.416  
7.413  
7.396  
7.390  
7.271  
6.244  
5.651

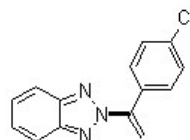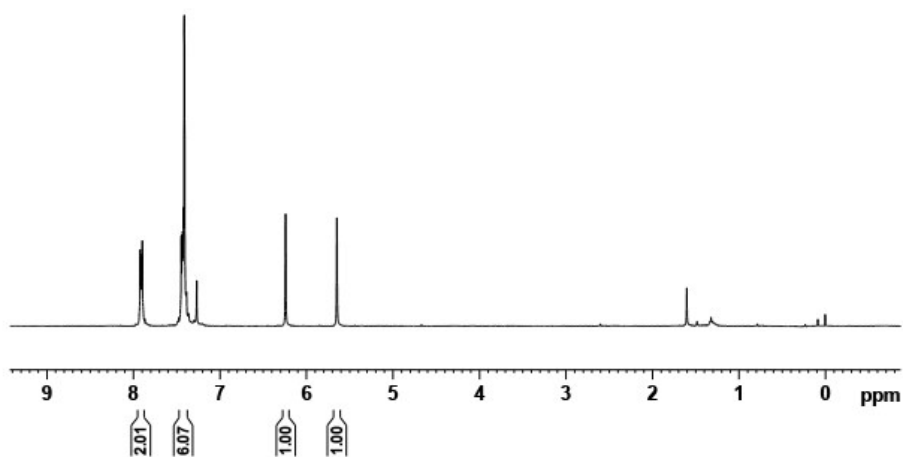

146.08  
144.75  
135.66  
133.05  
129.69  
128.73  
127.45  
118.48  
111.21

77.34  
77.02  
76.70

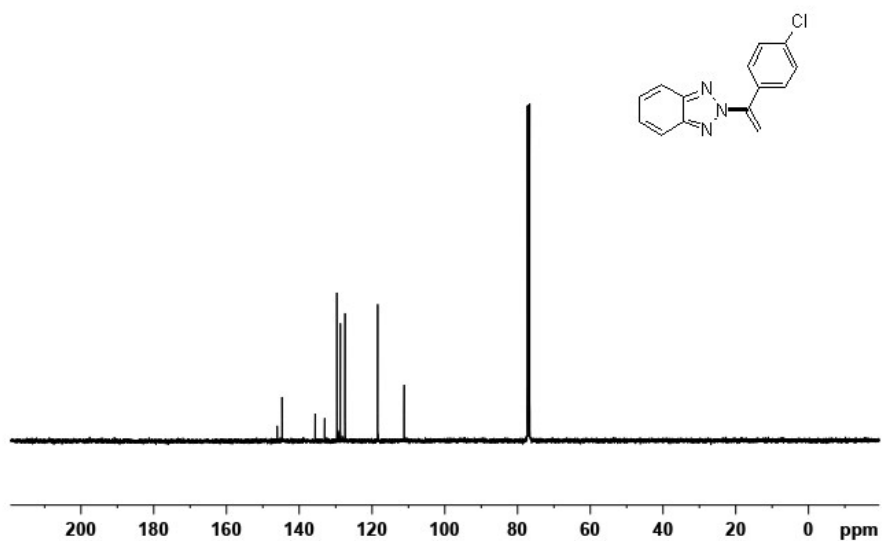

# Compound 4g

7.899  
7.890  
7.882  
7.679  
7.659  
7.589  
7.585  
7.570  
7.566  
7.467  
7.465  
7.410  
7.403  
7.394  
7.386  
7.380  
7.365  
7.361  
7.274  
6.572  
5.505

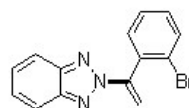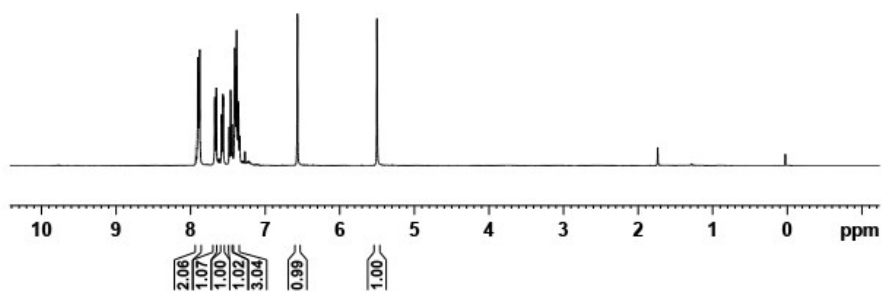

145.89  
144.83  
136.06  
133.09  
132.11  
130.95  
127.61  
127.30  
123.83  
118.58  
111.75  
77.43  
77.11  
76.80

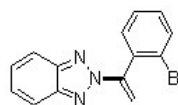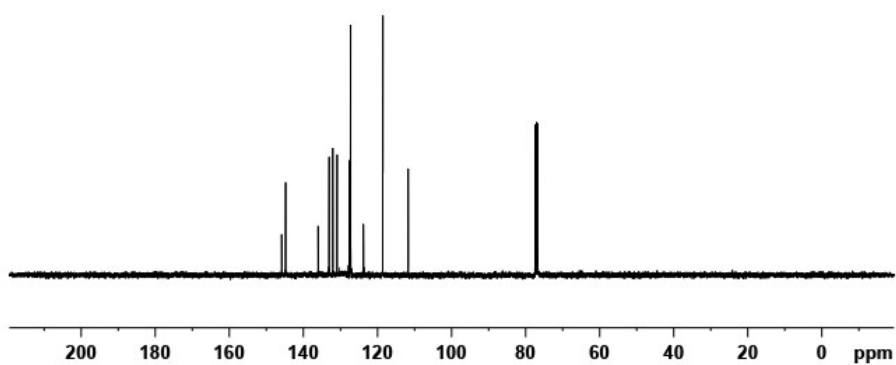

# Compound 4h

7.903  
7.627  
7.600  
7.581  
7.440  
7.432  
7.390  
7.371  
7.330  
7.311  
7.292  
7.270  
6.262  
5.663

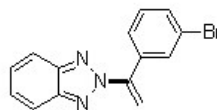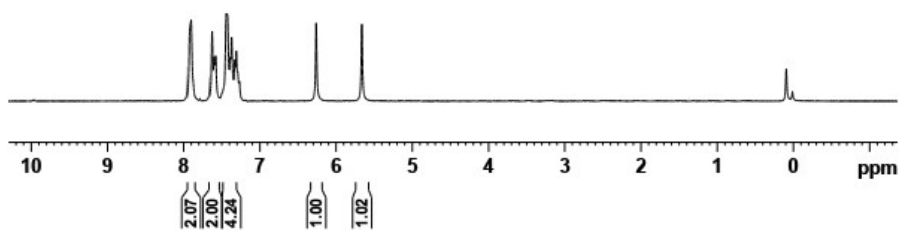

145.73  
144.78  
136.57  
132.59  
131.33  
129.94  
127.48  
127.05  
122.53  
118.51  
111.87

77.36  
77.04  
76.72

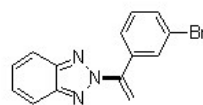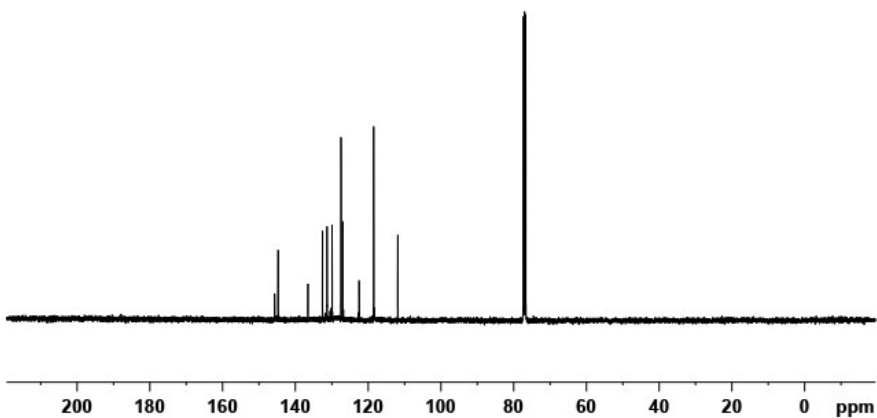

# Compound 4i

7.923  
7.915  
7.906  
7.898  
7.593  
7.571  
7.450  
7.443  
7.434  
7.426  
7.352  
7.331  
7.272  
6.249  
6.247  
5.657

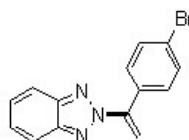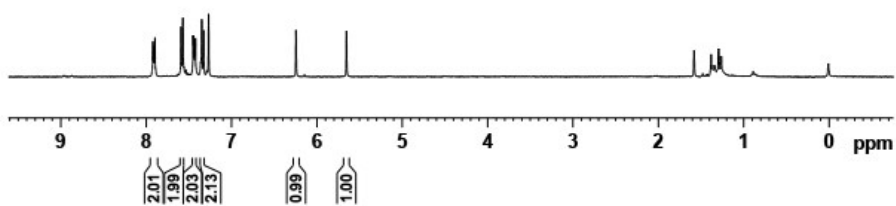

146.15  
144.76  
133.53  
131.68  
129.94  
127.45  
123.94  
118.48  
111.22

77.32  
77.00  
76.68

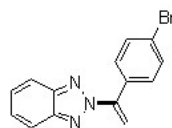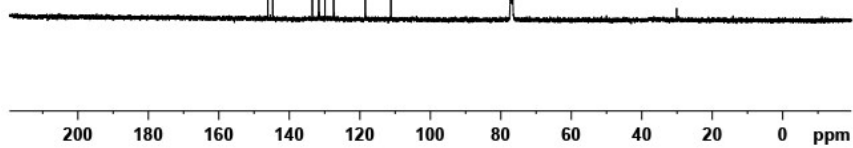

# Compound 4j

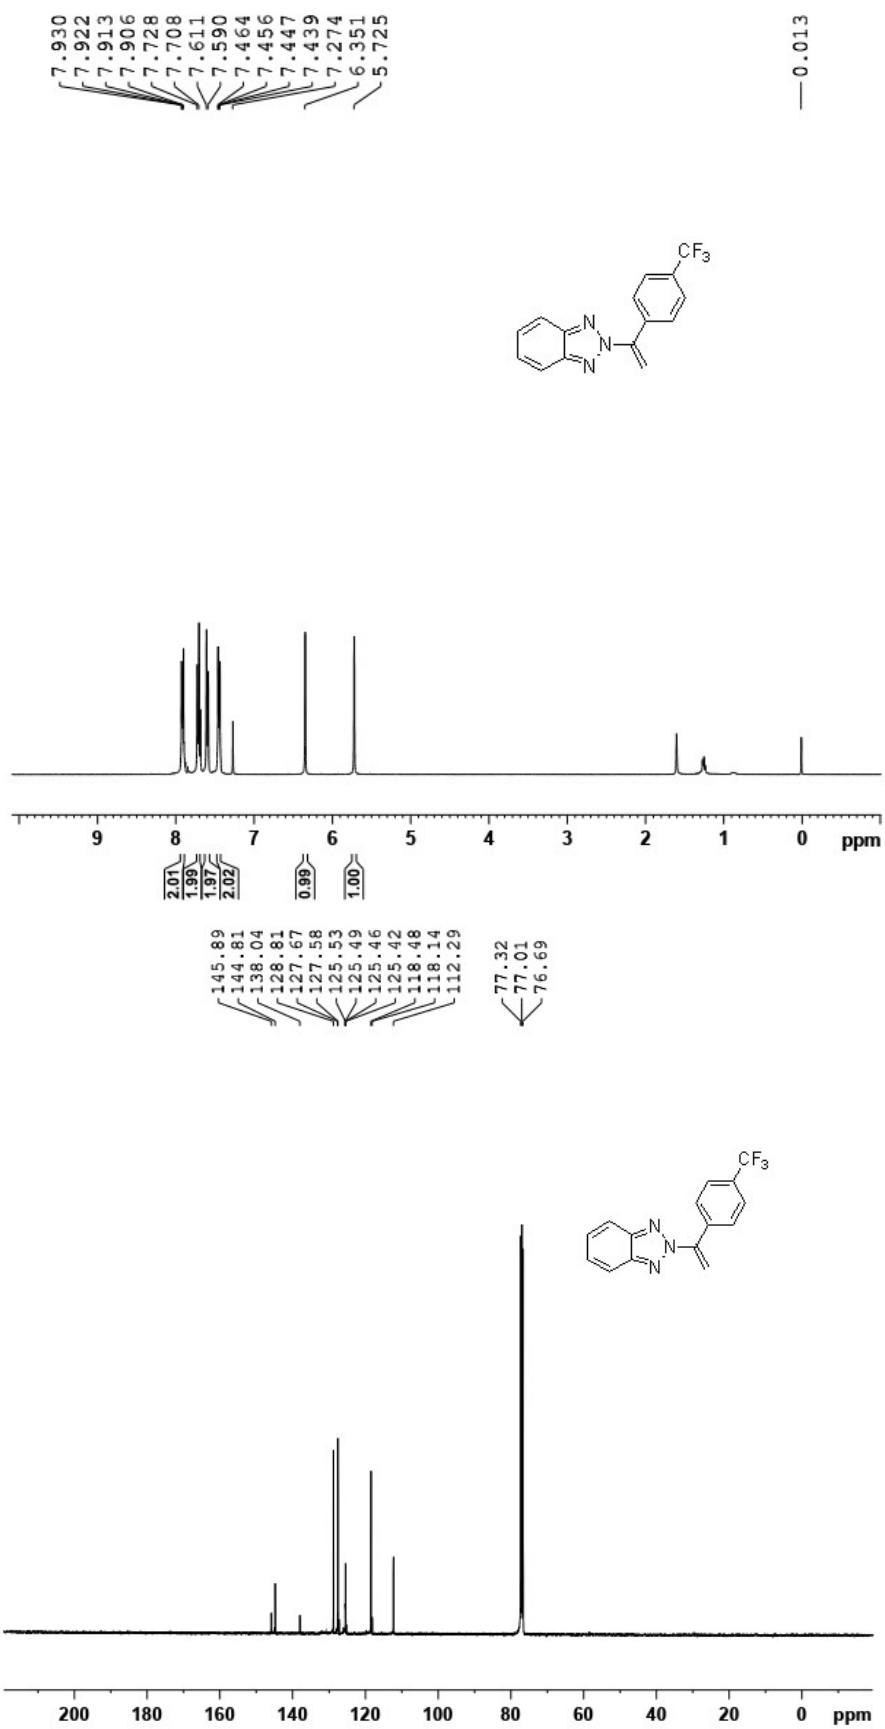



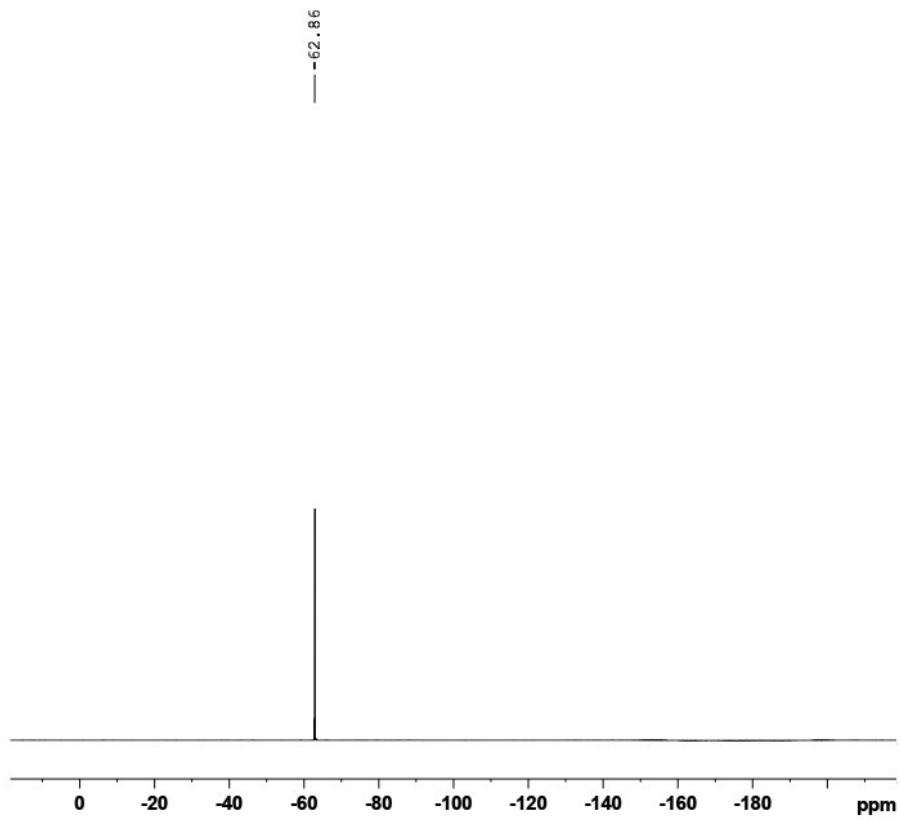

**Compound 4k**

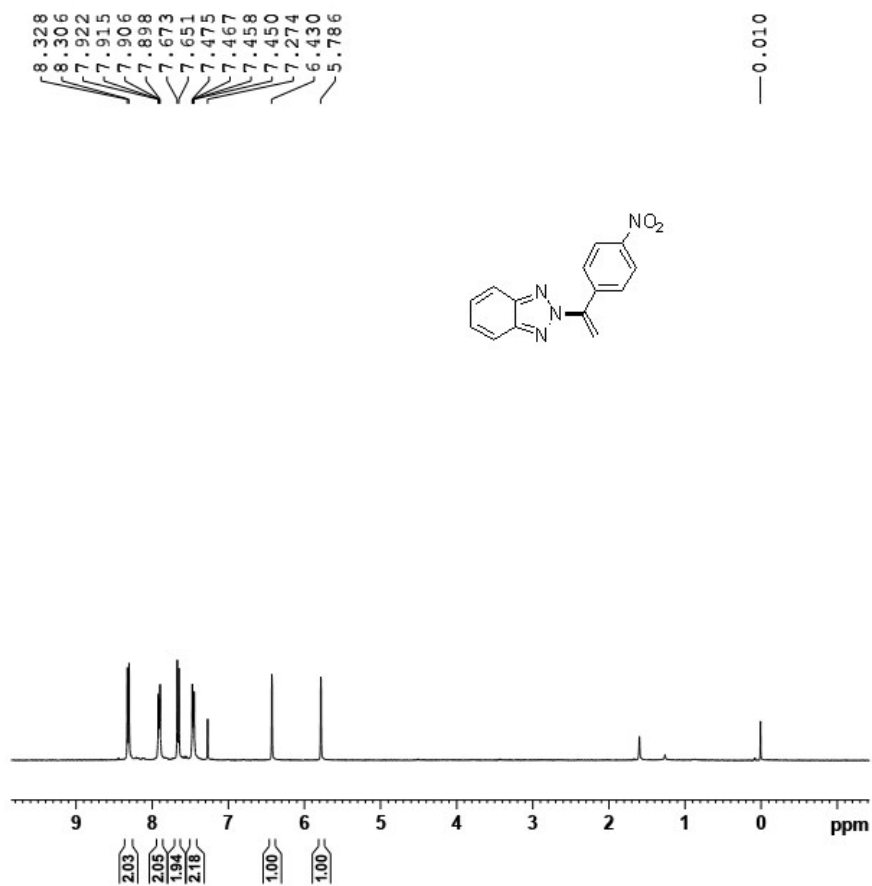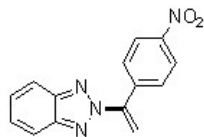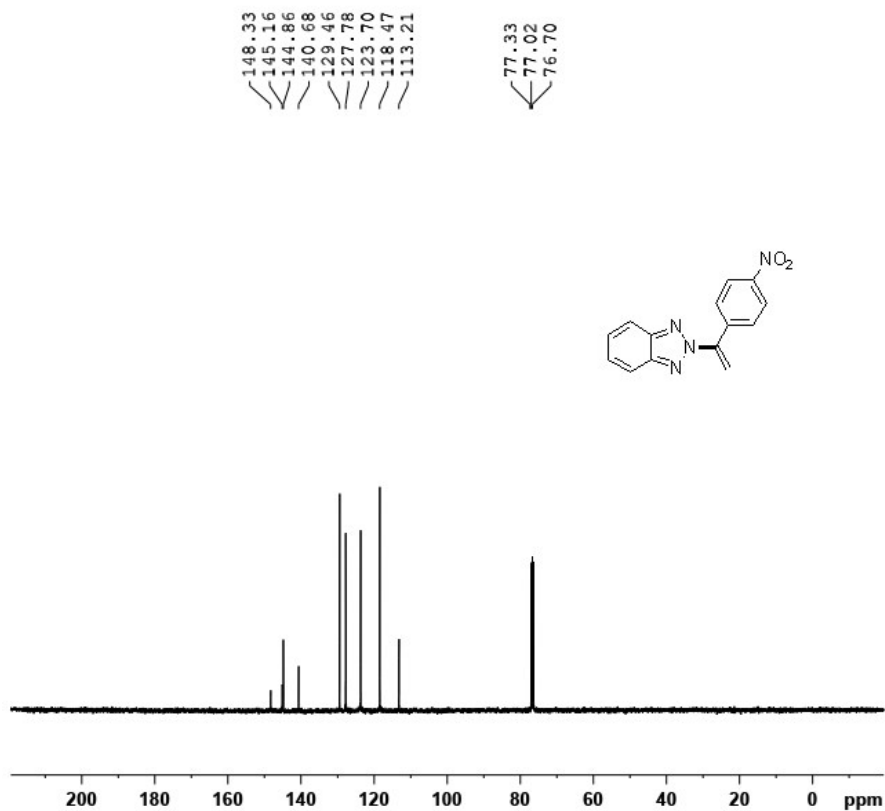

# Compound 4l

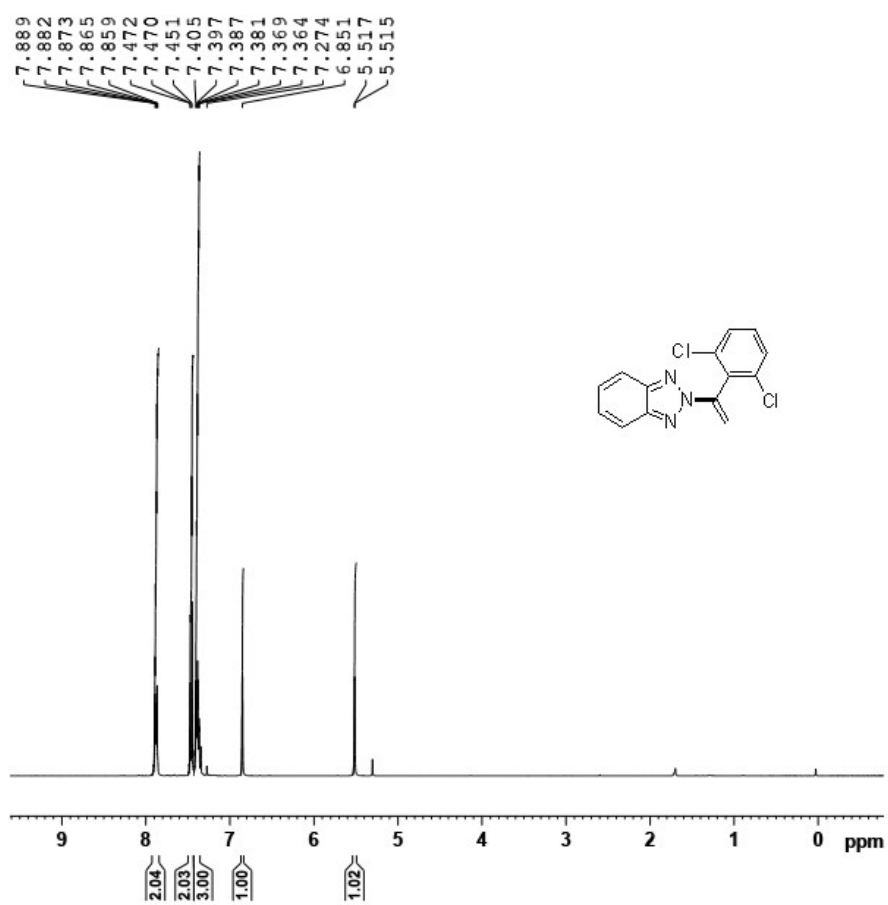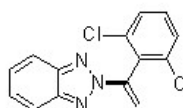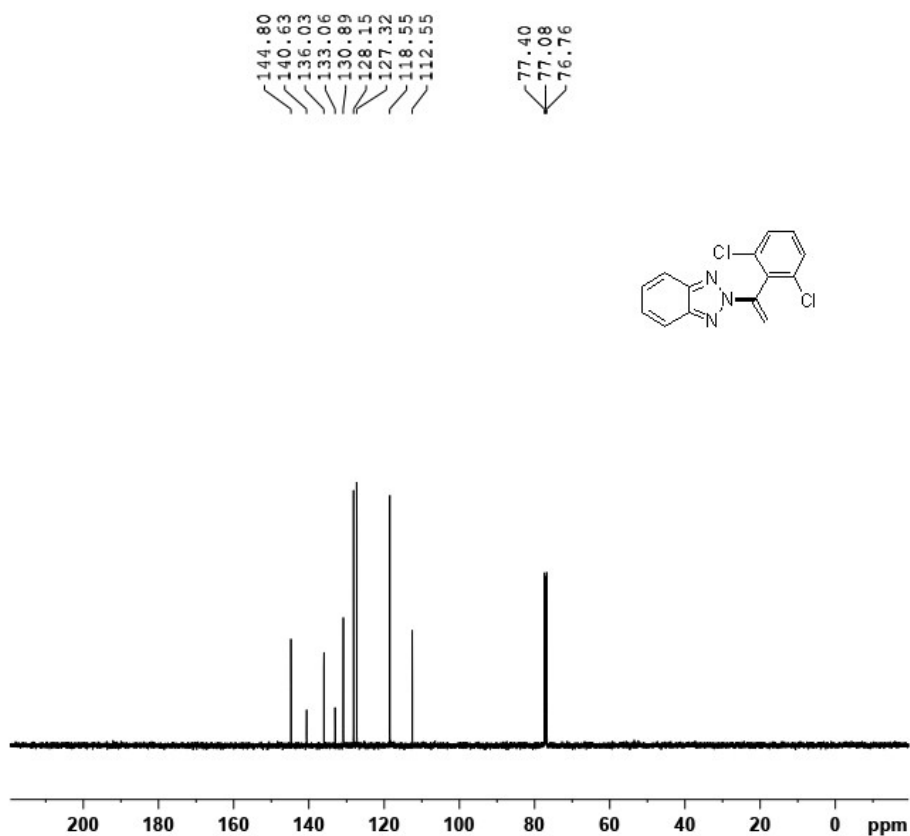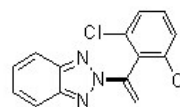

# Compound 4m

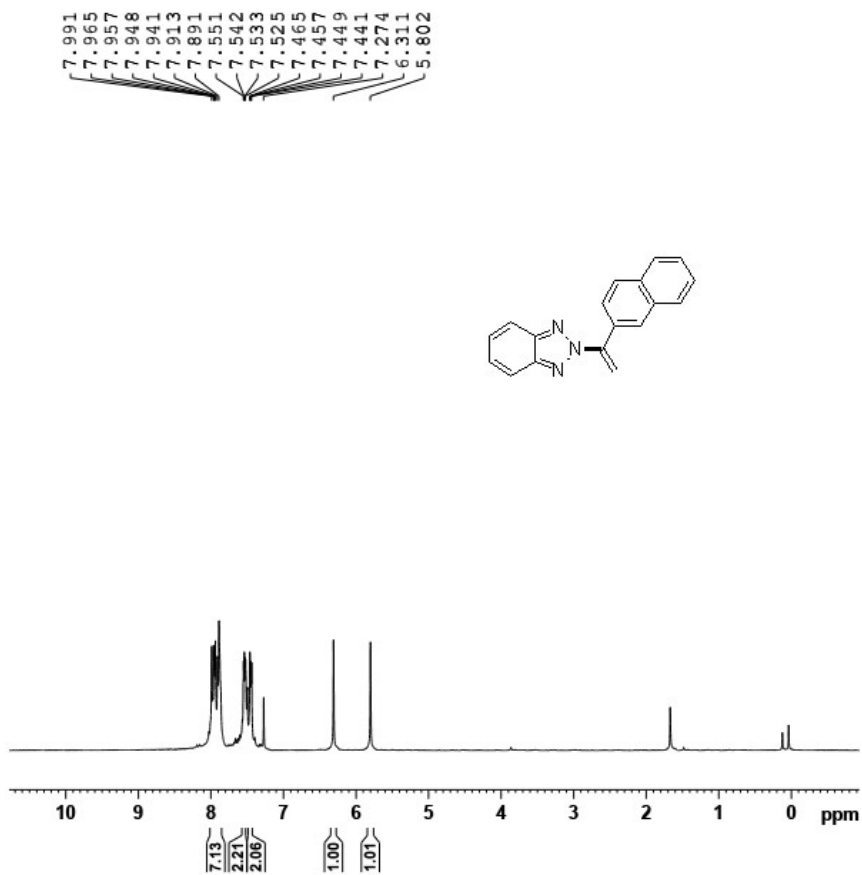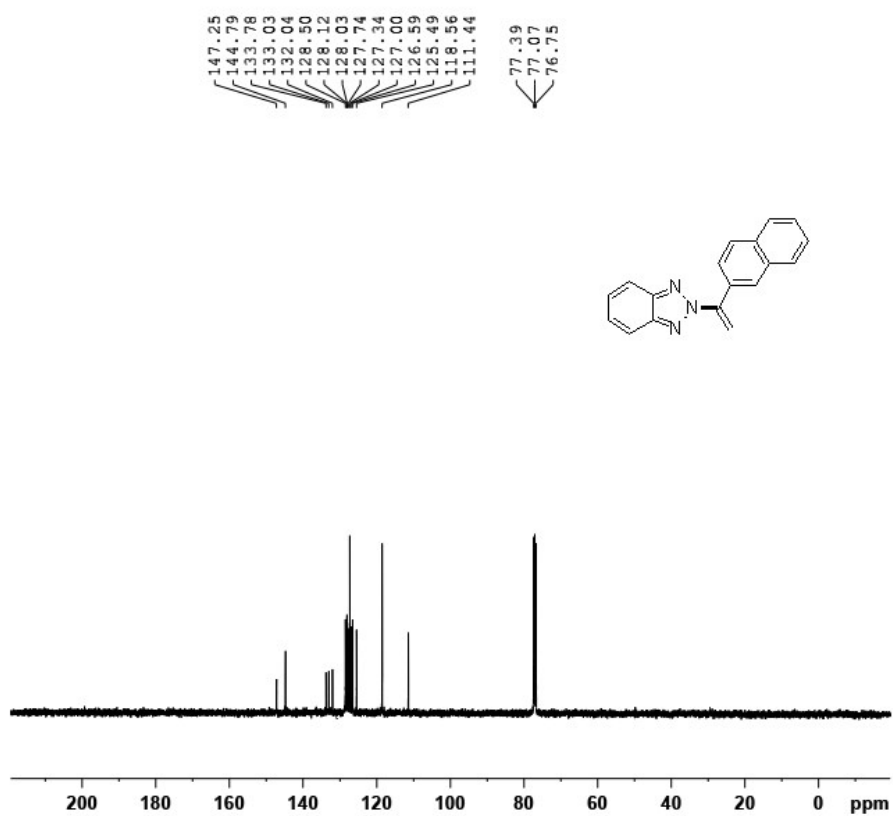

# Compound 4n

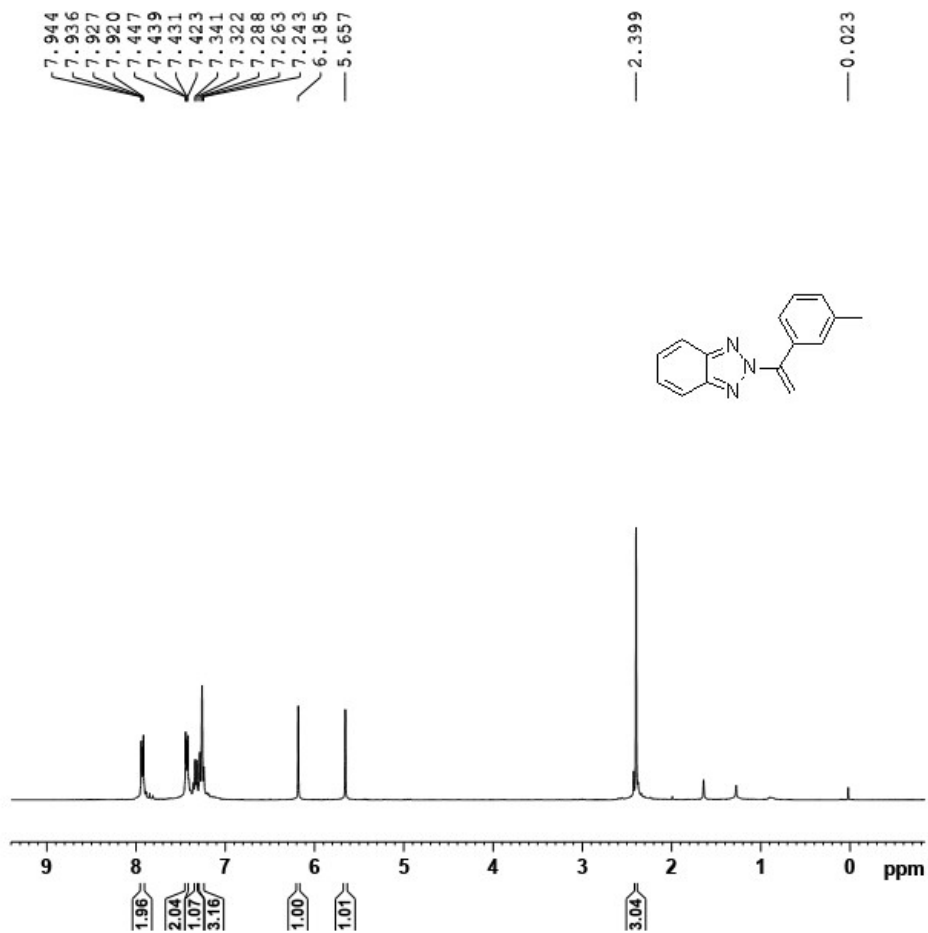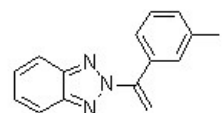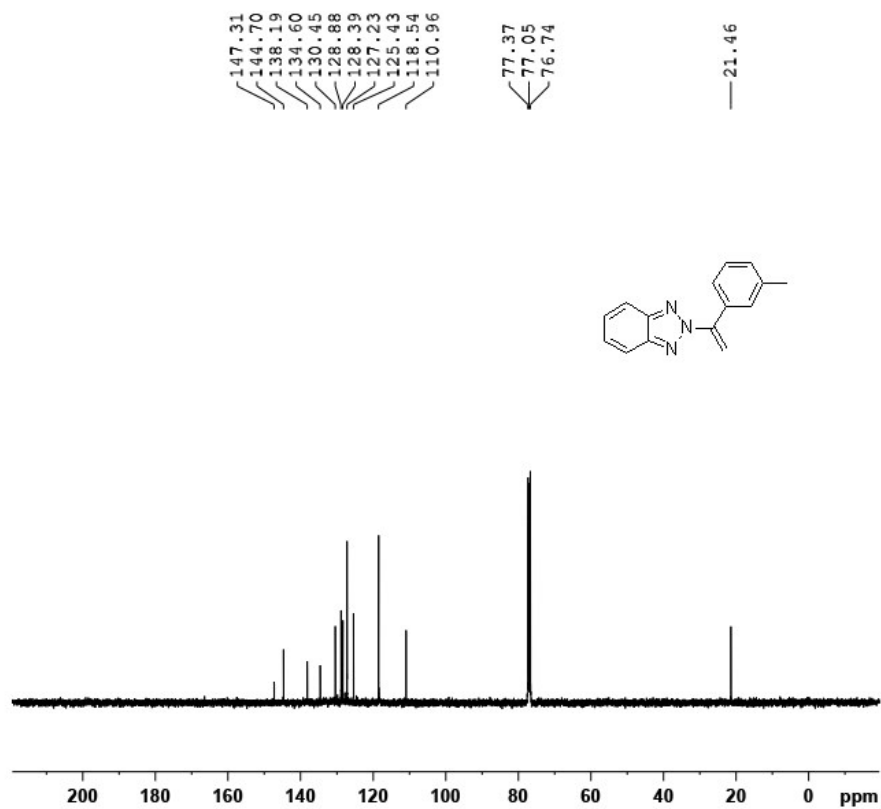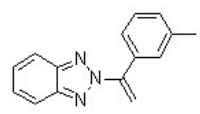

Compound 4o

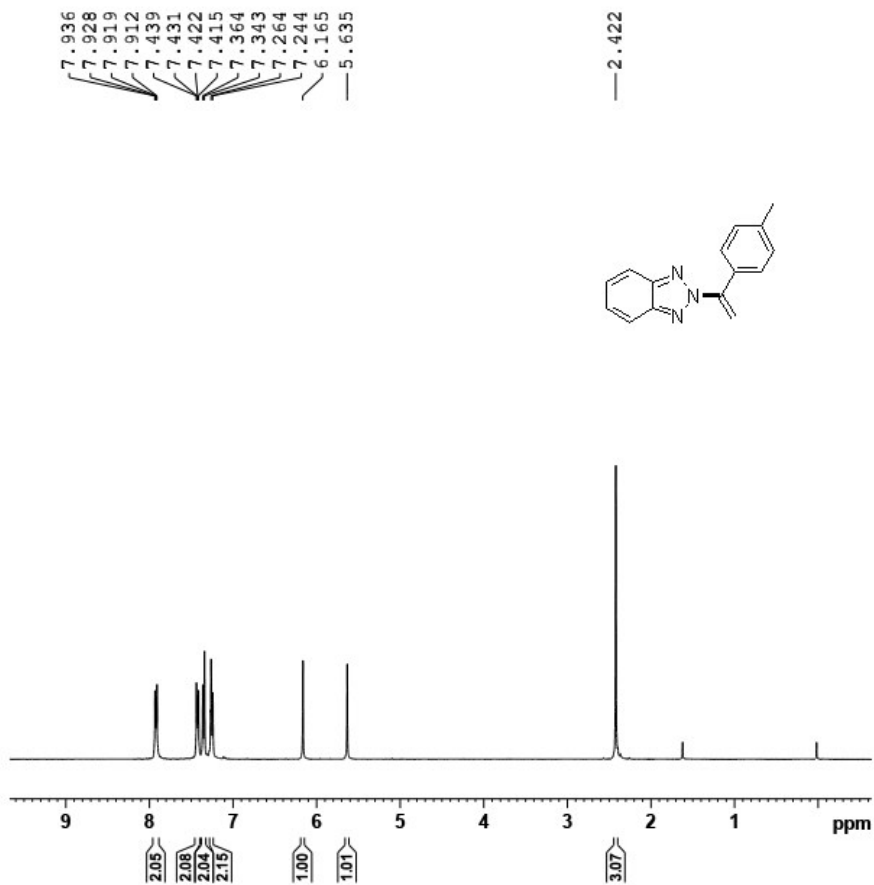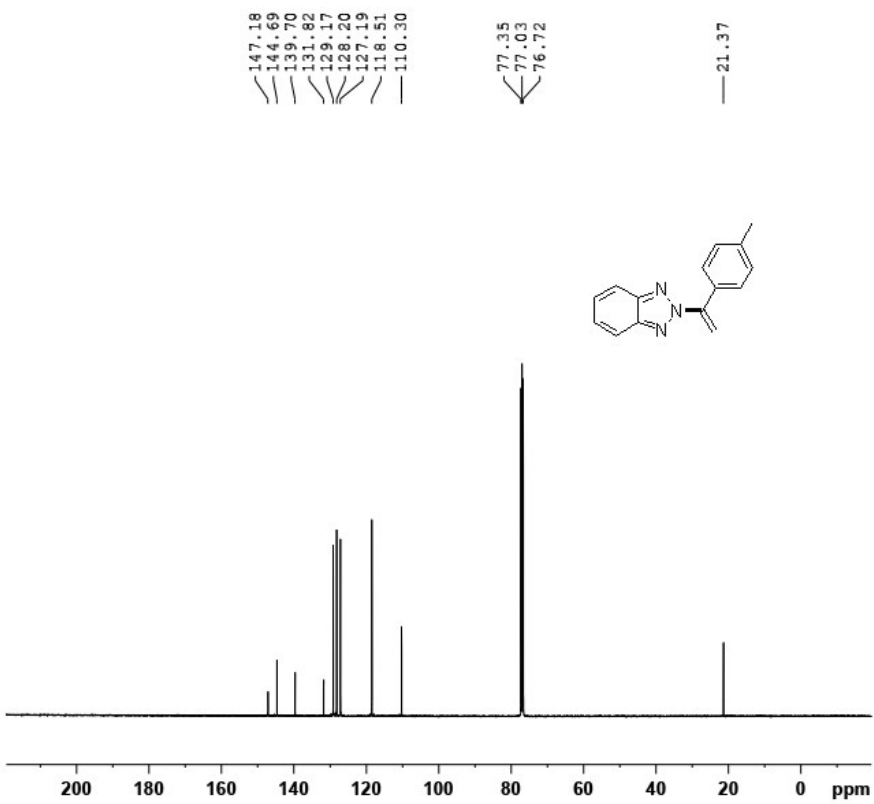

Compound 4p

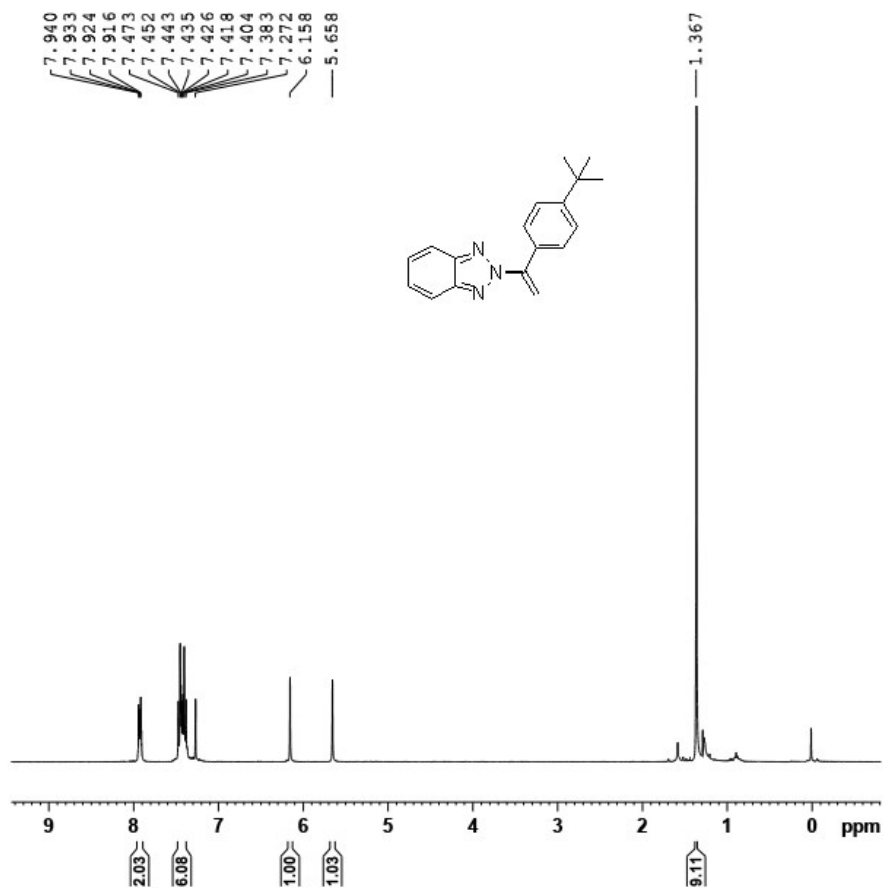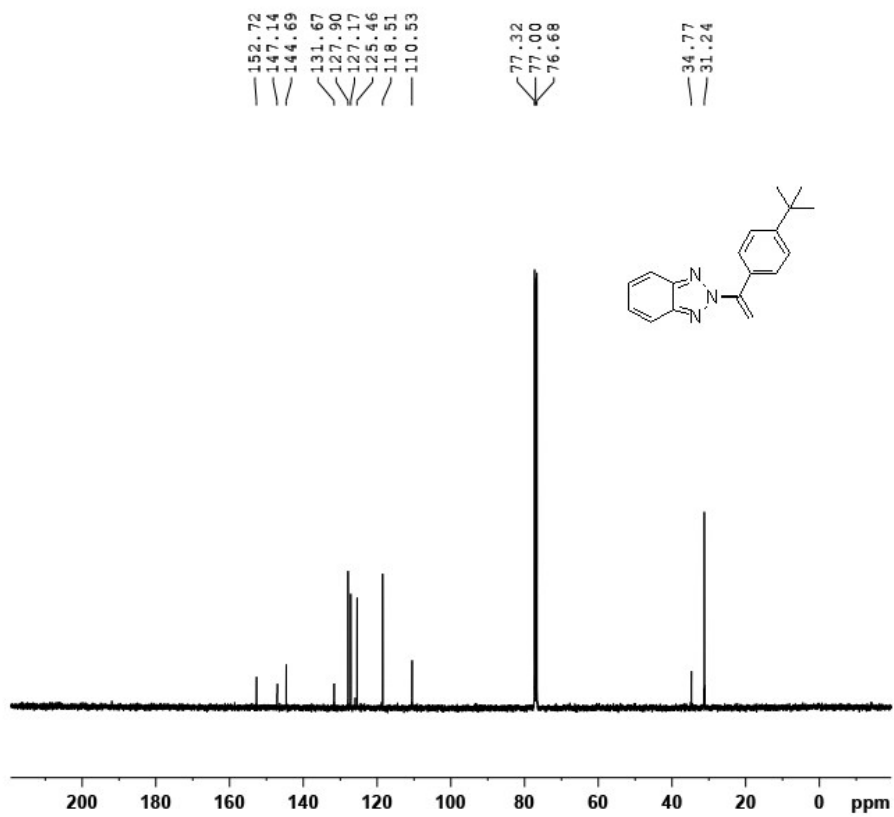

Compound 4q

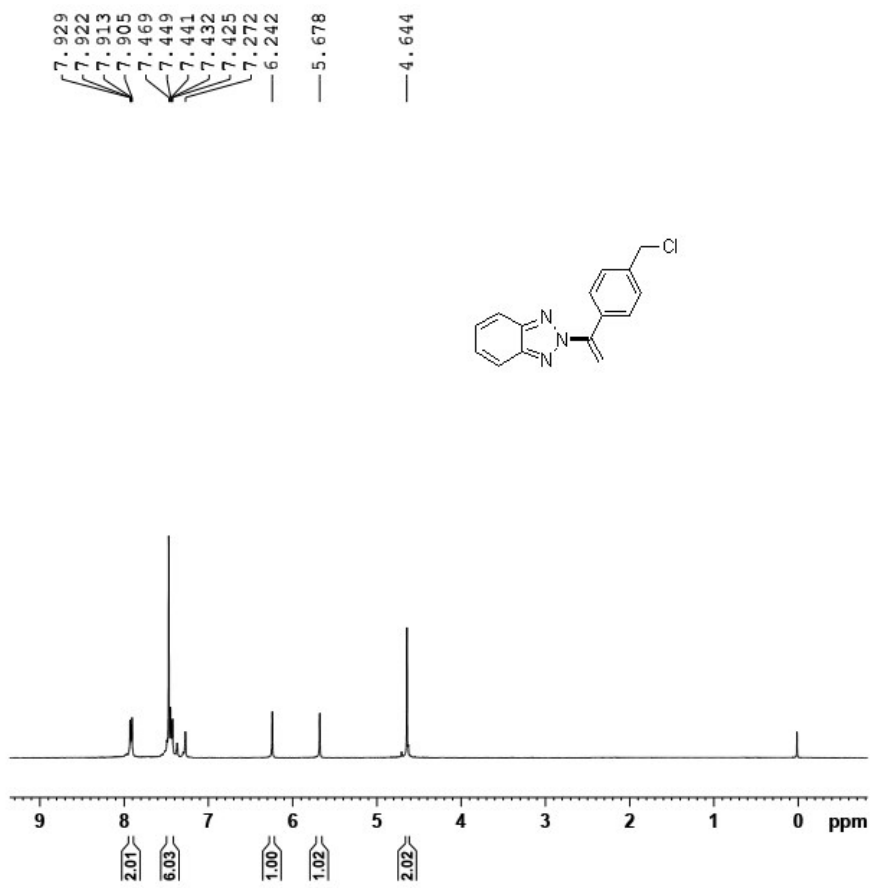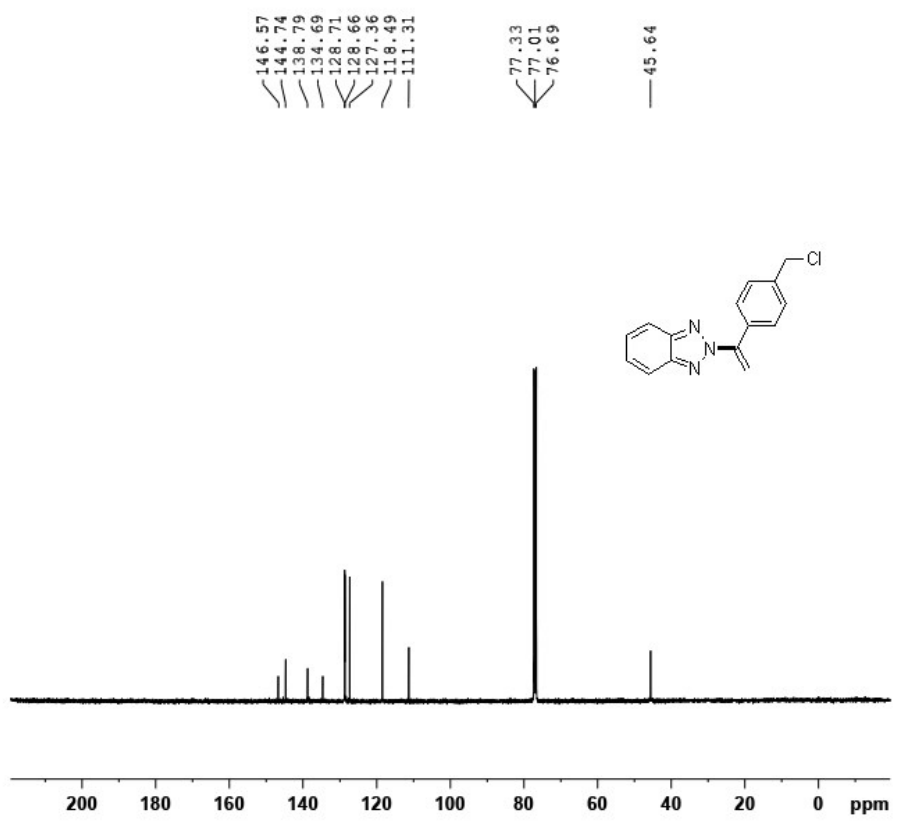

Compound 4r



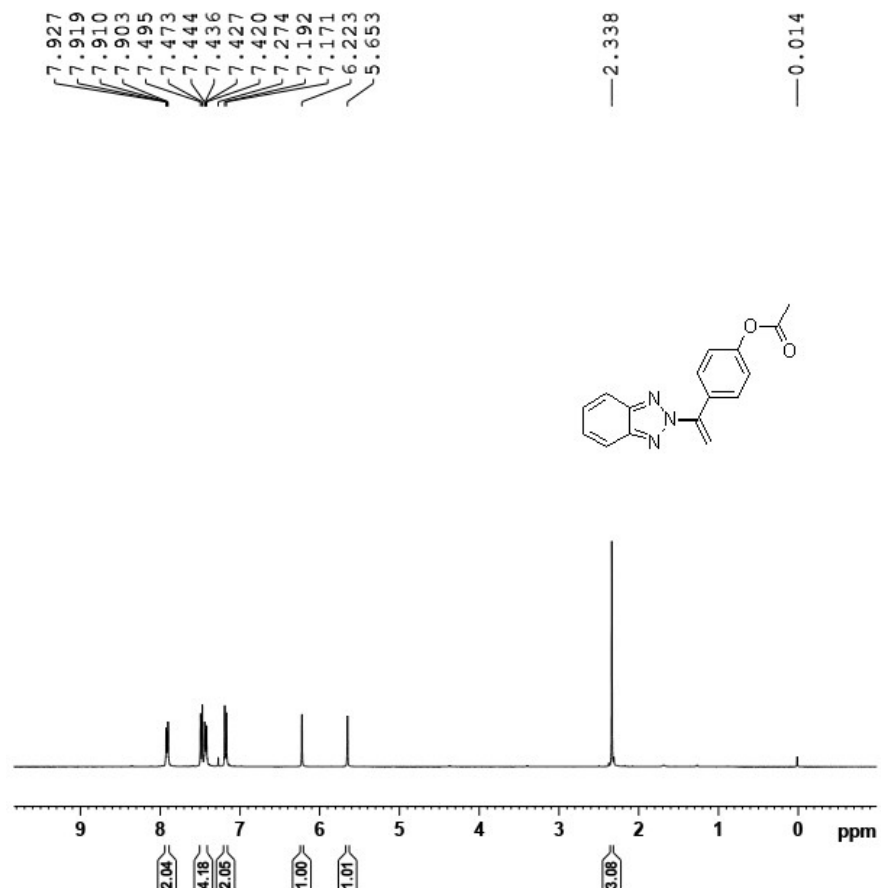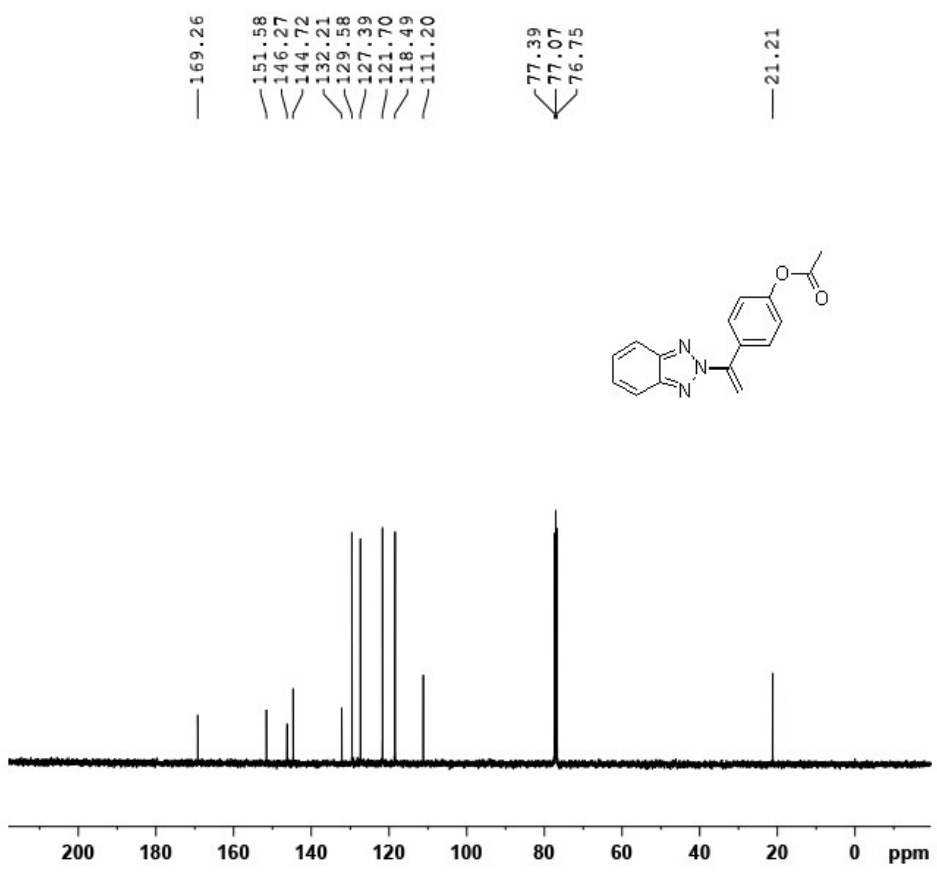

Compound 4s

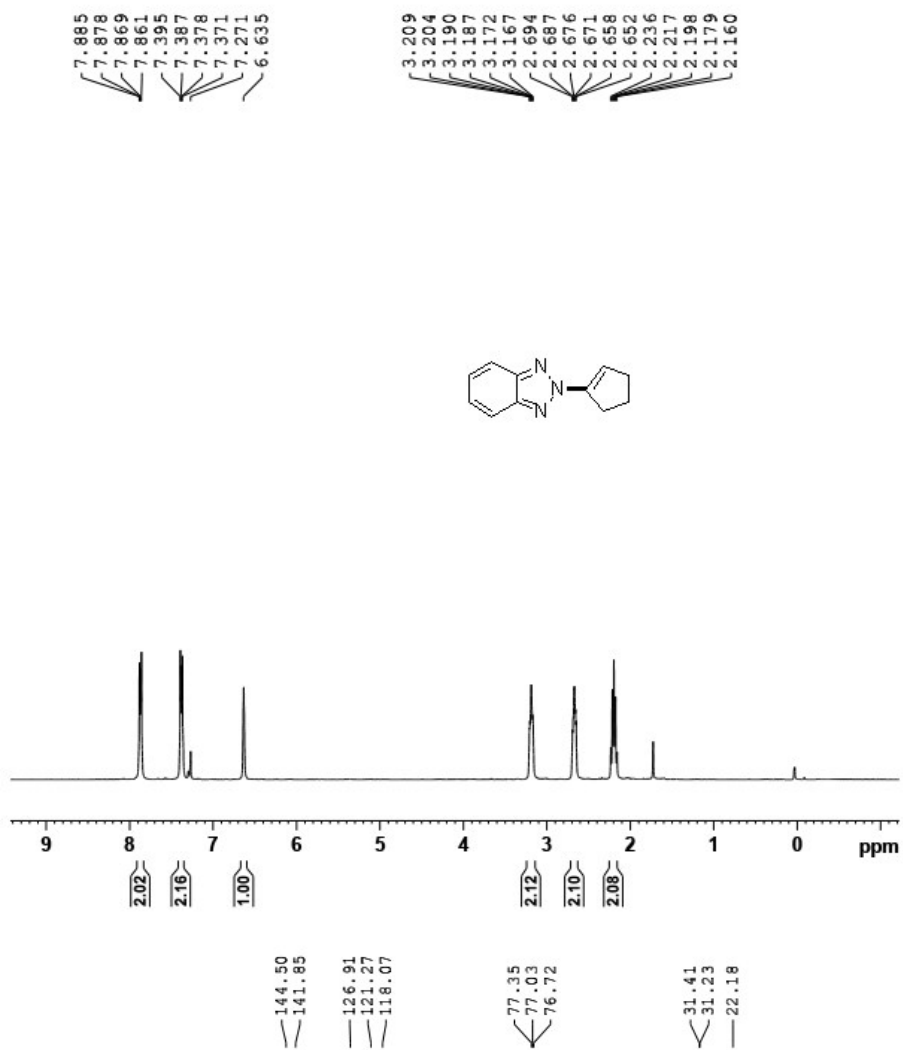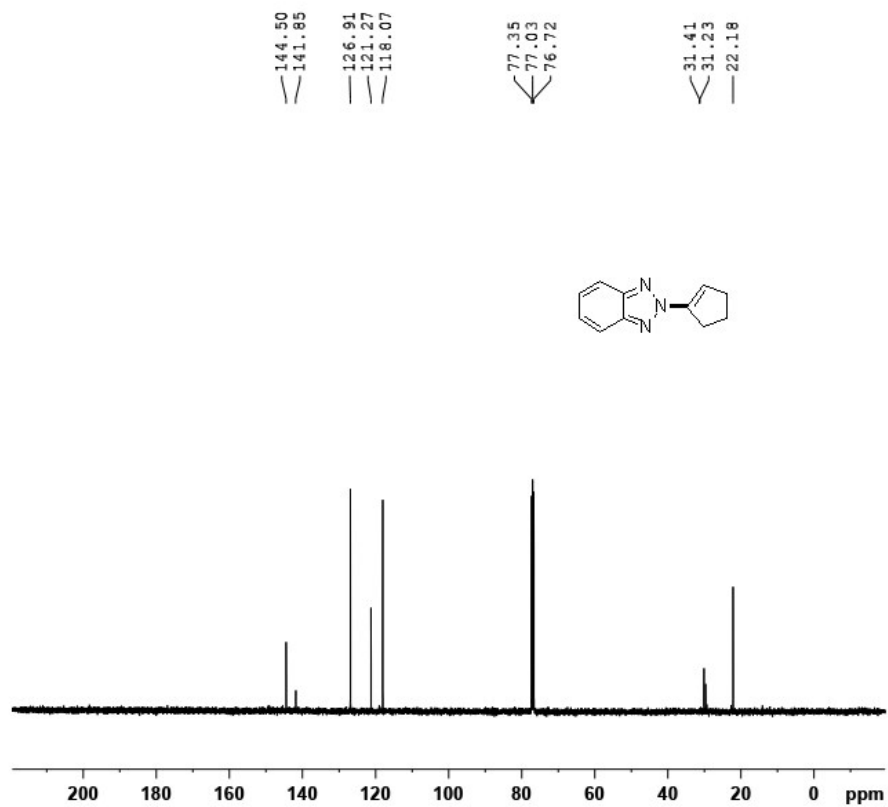

Compound 4t

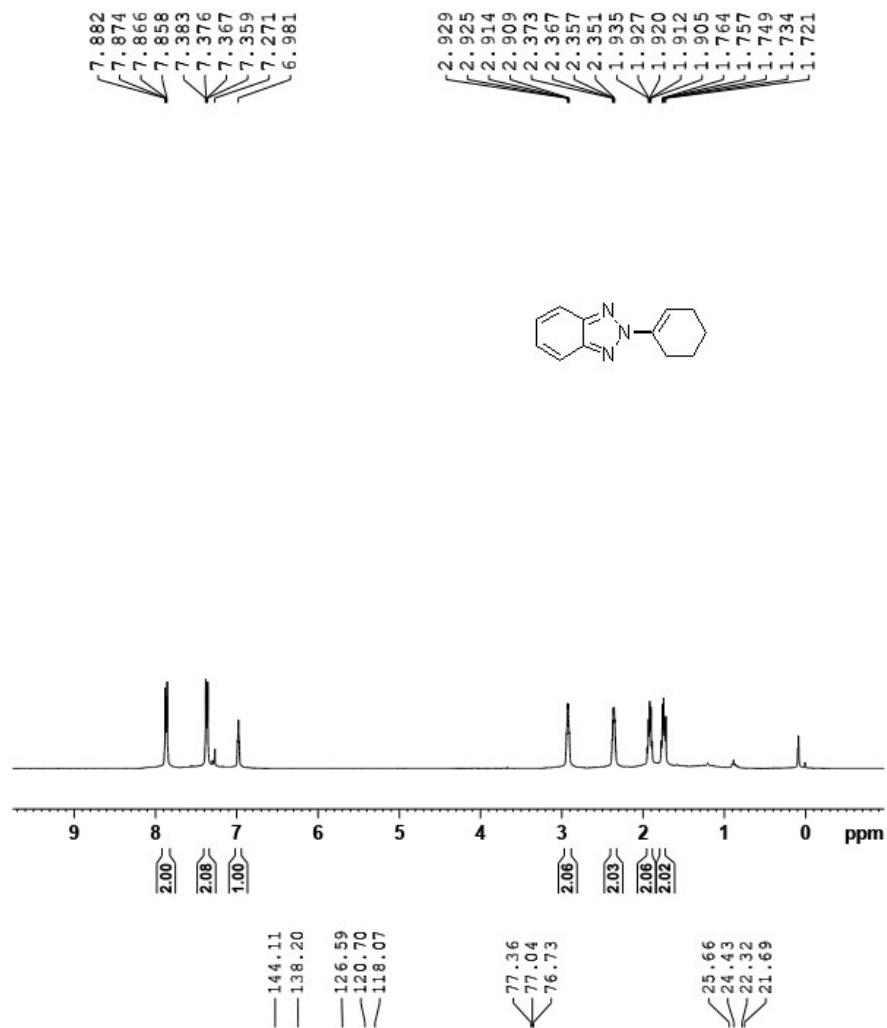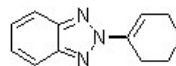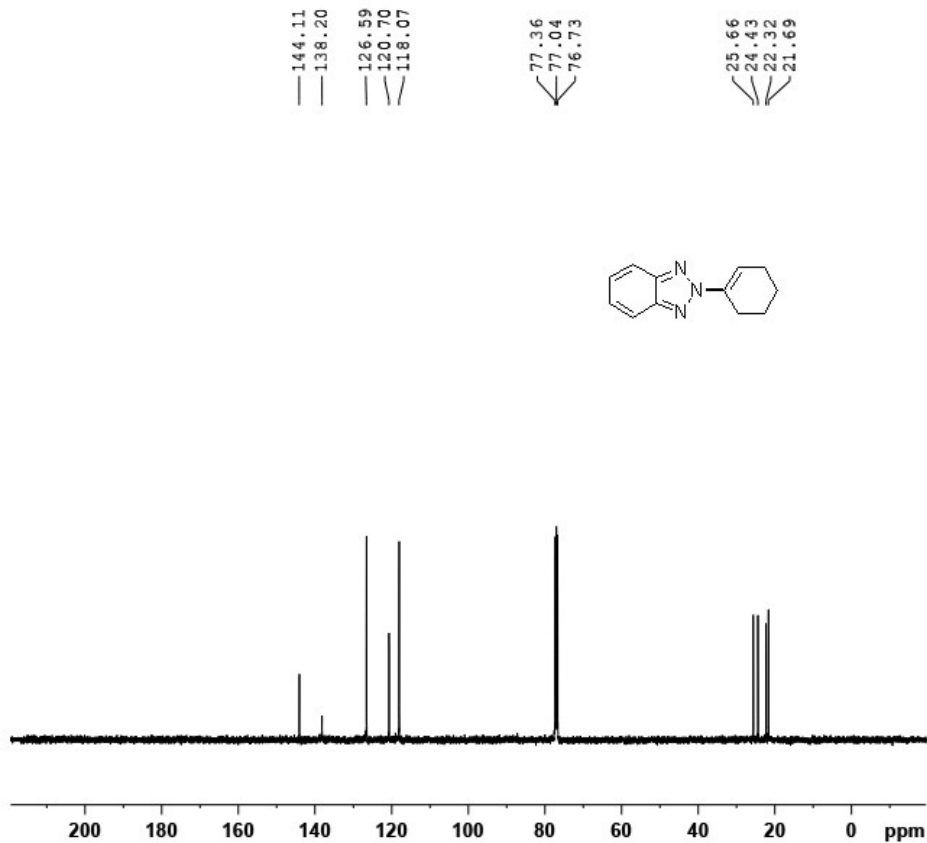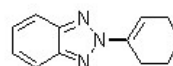

Compound 4u

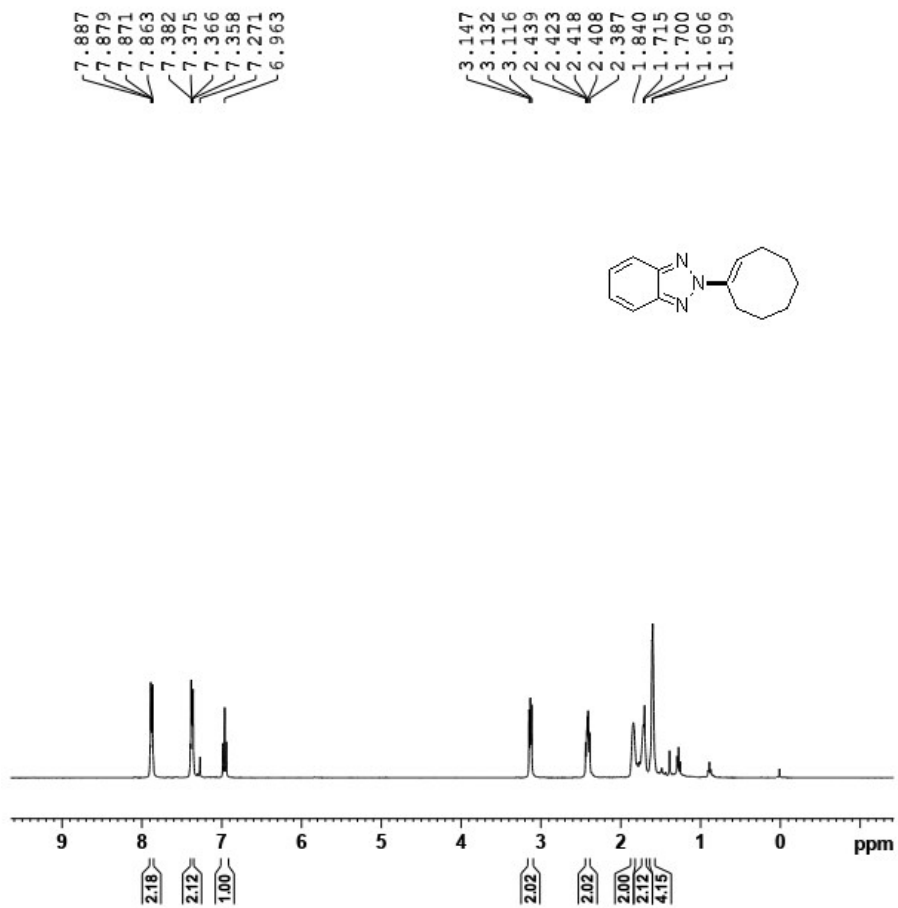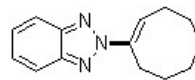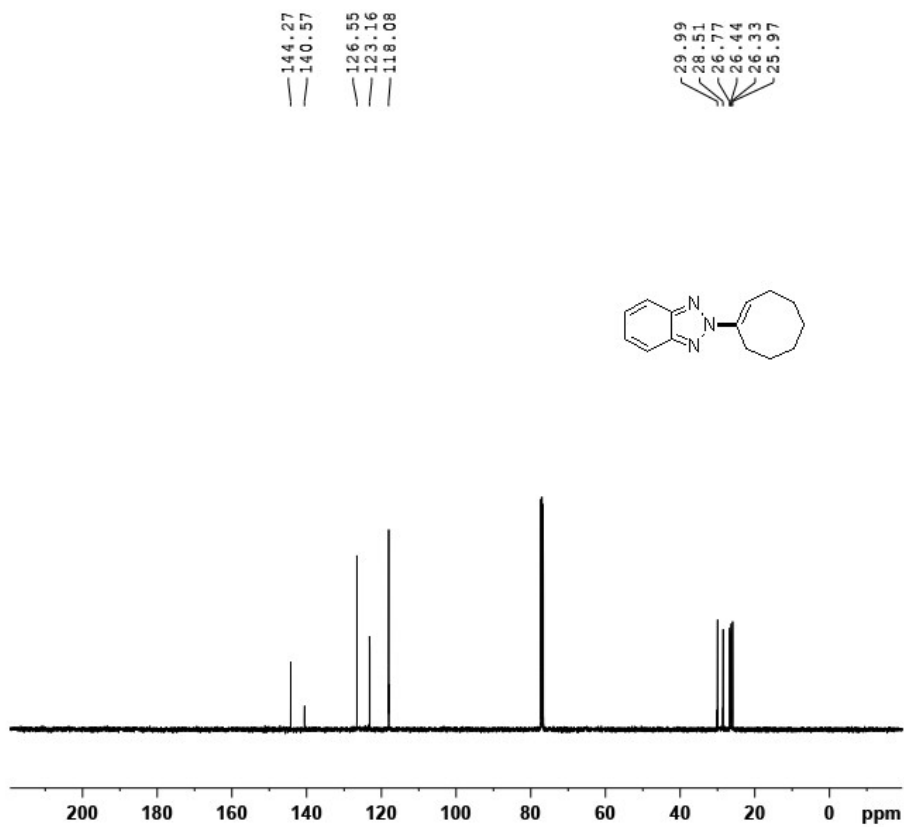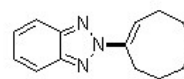

Compound 4v

7.872  
7.865  
7.444  
7.436  
7.428  
7.420  
7.274  
6.703  
6.698  
6.693  
5.336  
5.330  
5.324  
5.319  
5.311  
5.306  
5.023  
5.018  
5.009  
5.005  
4.998  
4.993

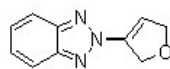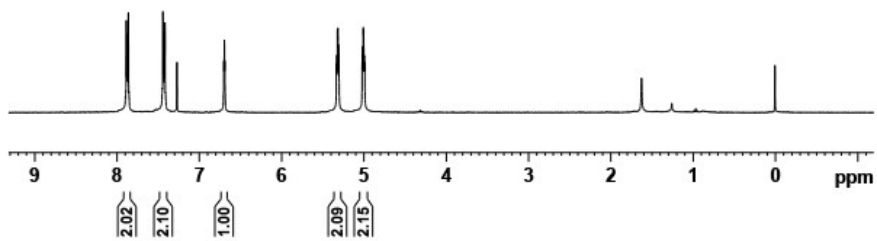

144.76  
127.68  
118.18  
115.20  
77.35  
77.03  
76.71  
75.59  
72.25

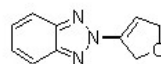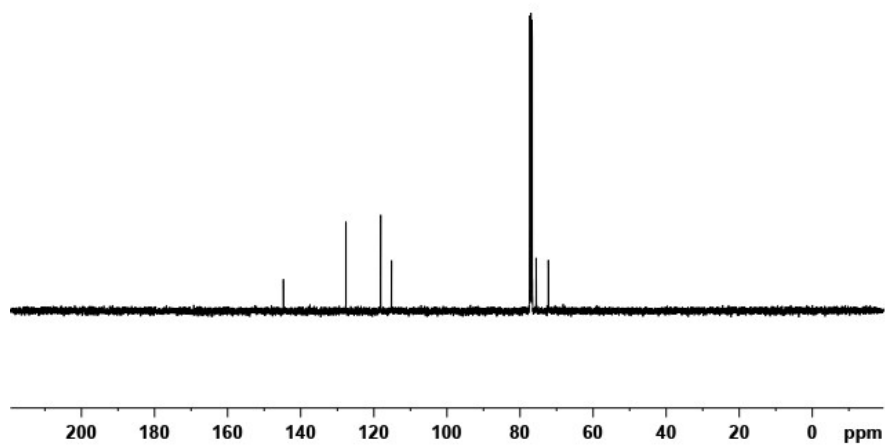

Compound 4w

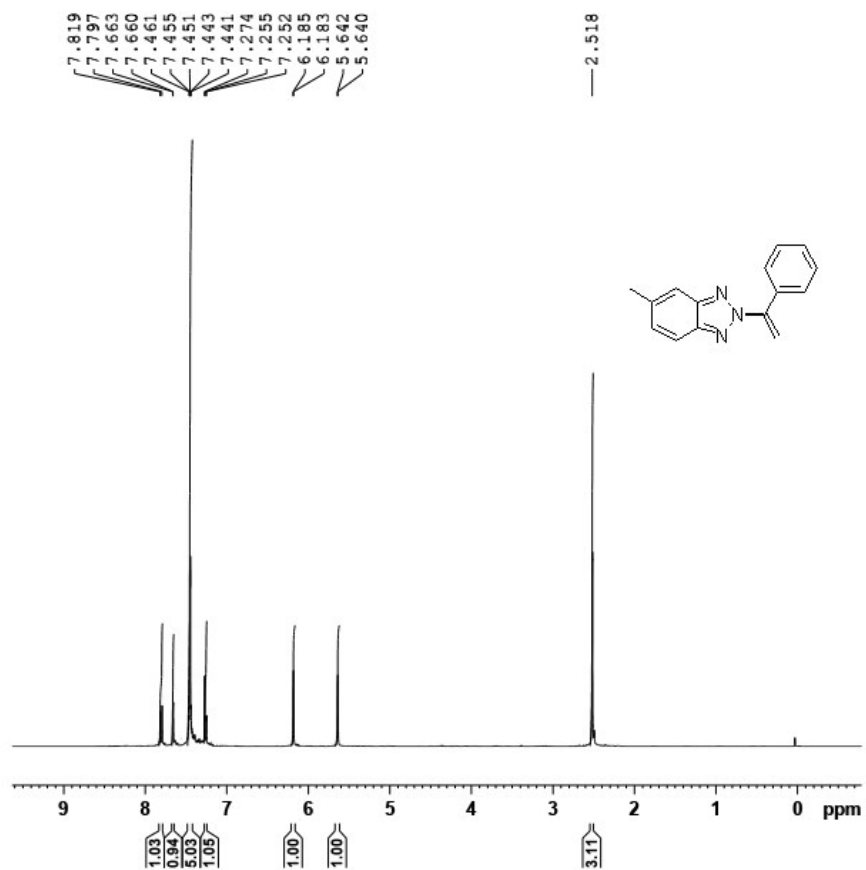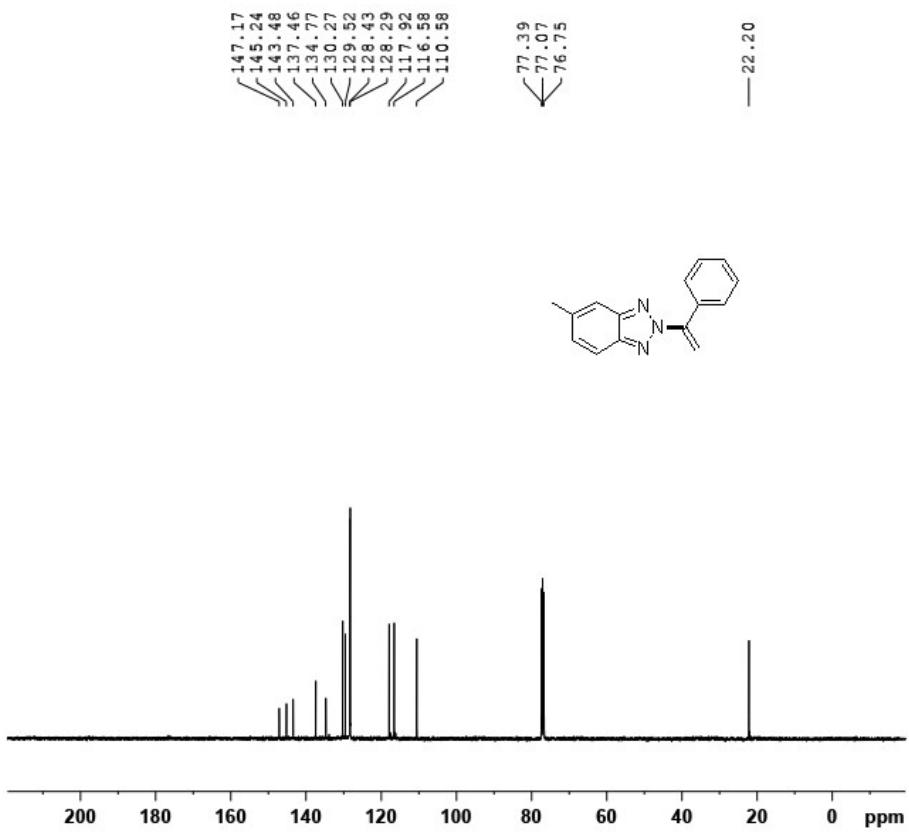

Compound 4x

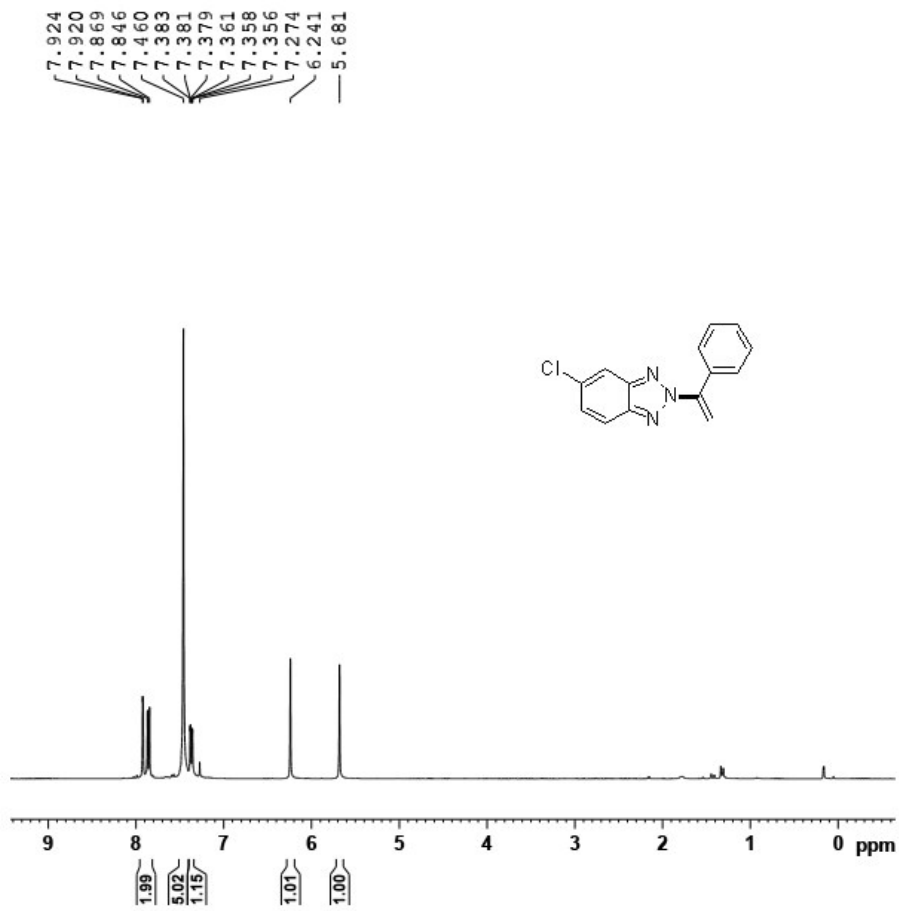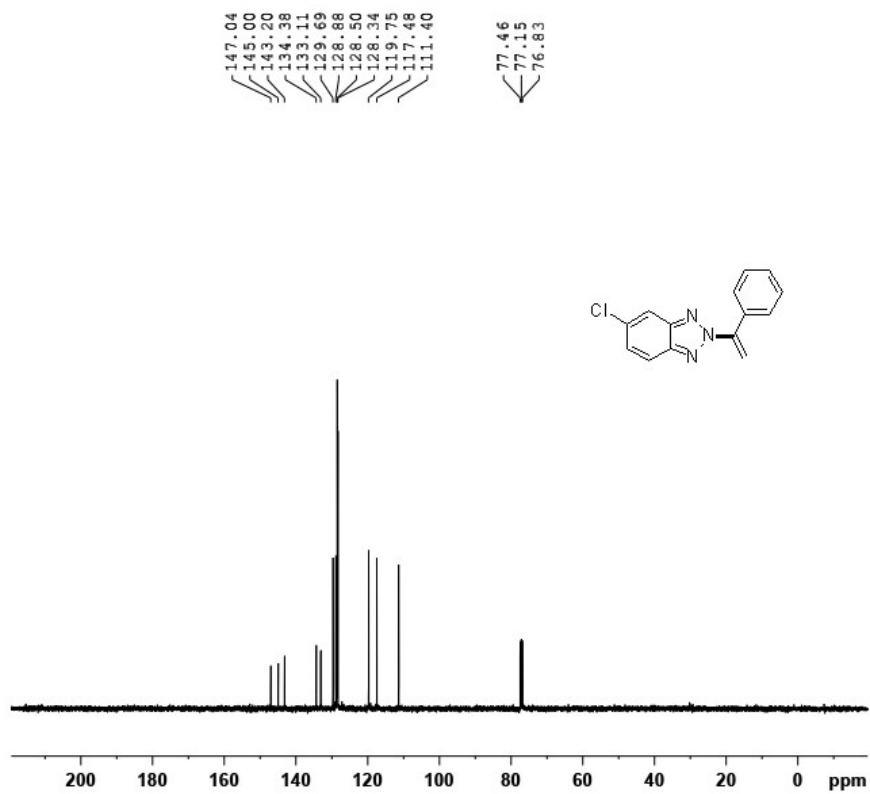

Compound 4y

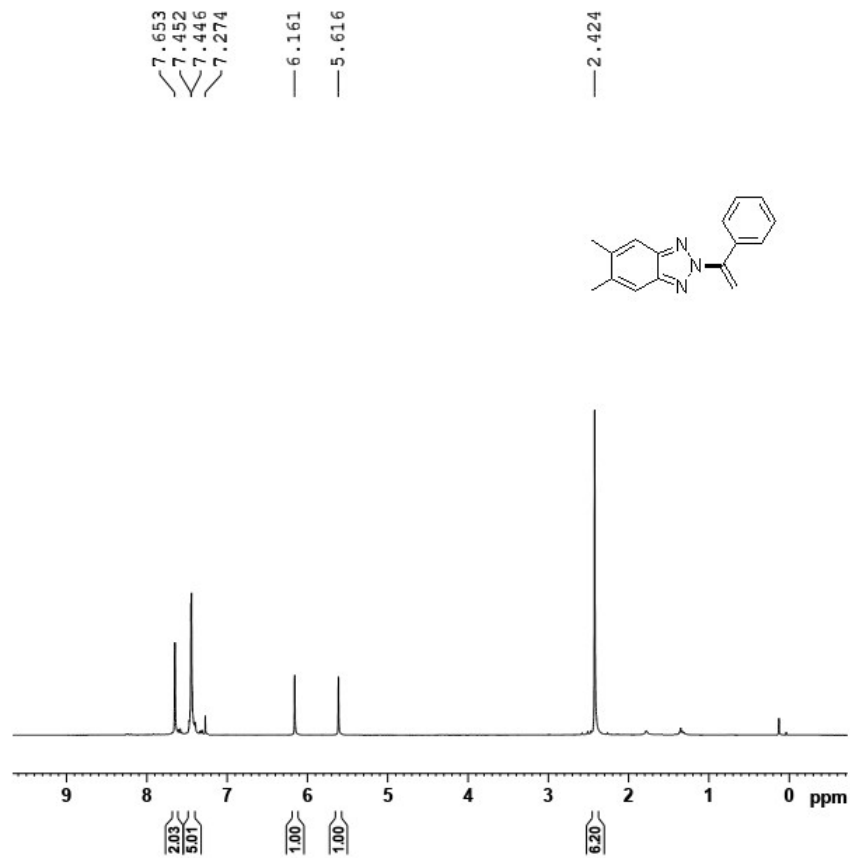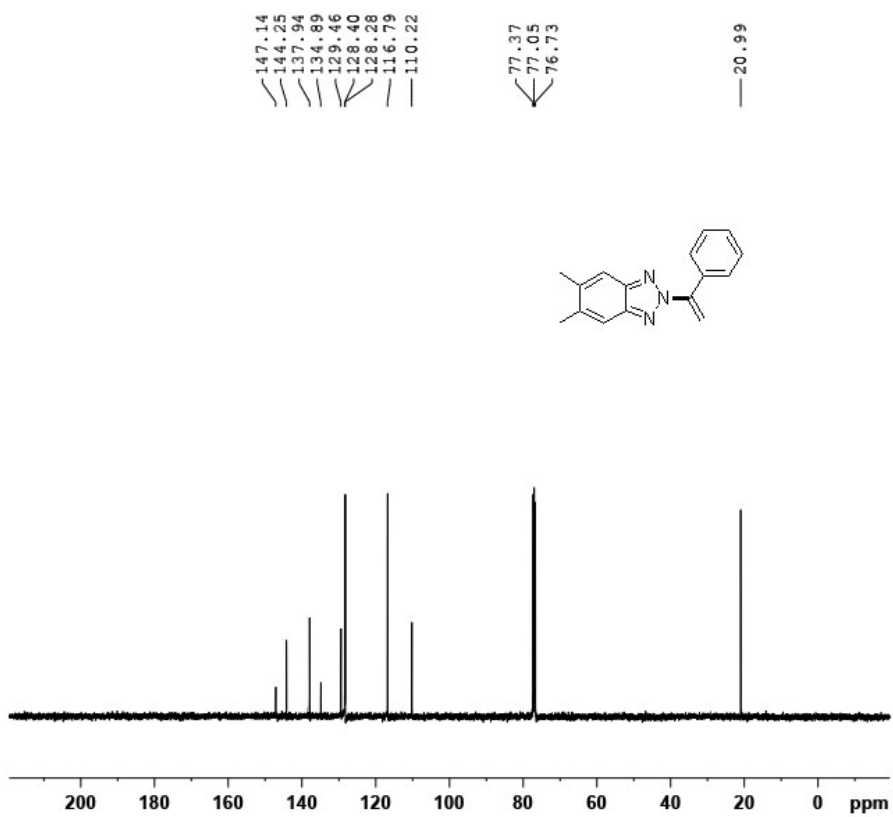

Supplement: d0cc01079k1.pdf [file d0cc01079k1.pdf]
